# Supplementary material for: Rhodium-catalyzed C2 and C4 C–H activation/annulation of 3-(1H-indol-3-yl)-3-oxopropanenitriles with internal alkynes: a facile access to substituted and fused carbazoles
Source: Royal Society of Chemistry journal article supplement (doi:10.1039/c7cc02808c), 2017-01-01
Supplement: c7cc02808c1.pdf [file c7cc02808c1.pdf]

## Supporting Information

### **Rhodium-Catalyzed C2 and C4 C-H Activation/Annulation of indoles with internal alkynes: A Facile Access to Substituted and Fused Carbazoles**

Tao Zhou,<sup>†</sup> Bin Li,<sup>†</sup> and Baiquan Wang<sup>\*,†,‡,§</sup>

<sup>†</sup>State Key Laboratory of Elemento-Organic Chemistry, College of Chemistry, and

<sup>‡</sup>Collaborative Innovation Center of Chemical Science and Engineering, Nankai University,  
Tianjin 300071, China

<sup>§</sup>State Key Laboratory of Organometallic Chemistry, Shanghai Institute of Organic Chemistry,  
Chinese Academy of Sciences, Shanghai 200032, China

bqwang@nankai.edu.cn

## Contents

|                                                                                        |         |
|----------------------------------------------------------------------------------------|---------|
| Table of Contents                                                                      | S1      |
| Experimental Section: General Considerations                                           | S2      |
| Table S1                                                                               | S3      |
| General Procedure for the Rh(III)-Catalyzed Cascade Synthesis (A–E)                    | S4–S6   |
| Preparation and Characterization of Products <b>3</b> , <b>4</b> , <b>6</b> , <b>8</b> | S6–S21  |
| Mechanism Research                                                                     | S22–S23 |
| X-ray Crystallography                                                                  | S24     |
| Fluorescence Spectra                                                                   | S25     |
| NMR Spectra                                                                            | S26–S67 |
| References                                                                             | S68     |

## Experimental Section:

**General Considerations.** All reactions were carried out under argon atmosphere using standard Schlenk technique.  $^1\text{H}$  NMR (400 MHz),  $^{19}\text{F}$  (376 MHz), and  $^{13}\text{C}$  NMR (100MHz) were recorded on Bruker AV400 NMR spectrometer with  $\text{CDCl}_3$  as solvent. Chemical shifts of  $^1\text{H}$ ,  $^{19}\text{F}$ , and  $^{13}\text{C}$  NMR spectra are reported in parts per million (ppm). The residual solvent signals were used as references and the chemical shifts converted to the TMS scale ( $\text{CDCl}_3$ :  $\delta_{\text{H}} = 7.26$  ppm,  $\delta_{\text{C}} = 77.00$  ppm). All coupling constants ( $J$  values) were reported in Hertz (Hz). Multiplicities are reported as follows: singlet (s), doublet (d), doublet of doublets (dd), triplet (t), quartet (q), and multiplet (m). Column chromatography was performed on silica gel 200–300 mesh. Analytical thin-layer chromatography (TLC) was performed on pre-coated, glass-backed silica gel plates. Visualization of the developed chromatogram was performed by UV absorbance (254 nm). IR spectra were recorded as KBr disks on a Nicolet 380 FT-IR spectrometer. High-resolution mass spectrometry (HRMS) were done on Varian 7.0 T FTICR-mass spectrometer.  $[\text{Cp}^*\text{RhCl}_2]_2$  was prepared from  $\text{RhCl}_3 \cdot x\text{H}_2\text{O}$  following a literature procedure.<sup>[1]</sup> The substrates **1a-1l** was prepared according to the literature we reported before.<sup>[2]</sup> Unless otherwise noted below, all other compounds have been reported in the literature or are commercially available from Alfa Aesar China (Tianjin) Chemical Co., Ltd. without any further purification.

**Table1 S1** Optimization studies<sup>a, b</sup>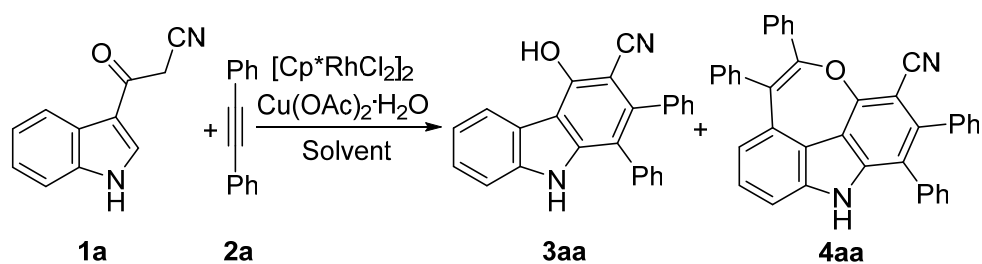

| entry                 | Ratio<br>( <b>1a</b> : <b>2a</b> ) | Solvent                            | Additive             | T (°C)     | Yield of <b>3aa</b><br>[%] | Yield of <b>4aa</b><br>[%] |
|-----------------------|------------------------------------|------------------------------------|----------------------|------------|----------------------------|----------------------------|
| 1                     | 1.1:1                              | DMF                                |                      | 100        | 55                         | 7                          |
| 2                     | <b>1.5:1</b>                       | <b>DMF</b>                         |                      | <b>100</b> | <b>75</b>                  | <b>Trace</b>               |
| 3                     | 1.5:1                              | CF <sub>3</sub> CH <sub>2</sub> OH |                      | 100        | 59                         | trace                      |
| 4                     | 1.5:1                              | NMP                                |                      | 100        | 33                         | trace                      |
| 5                     | 1.5:1                              | DMSO                               |                      | 100        | 20                         | trace                      |
| 6                     | 1.5:1                              | MeCN                               |                      | 100        | 24                         | trace                      |
| 7                     | 1.5:1                              | DMF                                | AcOH                 | 100        | 74                         | trace                      |
| 8                     | 1.5:1                              | DMF                                | MesCO <sub>2</sub> H | 100        | 71                         | trace                      |
| 9                     | 1.5:1                              | DMF                                | NaOAc                | 100        | 61                         | trace                      |
| 10                    | 1.5:1                              | DMF                                | KOAc                 | 100        | 57                         | trace                      |
| 11 <sup>c</sup>       | 1.5:1                              | DMF                                |                      | 100        | trace                      | trace                      |
| 12 <sup>d</sup>       | 1.5:1                              | DMF                                |                      | 100        | n.r.                       | n.r.                       |
| 13 <sup>e</sup>       | 1.5:1                              | DMF                                |                      | 100        | n.r.                       | n.r.                       |
| 14 <sup>f</sup>       | 0.5:1                              | DMF                                |                      | 100        | trace                      | 53                         |
| 15 <sup>f</sup>       | 0.6:1                              | DMF                                |                      | 100        | trace                      | 65                         |
| 16 <sup>f</sup>       | 0.7:1                              | DMF                                |                      | 100        | 19                         | 65                         |
| <b>17<sup>f</sup></b> | <b>0.65:1</b>                      | <b>DMF</b>                         |                      | <b>100</b> | <b>6</b>                   | <b>70</b>                  |
| 18 <sup>f,g</sup>     | 0.6:1                              | DMF                                | AgSbF <sub>6</sub>   | 100        | 16                         | 52                         |
| 19 <sup>f</sup>       | 0.65:1                             | DMF                                |                      | 120        | trace                      | 63                         |

<sup>a</sup> Reaction conditions: **1a** (0.6–1.5 equiv.), **2a** (1.0 equiv.), [{Cp\*RhCl<sub>2</sub>}]<sub>2</sub> (5 mol %), Cu(OAc)<sub>2</sub>·H<sub>2</sub>O (2.5 equiv.), additive (50 mol %), solvent (0.5 mL), 12 h, under Ar. <sup>b</sup> Yields of isolated products. <sup>c</sup> under air. [d] without [Cp\*RhCl<sub>2</sub>]<sub>2</sub>. <sup>e</sup> without Cu(OAc)<sub>2</sub>·H<sub>2</sub>O. [f] 24 h, Cu(OAc)<sub>2</sub>·H<sub>2</sub>O (2.2 equiv.). <sup>g</sup> AgSbF<sub>6</sub> (20 mol %). n.r. = no reaction. Cp\* = C<sub>5</sub>Me<sub>5</sub>, DMF = N,N-dimethylformamide..

### General Procedure for the Rh(III)-Catalyzed Cascade Synthesis (A)

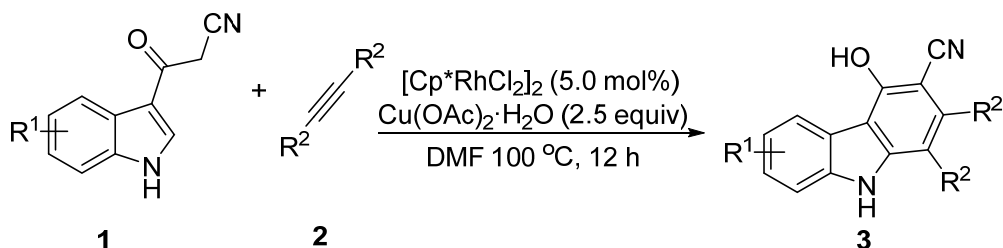

A mixture of substituted 3-(1H-indol-3-yl)-3-oxopropanenitrile (**1**) (0.3 mmol, 1.5 equiv), alkyne (**2**) (0.2 mmol, 1.0 equiv),  $[\text{Cp}^*\text{RhCl}_2]_2$  (6.2 mg, 0.01 mmol, 5.0 mol %), and  $\text{Cu}(\text{OAc})_2 \cdot \text{H}_2\text{O}$  (100 mg, 0.5 mmol, 2.5 equiv) were weighted in a Schlenk tube equipped with a stir bar. Dry DMF (0.5 mL) was added and the mixture was stirred at 100 °C for 12 h under Ar atmosphere. Afterwards, it was diluted with  $\text{CH}_2\text{Cl}_2$  and transferred to a round bottom flask. Silica was added to the flask and volatiles were evaporated under reduced pressure. The purification was performed by flash column chromatography on silica gel with EtOAc/petroleum ether.

### General Procedure for the Rh(III)-Catalyzed Cascade Synthesis (B)

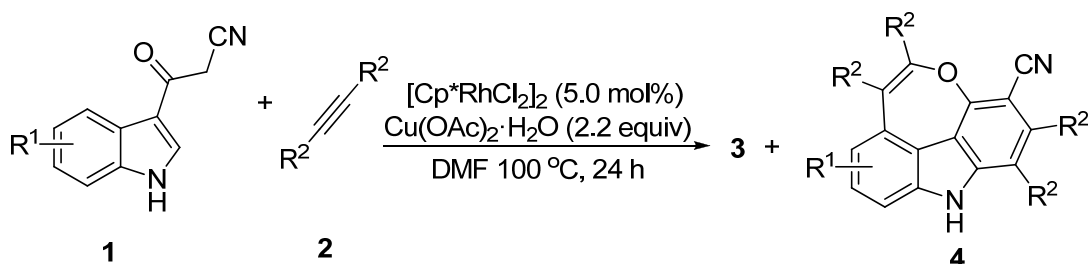

A mixture of substituted 3-(1H-indol-3-yl)-3-oxopropanenitrile (**1**) (0.195 mmol, 0.65 equiv), alkyne (**2**) (0.3 mmol, 1.0 equiv),  $[\text{Cp}^*\text{RhCl}_2]_2$  (9.3 mg, 0.01 mmol, 5.0 mol %), and  $\text{Cu}(\text{OAc})_2 \cdot \text{H}_2\text{O}$  (132 mg, 0.66 mmol, 2.2 equiv) were weighted in a Schlenk tube equipped with a stir bar. Dry DMF (0.5 mL) was added and the mixture was stirred at 100 °C for 24 h under Ar atmosphere. Afterwards, it was diluted with  $\text{CH}_2\text{Cl}_2$  and transferred to a round bottom flask. Silica was added to the flask and volatiles were evaporated under reduced pressure. The purification was performed by flash column chromatography on silica gel with DCE/petroleum ether.

### General Procedure for the Rh(III)-Catalyzed Cascade Synthesis (C)

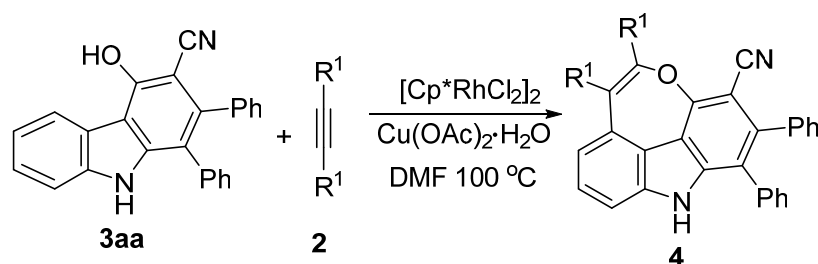

A mixture of substituted 4-hydroxy-1,2-diphenyl-9H-carbazole-3-carbonitrile (**3**) (0.12 mmol, 1.2 equiv), alkyne (**2**) (0.1 mmol, 1.0 equiv),  $[\text{Cp}^*\text{RhCl}_2]_2$  (3.1 mg, 0.005 mmol, 5.0 mol %), and  $\text{Cu}(\text{OAc})_2 \cdot \text{H}_2\text{O}$  (50 mg, 0.25 mmol, 2.5 equiv) were weighted in a Schlenk tube equipped with a stir bar. Dry DMF (0.5 mL) was added and the mixture was stirred at 100 °C for 12 h under Ar atmosphere. Afterwards, it was diluted with  $\text{CH}_2\text{Cl}_2$  and transferred to a round bottom flask. Silica was added to the flask and volatiles were evaporated under reduced pressure. The purification was performed by flash column chromatography on silica gel with EtOAc/petroleum ether.

### General Procedure for the Rh(III)-Catalyzed Cascade Synthesis (D)

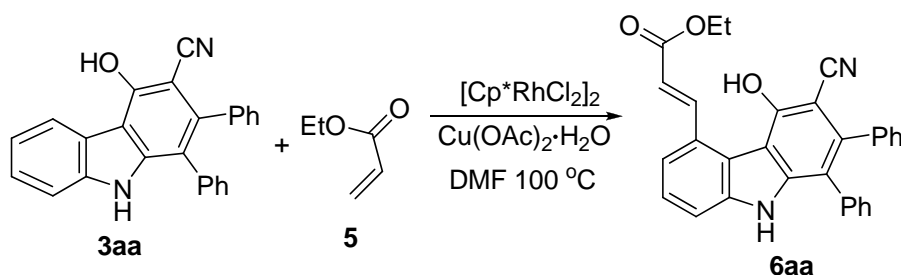

A mixture of substituted 4-hydroxy-1,2-diphenyl-9H-carbazole-3-carbonitrile (**3**) (0.1 mmol, 1.0 equiv), ethyl acrylate (**5**) (0.15 mmol, 1.0 equiv),  $[\text{Cp}^*\text{RhCl}_2]_2$  (3.1 mg, 0.005 mmol, 5.0 mol %), and  $\text{Cu}(\text{OAc})_2 \cdot \text{H}_2\text{O}$  (50 mg, 0.25 mmol, 2.5 equiv) were weighted in a Schlenk tube equipped with a stir bar. Dry DMF (0.5 mL) was added and the mixture was stirred at 100 °C for 12 h under Ar atmosphere. Afterwards, it was diluted with  $\text{CH}_2\text{Cl}_2$  and transferred to a round bottom flask. Silica was added to the flask and volatiles were evaporated under reduced pressure. The purification was performed by flash column chromatography on silica gel with EtOAc/petroleum ether.

## General Procedure for the Rh(III)-Catalyzed Cascade Synthesis (E)

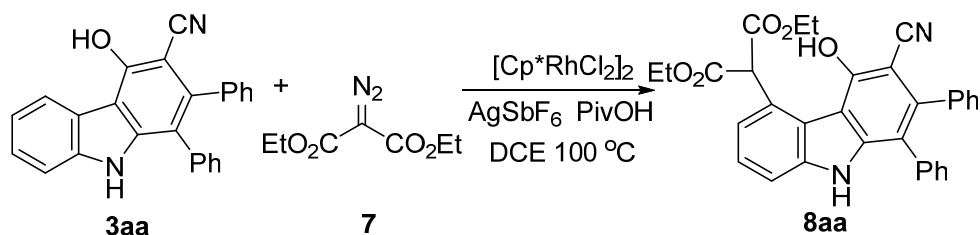

A mixture of substituted 4-hydroxy-1,2-diphenyl-9*H*-carbazole-3-carbonitrile (**3**) (0.1 mmol, 1.0 equiv), diethyl 2-diazomalonate (**7**) (0.15 mmol, 1.0 equiv), [Cp\*RhCl<sub>2</sub>]<sub>2</sub> (3.1 mg, 0.005 mmol, 5.0 mol %), and AgSbF<sub>6</sub> (6.8 mg, 0.02 mmol, 20 mol %) were weighted in a Schlenk tube equipped with a stir bar. Dry DCE (0.5 mL) was added and the mixture was stirred at 100 °C for 12 h under Ar atmosphere. Afterwards, it was diluted with CH<sub>2</sub>Cl<sub>2</sub> and transferred to a round bottom flask. Silica was added to the flask and volatiles were evaporated under reduced pressure. The purification was performed by flash column chromatography on silica gel with EtOAc/petroleum ether.

## Characterization of Products 3, 4, 6, 8

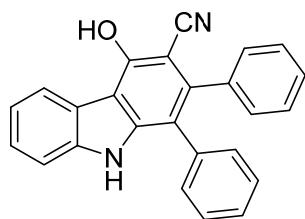

### 4-Hydroxy-1,2-diphenyl-9*H*-carbazole-3-carbonitrile (**3aa**)

The title compound was isolated by column chromatography (eluent: EtOAc/petroleum ether = 1/5 to 1/2) as a yellow solid in 75% yield (54.3 mg, 0.150mmol) following the general procedure A. Mp:

244–246 °C. **<sup>1</sup>H NMR (DMSO, 400 MHz):** δ 11.09 (s, 1H), 11.05 (d, *J* = 1.7 Hz, 1H), 8.32 (d, *J* = 7.8 Hz, 1H), 7.52 (d, *J* = 8.1 Hz, 1H), 7.42 – 7.37 (m, 1H), 7.33 – 7.11 (m, 11H). **<sup>13</sup>C NMR (DMSO, 100 MHz):** δ 155.78, 141.99, 140.57, 139.81, 138.18, 135.69, 130.63, 130.27, 128.23, 127.47, 127.17, 126.96, 125.48, 122.18, 121.29, 119.91, 118.25, 117.73, 111.59, 111.32, 91.84. **HRMS (ESI):** Calcd for C<sub>25</sub>H<sub>17</sub>N<sub>2</sub>O [M+H]<sup>+</sup> 361.1335, found: 361.1334.

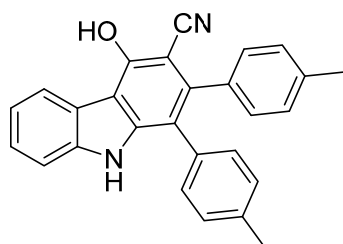

### 4-Hydroxy-1,2-di-*p*-tolyl-9*H*-carbazole-3-carbonitrile (**3ab**)

The title compound was isolated by column chromatography (eluent: EtOAc/petroleum ether = 1/5 to 1/2) as a yellow solid in 68% yield (53.2mg, 0.136 mmol) following the general procedure A. Mp: 260–262 °C. **<sup>1</sup>H NMR (DMSO, 400 MHz):** δ

11.00 (s, 1H), 10.96 (s, 1H), 8.29 (d,  $J = 7.9$  Hz, 1H), 7.50 (d,  $J = 8.1$  Hz, 1H), 7.40 – 7.36 (m, 1H), 7.26 – 7.21 (m, 1H), 7.13 (d,  $J = 8.0$  Hz, 2H), 7.10 – 7.01 (m, 6H), 2.29 (s, 3H), 2.27 (s, 3H).  **$^{13}\text{C}$  NMR (DMSO, 100 MHz):**  $\delta$  155.84, 142.40, 140.67, 139.98, 136.42, 136.13, 135.55, 133.01, 130.66, 130.34, 129.19, 128.37, 125.61, 122.34, 121.50, 120.06, 118.41, 118.03, 111.80, 111.37, 92.21, 20.92. **HRMS (ESI):** Calcd for  $\text{C}_{27}\text{H}_{21}\text{N}_2\text{O}$   $[\text{M}+\text{H}]^+$  389.1648, found: 389.1645.

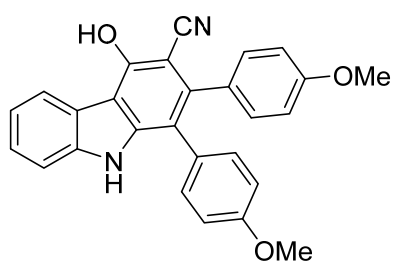

**4-Hydroxy-1,2-bis(4-methoxyphenyl)-9H-carbazole-3-carbonitrile (3ac)**

The title compound was isolated by column chromatography (eluent: EtOAc/petroleum ether = 1/5 to 1/1) as a yellow solid in 40% yield (33.6 mg, 0.080 mmol) following the general procedure A. Mp: 263–265 °C.  **$^1\text{H}$  NMR (DMSO, 400 MHz):**  $\delta$  10.99 (s, 1H), 10.90 (s, 1H), 8.29 (d,  $J = 7.9$  Hz, 1H), 7.50 (d,  $J = 8.1$  Hz, 1H), 7.39 (d,  $J = 7.4$  Hz, 1H), 7.24 (d,  $J = 7.4$  Hz, 1H), 7.09 (dd,  $J = 8.4, 3.9$  Hz, 4H), 6.88 (d,  $J = 8.5$  Hz, 2H), 6.81 (d,  $J = 8.5$  Hz, 2H), 3.75 (s, 3H), 3.73 (s, 3H).  **$^{13}\text{C}$  NMR (DMSO, 100 MHz):**  $^{13}\text{C}$  NMR (101 MHz, )  $\delta$  158.54, 158.39, 155.96, 142.82, 140.74, 140.17, 132.13, 131.87, 130.86, 128.29, 125.78, 122.54, 121.76, 120.22, 118.52, 114.19, 113.36, 111.96, 111.49, 92.53, 55.32, 55.28. **HRMS (ESI):** Calcd for  $\text{C}_{27}\text{H}_{21}\text{N}_2\text{O}_3$   $[\text{M}+\text{H}]^+$  421.1547, found: 421.1545.

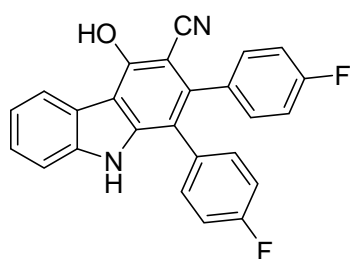

**1,2-Bis(4-fluorophenyl)-4-hydroxy-9H-carbazole-3-carbonitrile (3ad)**

The title compound was isolated by column chromatography (eluent: EtOAc/petroleum ether = 1/5 to 1/2) as a yellow solid in 67% yield (52.9 mg, 0.134mmol) following the general procedure A. Mp: 238–241 °C.  **$^1\text{H}$  NMR (DMSO, 400 MHz):**  $\delta$  11.15 (s, 1H), 11.11 (s, 1H), 8.32 (d,  $J = 7.8$  Hz, 1H), 7.51 (d,  $J = 8.1$  Hz, 1H), 7.41 (s, 1H), 7.27 – 7.06 (m, 9H).  **$^{13}\text{C}$  NMR (DMSO, 100 MHz):**  $\delta$  162.47, 162.42, 160.04, 159.99, 155.81, 142.09, 139.77, 139.64, 134.36, 132.72, 132.63, 132.32, 132.23, 131.86, 125.58, 122.22, 121.25, 119.98, 117.60,

117.45, 115.28, 115.06, 114.58, 114.37, 111.49, 111.38, 91.78. **<sup>19</sup>F NMR (DMSO, 376 MHz):**  $\delta$  -114.74, -115.19. **HRMS (ESI):** Calcd for C<sub>25</sub>H<sub>15</sub>F<sub>2</sub>N<sub>2</sub>O [M+H]<sup>+</sup> 397.1147, found: 397.1145.

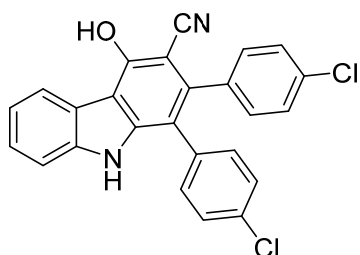

**1,2-Bis(4-chlorophenyl)-4-hydroxy-9H-carbazole-3-carbonitrile (3ae)**

The title compound was isolated by column chromatography (eluent: EtOAc/petroleum ether = 1/5 to 1/2) as a yellow solid in 62% yield (53.0 mg, 0.124 mmol) following the general procedure A. Mp: 250–252 °C. **<sup>1</sup>H NMR (DMSO, 400 MHz):**  $\delta$  11.19 (s, 2H), 8.31 (d, *J* = 7.8 Hz, 1H), 7.49 (d, *J* = 8.1 Hz, 1H), 7.45 – 7.33 (m, 5H), 7.29 – 7.18 (m, 5H). **<sup>13</sup>C NMR (DMSO, 100 MHz):**  $\delta$  156.00, 141.93, 139.79, 139.22, 136.86, 134.38, 132.54, 132.26, 132.10, 132.00, 128.44, 127.72, 125.69, 122.26, 121.20, 120.08, 117.55, 117.07, 111.49, 91.58. **HRMS (ESI):** Calcd for C<sub>25</sub>H<sub>15</sub>Cl<sub>2</sub>N<sub>2</sub>O [M+H]<sup>+</sup> 429.0556, found: 429.0544.

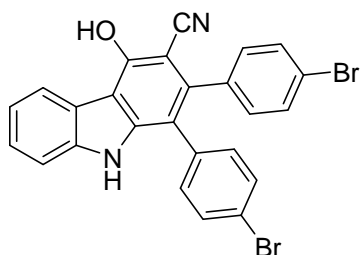

**1,2-Bis(4-bromophenyl)-4-hydroxy-9H-carbazole-3-carbonitrile (3af)**

The title compound was isolated by column chromatography (eluent: EtOAc/petroleum ether = 1/5 to 1/2) as a yellow solid in 49% yield (50.5 mg 0.148 mmol) following the general procedure C. Mp: 251–254 °C. **<sup>1</sup>H NMR (DMSO, 400 MHz):** <sup>1</sup>H NMR (400 MHz, )  $\delta$  11.19 (s, 2H), 8.31 (d, *J* = 7.7 Hz, 1H), 7.66 – 6.95 (m, 12H). **<sup>13</sup>C NMR (DMSO, 100 MHz):**  $\delta$  <sup>1</sup>H NMR (101 MHz, )  $\delta$  156.23, 142.08, 139.99, 139.36, 137.43, 134.96, 133.07, 132.61, 131.57, 130.85, 125.90, 122.45, 121.39, 121.19, 120.93, 120.29, 117.74, 117.20, 111.72, 91.74. **HRMS (ESI):** Calcd for C<sub>25</sub>H<sub>15</sub>Br<sub>2</sub>N<sub>2</sub>O [M+H]<sup>+</sup> 516.9546, found: 516.9540.

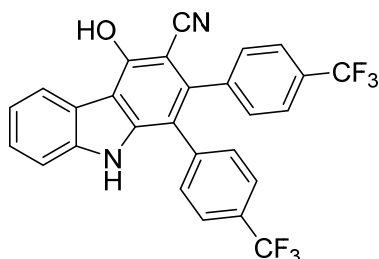

**4-Hydroxy-1,2-bis(4-(trifluoromethyl)phenyl)-9H-carbazole-3-carbonitrile (3ag)**

The title compound was isolated by column chromatography (eluent: EtOAc/petroleum ether = 1/5 to 1/2) as a yellow solid in 52% yield (51.8 mg, 0.104 mmol) following the general



procedure B. Mp: 228–230 °C. **<sup>1</sup>H NMR (DMSO, 400 MHz):**  $\delta$  11.56 – 11.07 (m, 2H), 8.34 (d,  $J$  = 7.3 Hz, 1H), 7.72 – 7.61 (m, 4H), 7.55 – 7.37 (m, 6H), 7.32 – 7.23 (m, 1H). **<sup>13</sup>C NMR (DMSO, 100 MHz):**  $\delta$  156.30, 142.09, 141.71, 139.85, 139.73, 139.06, 131.59, 131.20, 128.10, 127.89, 127.79, 127.58, 125.85, 125.51, 125.40, 125.21, 124.52, 122.80, 122.69, 122.33, 121.14, 120.22, 117.35, 116.87, 111.80, 111.56, 91.46. **<sup>19</sup>F NMR (DMSO, 376 MHz):**  $\delta$  -60.94, -60.98. **HRMS (ESI):** Calcd for C<sub>27</sub>H<sub>15</sub>F<sub>6</sub>N<sub>2</sub>O [M+H]<sup>+</sup> 497.1083, found: 497.1076.

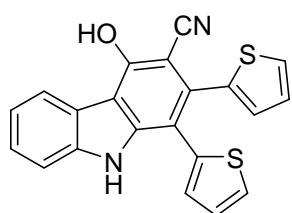

**4-Hydroxy-1,2-di(thiophen-2-yl)-9H-carbazole-3-carbonitrile (3ah)**

The title compound was isolated by column chromatography (eluent: EtOAc/petroleum ether = 1/5 to 1/2) as a yellow solid in 46% yield (34.3mg, 0.092 mmol) following the general procedure A. Mp: 227–229 °C. **<sup>1</sup>H NMR (DMSO, 400 MHz):**  $\delta$  11.34 (s, 2H), 8.31 (d,  $J$  = 7.8 Hz, 1H), 7.63 – 7.55 (m, 3H), 7.46 – 7.40 (m, 1H), 7.27 (t,  $J$  = 7.5 Hz, 1H), 7.17 – 7.09 (m, 3H), 7.07 – 7.02 (m, 1H). **<sup>13</sup>C NMR (DMSO, 100 MHz):**  $\delta$  156.37, 142.31, 139.79, 138.00, 135.58, 133.88, 129.57, 129.20, 127.95, 127.64, 127.14, 126.61, 125.91, 122.32, 121.17, 120.24, 117.20, 111.95, 111.80, 92.90. **HRMS (ESI):** Calcd for C<sub>21</sub>H<sub>13</sub>N<sub>2</sub>OS<sub>2</sub> [M+H]<sup>+</sup> 373.0464, found: 373.0469.

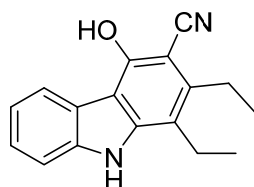

**11-Methoxy-7,7-dimethyl-4,9-dioxo-1,2,4,5,6,7,8,9-octahydrobenzo[4,5]azepino[3,2,1-hi]indole-5-carbonitrile (3ai)**

The title compound was isolated by column chromatography (eluent: EtOAc/petroleum ether = 1/5 to 1/2) as a yellow solid in 17% yield (9.0 mg, 0.034 mmol) following the general procedure A. Mp: 186–188 °C. **<sup>1</sup>H NMR (DMSO, 400 MHz):** <sup>1</sup>H NMR (400 MHz, )  $\delta$  11.54 (s, 1H), 10.54 (s, 1H), 8.20 (d,  $J$  = 7.8 Hz, 1H), 7.51 (d,  $J$  = 8.1 Hz, 1H), 7.38 (s, 1H), 7.20 (d,  $J$  = 7.6 Hz, 1H), 2.94 – 2.82 (m, 4H), 1.26 – 1.19 (m, 6H). **<sup>13</sup>C NMR (DMSO, 100 MHz):** <sup>13</sup>C NMR (101 MHz, )  $\delta$  154.69, 142.49, 140.52, 139.13, 124.81, 121.75, 121.38, 119.29, 117.75, 117.26, 110.69, 110.03, 90.73, 23.89, 19.75, 15.41, 14.62. **HRMS (ESI):** Calcd for C<sub>17</sub>H<sub>17</sub>N<sub>2</sub>O [M+H]<sup>+</sup> 265.1335, found: 265.1334.

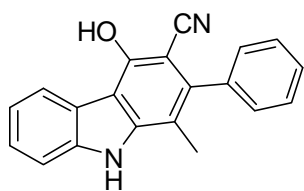

**4-Hydroxy-1-methyl-2-phenyl-9H-carbazole-3-carbonitrile (3al)**

The title compound was isolated by column chromatography (eluent: EtOAc/petroleum ether = 1/5 to 1/2) as a yellow solid in 16% yield (9.3 mg, 0.032 mmol) following the general procedure A. Mp:

206–208 °C. **<sup>1</sup>H NMR (DMSO, 400 MHz):**  $\delta$  11.70 (s, 1H), 10.72 (s, 1H), 8.27 (d,  $J$  = 7.8 Hz, 1H), 7.58 – 7.42 (m, 5H), 7.36 (d,  $J$  = 6.9 Hz, 2H), 7.24 (t,  $J$  = 7.5 Hz, 1H), 2.21 (s, 3H). **<sup>13</sup>C NMR (DMSO, 100 MHz):**  $\delta$  154.39, 142.70, 140.27, 139.30, 138.21, 129.36, 127.89, 127.44, 125.16, 122.05, 121.33, 119.56, 117.66, 111.42, 110.86, 110.67, 91.25, 13.91. **HRMS (ESI):** Calcd for C<sub>20</sub>H<sub>14</sub>N<sub>2</sub>NaO [M+Na]<sup>+</sup> 221.0998 found: 221.0999.

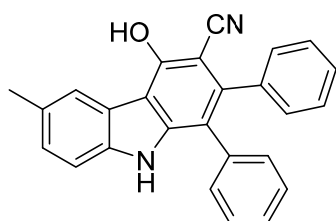

**4-Hydroxy-6-methyl-1,2-diphenyl-9H-carbazole-3-carbonitrile (3ba)**

The title compound was isolated by column chromatography (eluent: EtOAc/petroleum ether = 1/5 to 1/2) as a yellow solid in

71% yield (53.3 mg, 0.142 mmol) following the general procedure A. Mp: 237–239 °C. **<sup>1</sup>H NMR (DMSO, 400 MHz):**  $\delta$  10.95 (s, 2H), 8.11 (s, 1H), 7.40 (d,  $J$  = 8.2 Hz, 1H), 7.32 – 7.21 (m, 7H), 7.20 – 7.14 (m, 4H), 2.48 (s, 3H). **<sup>13</sup>C NMR (DMSO, 100 MHz):**  $\delta$  155.79, 142.16, 140.34, 138.22, 138.03, 135.74, 130.63, 130.29, 128.60, 128.22, 127.46, 127.14, 126.93, 126.83, 121.98, 121.49, 118.23, 117.84, 111.30, 111.10, 91.50, 21.19. **HRMS (ESI):** Calcd for C<sub>26</sub>H<sub>19</sub>N<sub>2</sub>O [M+H]<sup>+</sup> 375.1492, found: 375.1487.

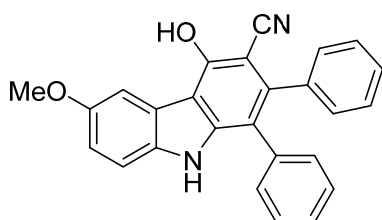

**4-Hydroxy-6-methoxy-1,2-diphenyl-9H-carbazole-3-carbonitrile (3ca)**

The title compound was isolated by column chromatography (eluent: EtOAc/petroleum ether = 1/5 to 1/2) as a yellow solid

in 60% yield (47.1 mg, 0.120 mmol) following the general procedure A. Mp: 241–243 °C. **<sup>1</sup>H NMR (DMSO, 400 MHz):**  $\delta$  11.00 (s, 1H), 10.92 (s, 1H), 7.85 (d,  $J$  = 2.4 Hz, 1H), 7.43 (d,  $J$  = 8.8 Hz, 1H), 7.36 – 7.14 (m, 10H), 7.06 (dd,  $J$  = 8.8, 2.5 Hz, 1H), 3.87 (s, 3H). **<sup>13</sup>C NMR (DMSO, 100 MHz):** <sup>1</sup>H NMR (400 MHz, )  $\delta$  11.00 (s, 1H), 10.92 (s, 1H), 7.85 (d,  $J$  = 2.4 Hz,

1H), 7.43 (d,  $J = 8.8$  Hz, 1H), 7.36 – 7.14 (m, 10H), 7.06 (dd,  $J = 8.8, 2.5$  Hz, 1H), 3.87 (s, 3H). **HRMS (ESI):** Calcd for  $C_{26}H_{19}N_2O_2$   $[M+H]^+$  391.1441, found: 391.1436.

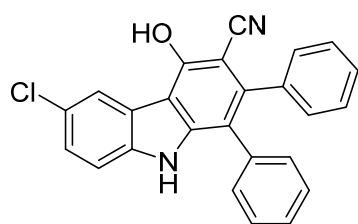

**6-Chloro-4-hydroxy-1,2-diphenyl-9H-carbazole-3-carbonitrile (3da)**

The title compound was isolated by column chromatography (eluent: EtOAc/petroleum ether = 1/5 to 1/2) as a yellow solid in 28% yield (22.4mg, 0.056 mmol) following the general procedure A. Mp: 263–266 °C.  **$^1H$  NMR (DMSO, 400 MHz):**  $\delta$  11.26 (s, 1H), 11.24 (s, 1H), 8.28 (s, 1H), 7.52 (d,  $J = 8.7$  Hz, 1H), 7.46 – 7.41 (m, 1H), 7.35 – 7.14 (m, 10H).  **$^{13}C$  NMR (DMSO, 100 MHz):**  $\delta$  156.06, 142.58, 141.40, 138.35, 138.01, 135.43, 130.61, 130.21, 128.30, 127.53, 127.31, 127.11, 125.42, 124.12, 122.50, 121.26, 118.40, 117.54, 113.15, 110.59, 92.19. **HRMS (ESI):** Calcd for  $C_{25}H_{16}ClN_2O$   $[M+H]^+$  395.0946, found: 395.0943.

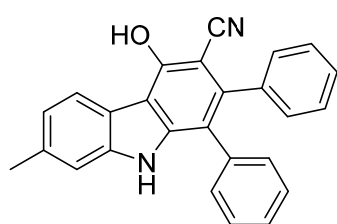

**4-Hydroxy-7-methyl-1,2-diphenyl-9H-carbazole-3-carbonitrile (3ea)**

The title compound was isolated by column chromatography (eluent: EtOAc/petroleum ether = 1/5 to 1/2) as a yellow solid in 52% yield (38.9 mg, 0.104 mmol) following the general procedure A. Mp: 232–234 °C.  **$^1H$  NMR (DMSO, 400 MHz):**  $\delta$  10.97 (s, 1H), 10.93 (s, 1H), 8.18 (d,  $J = 8.0$  Hz, 1H), 7.31 – 7.21 (m, 7H), 7.19 – 7.14 (m, 4H), 7.08 (d,  $J = 8.0$  Hz, 1H), 2.45 (s, 3H).  **$^{13}C$  NMR (DMSO, 100 MHz):**  $\delta$  155.50, 142.15, 140.48, 140.36, 138.43, 135.95, 135.22, 130.84, 130.49, 128.42, 127.65, 127.32, 127.14, 122.08, 121.66, 119.23, 118.44, 117.97, 111.71, 111.60, 92.01, 21.88. **HRMS (ESI):** Calcd for  $C_{26}H_{19}N_2O$   $[M+H]^+$  375.1492, found: 375.1491.

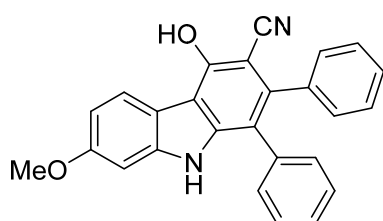

**4-Hydroxy-7-methoxy-1,2-diphenyl-9H-carbazole-3-carbonitrile (3fa)**

The title compound was isolated by column chromatography (eluent: EtOAc/petroleum ether = 1/5 to 1/2) as a yellow solid in 48% yield (37.6 mg, 0.096 mmol) following the general procedure B. Mp: 257–259 °C.  **$^1H$**

**NMR (DMSO, 400 MHz):**  $\delta$  10.96 (s, 1H), 10.85 (s, 1H), 8.18 (d,  $J$  = 8.6 Hz, 1H), 7.35 – 7.14 (m, 10H), 7.03 (d,  $J$  = 1.9 Hz, 1H), 6.88 (dd,  $J$  = 8.6, 2.1 Hz, 1H), 3.81 (s, 3H).  **$^{13}\text{C}$  NMR (DMSO, 100 MHz):**  $\delta$  158.16, 154.68, 141.97, 141.28, 139.43, 138.20, 135.73, 130.59, 130.32, 128.20, 127.43, 127.09, 126.89, 122.88, 118.13, 114.97, 111.49, 108.89, 95.17, 92.05, 55.06. **HRMS (ESI):** Calcd for  $\text{C}_{26}\text{H}_{19}\text{N}_2\text{O}_2$   $[\text{M}+\text{H}]^+$  391.1441, found: 391.1443.

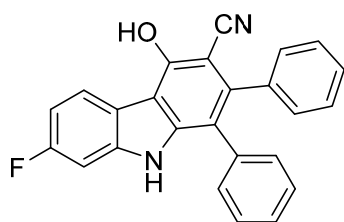

**7-Fluoro-4-hydroxy-1,2-diphenyl-9H-carbazole-3-carbonitrile (3ga)**

The title compound was isolated by column chromatography (eluent: EtOAc/petroleum ether = 1/5 to 1/2) as a yellow solid in 45% yield (34.1mg, 0.090 mmol) following the general procedure B. Mp: 270–272 °C.  **$^1\text{H}$  NMR (DMSO, 400 MHz):**  $\delta$  11.16 (s, 1H), 11.15 – 10.97 (m, 1H), 8.36 – 8.22 (m, 1H), 7.32 – 7.21 (m, 7H), 7.17 (d,  $J$  = 5.5 Hz, 4H), 7.13 – 7.07 (m, 1H).  **$^{13}\text{C}$  NMR (DMSO, 100 MHz):**  $\delta$  161.90, 159.52, 155.33, 142.54, 140.61, 140.53, 140.48, 138.00, 135.48, 130.55, 130.22, 128.24, 127.46, 127.20, 127.02, 123.50, 123.39, 118.28, 118.02, 117.50, 111.00, 108.06, 107.82, 98.10, 97.83, 92.39.  **$^{19}\text{F}$  NMR (DMSO, 376 MHz):**  $\delta$  -115.27. **HRMS (ESI):** Calcd for  $\text{C}_{25}\text{H}_{16}\text{FN}_2\text{O}$   $[\text{M}+\text{H}]^+$  379.1241, found: 379.1238.

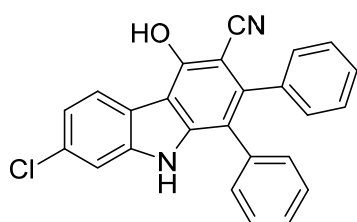

**7-Chloro-4-hydroxy-1,2-diphenyl-9H-carbazole-3-carbonitrile (3ha)**

The title compound was isolated by column chromatography (eluent: EtOAc/petroleum ether = 1/5 to 1/2) as a yellow solid in 50% yield (39.5mg, 0.100 mmol) following the general procedure B. Mp: 281–283 °C.  **$^1\text{H}$  NMR (DMSO, 400 MHz):**  $\delta$  11.24 (s, 1H), 11.19 (s, 1H), 8.28 (d,  $J$  = 8.4 Hz, 1H), 7.51 (s, 1H), 7.34 – 7.14 (m, 11H).  **$^{13}\text{C}$  NMR (DMSO, 100 MHz):**  $\delta$  155.71, 142.34, 141.18, 140.49, 137.97, 135.42, 130.58, 130.20, 129.88, 128.30, 127.50, 127.28, 127.11, 123.45, 120.19, 118.39, 117.45, 111.20, 110.89, 92.43. **HRMS (ESI):** Calcd for  $\text{C}_{25}\text{H}_{16}\text{ClN}_2\text{O}$   $[\text{M}+\text{H}]^+$  395.0946, found: 395.0942.

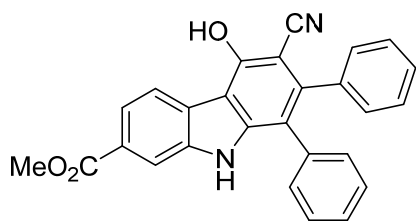

**Methyl 6-cyano-5-hydroxy-7,8-diphenyl-9H-carbazole-2-carboxylate (3ia)**

The title compound was isolated by column chromatography (eluent: EtOAc/petroleum ether = 1/5 to 1/2) as a yellow solid in 5% yield (8.3mg, 0.020 mmol) following the general procedure B. Mp: >300 °C. **<sup>1</sup>H NMR (DMSO, 400 MHz):** <sup>1</sup>H NMR (400 MHz, ) δ 11.41 (s, 1H), 11.36 (s, 1H), 8.40 (d, J = 8.3 Hz, 1H), 8.17 (s, 1H), 7.88 (dd, J = 8.3, 0.8 Hz, 1H), 7.35 – 7.29 (m, 3H), 7.28 – 7.25 (m, 3H), 7.22 – 7.17 (m, 4H), 3.89 (s, 3H). **<sup>13</sup>C NMR (DMSO, 100 MHz):** <sup>13</sup>C NMR (101 MHz, ) δ 166.65, 156.54, 143.28, 141.95, 139.25, 137.95, 135.36, 130.61, 130.17, 128.32, 127.53, 127.35, 127.14, 126.23, 125.12, 122.05, 120.66, 118.42, 112.97, 110.86, 92.20, 52.07. **HRMS (ESI):** Calcd for C<sub>27</sub>H<sub>19</sub>N<sub>2</sub>O<sub>3</sub> [M+H]<sup>+</sup> 419.1390, found: 419.1398.

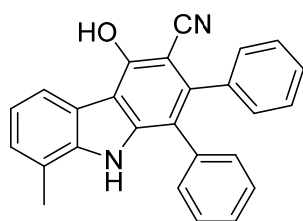

**4-Hydroxy-8-methyl-1,2-diphenyl-9H-carbazole-3-carbonitrile (3ja)**

The title compound was isolated by column chromatography (eluent: EtOAc/petroleum ether = 1/5 to 1/2) as a yellow solid in 66% yield (49.3 mg, 0.132 mmol) following the general procedure A. Mp: 279–281°C. **<sup>1</sup>H NMR (DMSO, 400 MHz):** δ 10.99 (s, 1H), 10.65 (s, 1H), 8.17 (d, J = 7.1 Hz, 1H), 7.31 – 7.09 (m, 12H), 2.50 (s, 3H). **<sup>13</sup>C NMR (DMSO, 100 MHz):** δ 155.39, 141.91, 140.54, 138.68, 138.15, 135.40, 130.67, 129.99, 127.78, 127.16, 126.82, 126.68, 126.34, 121.16, 120.77, 120.01, 119.54, 118.55, 117.44, 111.81, 91.89, 17.32. **HRMS (ESI):** Calcd for C<sub>26</sub>H<sub>19</sub>N<sub>2</sub>O [M+H]<sup>+</sup> 375.1492, found: 375.1492.

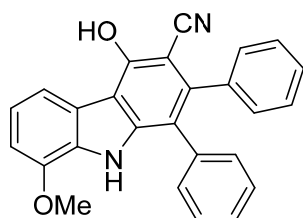

**4-Hydroxy-8-methoxy-1,2-diphenyl-9H-carbazole-3-carbonitrile (3ka)**

The title compound was isolated by column chromatography (eluent: EtOAc/petroleum ether = 1/5 to 1/2) as a yellow solid in 8% yield (4.7 mg, 0.012 mmol) following the general procedure B. Mp: 275–277 °C. **<sup>1</sup>H NMR (DMSO, 400 MHz):** δ 11.18 – 10.92 (m, 1H), 10.86 (s, 1H), 7.91 (d, J = 7.7 Hz, 1H), 7.27 (d, J = 13.9 Hz, 1H), 7.32 – 7.08 (m, 11H), 7.02 (d, J = 7.8 Hz, 1H), 3.90 (s, 3H). **<sup>13</sup>C NMR**

**(DMSO, 100 MHz):**  $\delta$  155.96, 145.80, 142.23, 140.80, 138.48, 135.74, 131.02, 130.42, 129.75, 128.21, 127.62, 127.30, 127.04, 122.96, 121.04, 119.26, 117.88, 114.87, 112.24, 106.82, 92.21, 55.47. **HRMS (ESI):** Calcd for  $C_{26}H_{19}N_2O_2$   $[M+H]^+$  391.1441, found: 391.1439.

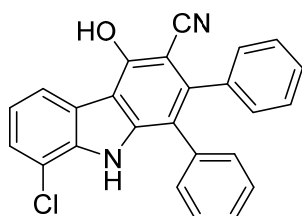

**8-Chloro-4-hydroxy-1,2-diphenyl-9H-carbazole-3-carbonitrile (3la)**

The title compound was isolated by column chromatography (eluent: EtOAc/petroleum ether = 1/5 to 1/2) as a yellow solid in 5% yield (2.96 mg, 0.0075 mmol) following the general procedure B. Mp: 256–258 °C.  **$^1H$  NMR (DMSO, 400 MHz):**  $\delta$  11.28 (s, 1H), 11.03 (s, 1H), 8.29 (d,  $J$  = 7.8 Hz, 1H), 7.49 (d,  $J$  = 7.5 Hz, 1H), 7.34 – 7.11 (m, 12H).  **$^{13}C$  NMR (DMSO, 100 MHz):**  $\delta$  155.99, 142.57, 142.02, 138.27, 136.82, 135.42, 131.02, 130.27, 128.15, 127.59, 127.37, 127.17, 125.66, 123.88, 121.45, 121.23, 119.38, 117.43, 115.72, 112.15, 93.14. **HRMS (ESI):** Calcd for  $C_{25}H_{16}ClN_2O$   $[M+H]^+$  395.0946, found: 395.0949.

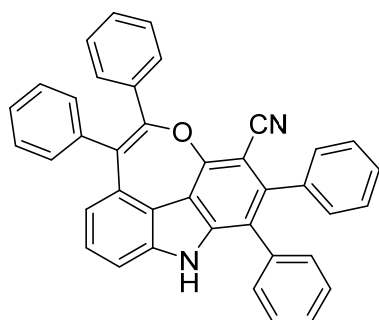

**3-Chloro-5,6,9,10-tetraphenyl-4H-oxepino[2,3,4,5-def]carbazole-7-carbonitrile (4aa)**

The title compound was isolated by column chromatography (eluent: EtOAc/petroleum ether = 1/5 to 1/2) as a yellow solid in 70% yield (56.3 mg, 0.105 mmol) following the general procedure B. Mp: > 300 °C.  **$^1H$  NMR ( $CDCl_3$ , 400 MHz):**  $\delta$  8.05 (s, 1H), 7.36 – 7.27 (m, 5H), 7.24 – 7.20 (m, 5H), 7.20 – 7.14 (m, 7H), 7.11 – 7.06 (m, 3H), 7.03 – 6.99 (m, 2H), 6.30 – 6.25 (m, 1H).  **$^{13}C$  NMR ( $CDCl_3$ , 100 MHz):**  $\delta$  156.04, 151.93, 142.38, 140.21, 139.18, 138.04, 137.74, 137.17, 135.28, 133.50, 131.96, 130.44, 130.07, 129.74, 128.81, 128.10, 127.82, 127.74, 127.69, 127.60, 127.30, 126.90, 122.43, 122.02, 121.48, 120.72, 115.83, 113.27, 110.98, 93.53. **HRMS (ESI):** Calcd for  $C_{39}H_{28}N_3O$   $[M+NH_4]^+$  554.2227, found: 554.2230.

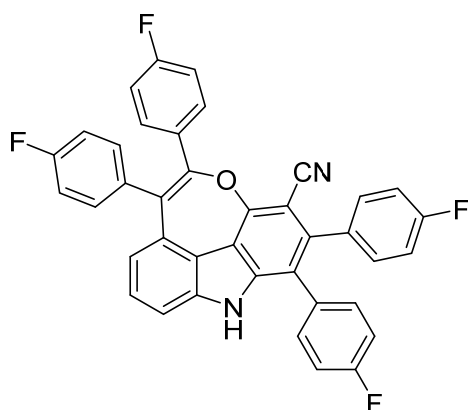

**5,6,9,10-Tetrakis(4-fluorophenyl)-4H-oxepino[2,3,4,5-def]carbazole-7-carbonitrile (4ad)**

The title compound was isolated by column chromatography (eluent: EtOAc/petroleum ether = 1/5 to 1/2) as a yellow solid in 63% yield (57.6 mg, 0.095mmol) following the general procedure B. Mp: > 300 °C. **<sup>1</sup>H NMR (DMSO, 400 MHz):** δ 11.38 (s, 1H), 7.36 (dd, J = 8.5, 5.7 Hz, 2H), 7.25 – 7.16 (m, 9H), 7.13 – 7.06 (m, 5H), 7.01 (t, J = 8.8 Hz, 2H), 6.08 (d, J = 7.5 Hz, 1H). **<sup>13</sup>C NMR (DMSO, 100 MHz):** δ 163.64, 163.24, 163.13, 161.17, 160.80, 160.70, 155.61, 151.04, 141.40, 139.93, 135.72, 135.38, 134.53, 134.46, 134.38, 133.44, 133.36, 133.29, 133.20, 132.90, 132.77, 132.69, 132.00, 128.37, 122.67, 121.94, 121.72, 120.87, 116.51, 116.44, 116.22, 116.18, 115.97, 115.81, 115.59, 115.52, 115.30, 113.59, 113.31, 92.52. **<sup>19</sup>F NMR (DMSO, 376 MHz):** δ -112.89, -114.13, -114.55, -114.76. **HRMS (ESI):** Calcd for C<sub>39</sub>H<sub>24</sub>F<sub>4</sub>N<sub>3</sub>O [M+NH<sub>4</sub>]<sup>+</sup> 626.1850, found: 626.1851.

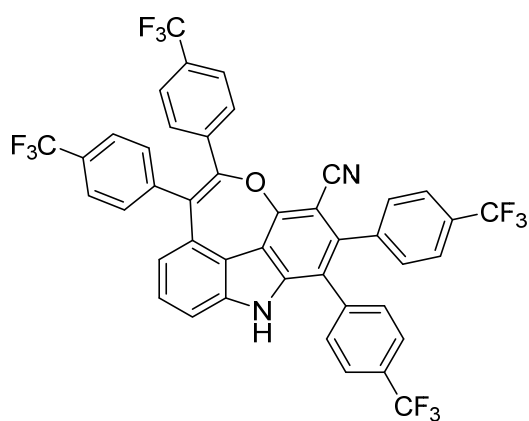

**5,6,9,10-Tetrakis(4-(trifluoromethyl)phenyl)-4H-oxepino[2,3,4,5-def]carbazole-7-carbonitrile (4ag)**

The title compound was isolated by column chromatography (eluent: EtOAc/petroleum ether = 1/5 to 1/2) as a yellow solid in 62% yield (74.8mg, 0.180 mmol) following the general procedure B. Mp: > 300 °C. **<sup>1</sup>H NMR (DMSO, 400 MHz):** δ 8.13 – 8.05 (m, 8H), 8.01 – 7.91 (m, 8H), 7.73 (d, J = 8.2 Hz, 1H), 7.61 (s, 1H), 6.61 (d, J = 7.5 Hz, 1H). **<sup>13</sup>C NMR (DMSO, 100 MHz):** δ 157.50, 152.44, 144.85, 143.86, 143.57, 142.70, 142.63, 141.35, 141.28, 134.75, 134.10, 133.46, 133.39, 132.67, 131.46, 131.28, 131.13, 130.81, 130.02, 127.58, 127.28, 126.87, 126.62, 125.02, 124.59, 123.84, 122.73, 122.69, 116.79, 115.27, 114.98, 94.75. **<sup>19</sup>F NMR (DMSO, 376 MHz):** δ -63.03, -63.09, -63.25. **HRMS (ESI):** Calcd for C<sub>39</sub>H<sub>24</sub>F<sub>12</sub>N<sub>3</sub>O [M+NH<sub>4</sub>]<sup>+</sup> 826.1722, found: 826.1726.

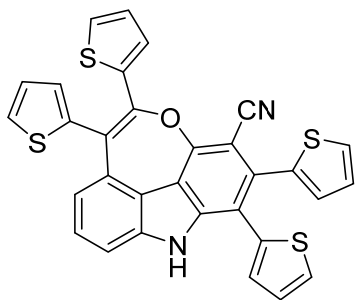

**5,6,9,10-Tetra(thiophen-2-yl)-4H-oxepino[2,3,4,5-def]  
carbazole-7-carbonitrile (4ah)**

The title compound was isolated by column chromatography (eluent: EtOAc/petroleum ether = 1/5 to 1/2) as a yellow solid in 39% yield (32.8 mg, 0.078 mmol) following the general procedure B. Mp: 280–282 °C. **<sup>1</sup>H NMR (DMSO, 400 MHz):** δ

11.66 (s, 1H), 7.82 (d, J = 5.1 Hz, 1H), 7.68 – 7.54 (m, 4H), 7.30 (d, J = 8.1 Hz, 1H), 7.25 – 7.13 (m, 6H), 7.11 – 7.07 (m, 1H), 7.00 – 6.96 (m, 1H), 6.34 (d, J = 7.6 Hz, 1H). **<sup>13</sup>C NMR (DMSO, 100 MHz):** δ 154.98, 145.80, 140.67, 139.31, 139.17, 138.67, 137.24, 134.75, 134.71, 132.42, 131.49, 130.51, 130.27, 129.54, 129.37, 128.71, 128.36, 128.15, 127.90, 127.33, 126.98, 126.15, 121.65, 119.18, 116.10, 115.30, 113.52, 112.91, 92.93. **HRMS (ESI):** Calcd for C<sub>31</sub>H<sub>20</sub>N<sub>3</sub>OS<sub>4</sub> [M+NH<sub>4</sub>]<sup>+</sup> 578.0484, found: 578.0477.

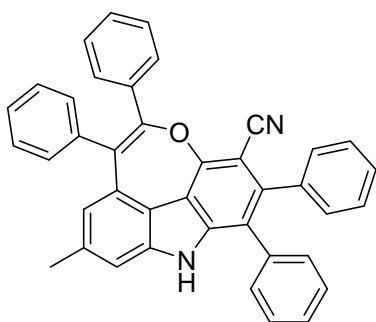

**2-Methyl-5,6,9,10-tetraphenyl-4H-oxepino[2,3,4,5-def]  
carbazole-7-carbonitrile (4ea)**

The title compound was isolated by column chromatography (eluent: EtOAc/petroleum ether = 1/5 to 1/2) as a yellow solid in 65% yield (53.6 mg, 0.097 mmol) following the general procedure B. Mp: 300–301 °C. **<sup>1</sup>H NMR (CDCl<sub>3</sub>, 400 MHz):**

δ 7.94 (s, 1H), 7.35 – 7.26 (m, 5H), 7.24 – 7.13 (m, 12H), 7.08 (d, J = 6.6 Hz, 3H), 6.81 (s, 1H), 6.10 (s, 1H), 2.21 (s, 3H). **<sup>13</sup>C NMR (CDCl<sub>3</sub>, 100 MHz):** δ 155.62, 152.04, 141.88, 140.13, 139.15, 138.28, 138.18, 137.66, 137.26, 135.40, 132.99, 131.99, 130.48, 130.09, 129.74, 128.78, 128.05, 127.80, 127.67, 127.62, 127.54, 127.28, 126.87, 123.61, 122.32, 120.65, 119.24, 115.90, 113.31, 110.97, 93.36, 22.22. **HRMS (ESI):** Calcd for C<sub>40</sub>H<sub>27</sub>N<sub>2</sub>O [M+H]<sup>+</sup> 551.2118, found: 551.2125.

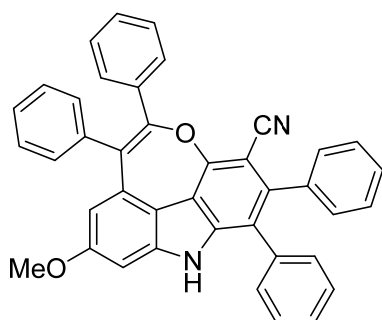

**2-Methoxy-5,6,9,10-tetraphenyl-4H-oxepino[2,3,4,5-def]  
carbazole-7-carbonitrile (5fa)**

The title compound was isolated by column chromatography (eluent: EtOAc/petroleum ether = 1/5 to 1/2) as a yellow solid



in 57% yield (58.4 mg, 0.085 mmol) following the general procedure B. Mp: 277–278 °C. **<sup>1</sup>H NMR (CDCl<sub>3</sub>, 400 MHz):** δ 8.05 (s, 1H), 7.40 – 7.36 (m, 3H), 7.34 (d, J = 5.0 Hz, 2H), 7.27 (s, 4H), 7.26 – 7.19 (m, 7H), 7.15 (d, J = 6.1 Hz, 3H), 6.56 (s, 1H), 6.01 (s, 1H), 3.73 (s, 3H). **<sup>13</sup>C NMR (CDCl<sub>3</sub>, 100 MHz):** δ 160.28, 154.88, 152.65, 141.08, 140.11, 138.95, 138.88, 138.12, 137.25, 135.38, 134.14, 131.91, 130.51, 130.06, 129.70, 128.76, 128.09, 127.79, 127.69, 127.63, 127.52, 127.29, 126.94, 121.63, 120.63, 115.92, 115.07, 113.34, 112.28, 93.97, 55.44. **HRMS (ESI):** Calcd for C<sub>40</sub>H<sub>27</sub>N<sub>2</sub>O<sub>2</sub> [M+H]<sup>+</sup> 567.2067, found: 567.2072.

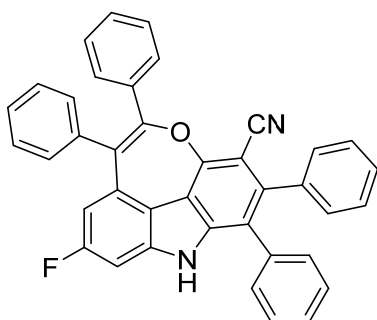

**2-Fluoro-5,6,9,10-tetraphenyl-4H-oxepino[2,3,4,5-def]  
carbazole-7-carbonitrile (4ga)**

The title compound was isolated by column chromatography (eluent: EtOAc/petroleum ether = 1/5 to 1/2) as a yellow solid in 62% yield (51.5mg, 0.093 mmol) following the general procedure B. Mp: > 300 °C. **<sup>1</sup>H NMR (CDCl<sub>3</sub>, 400 MHz):** δ 8.06 (s, 1H), 7.35 – 7.26 (m, 5H), 7.25 – 7.12 (m, 12H), 7.09 (d, J = 4.6 Hz, 3H), 6.73 – 6.66 (m, 1H), 6.04 (d, J = 11.6 Hz, 1H). **<sup>13</sup>C NMR (CDCl<sub>3</sub>, 100 MHz):** δ 164.06, 161.66, 155.32, 153.10, 142.19, 140.65, 138.54, 138.07, 137.94, 137.79, 136.98, 135.03, 134.97, 134.87, 131.81, 130.41, 129.99, 129.64, 128.89, 128.31, 127.93, 127.87, 127.82, 127.73, 127.37, 127.20, 121.31, 120.92, 117.75, 115.61, 113.05, 110.80, 110.53, 97.71, 97.43, 93.99. **<sup>19</sup>F NMR (CDCl<sub>3</sub>, 376 MHz):** 19F NMR (376 MHz, ) δ -112.58. **HRMS (ESI):** Calcd for C<sub>39</sub>H<sub>27</sub>FN<sub>3</sub>O [M+NH<sub>4</sub>]<sup>+</sup> 572.2133, found: 572.2134.

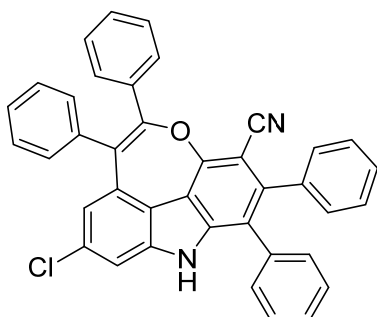

**2-Chloro-5,6,9,10-tetraphenyl-4H-oxepino[2,3,4,5-def]  
carbazole-7-carbonitrile (4ha)**

The title compound was isolated by column chromatography (eluent: EtOAc/petroleum ether = 1/5 to 1/2) as a white solid in 69% yield (59.2mg, 0.104 mmol) following the general procedure B. Mp: > 300 °C. **<sup>1</sup>H NMR (CDCl<sub>3</sub>, 400 MHz):** δ 8.14 (s, 1H), 7.35 – 7.29 (m, 5H), 7.27 – 7.21 (m, 6H), 7.20 – 7.15 (m, 5H), 7.15 – 7.13 (m, 1H), 7.10 (dd, J = 5.1, 1.9 Hz, 3H), 7.02 (d, J = 1.5 Hz, 1H), 6.26 (d, J = 1.5 Hz, 1H). **<sup>13</sup>C**

**NMR (CDCl<sub>3</sub>, 100 MHz):**  $\delta$  155.59, 153.05, 142.68, 140.51, 138.37, 138.08, 137.79, 136.94, 134.93, 134.49, 133.08, 131.79, 130.34, 129.99, 129.59, 128.85, 128.34, 127.87, 127.71, 127.34, 127.23, 122.32, 121.37, 120.98, 119.98, 115.60, 112.94, 110.89, 93.91. **HRMS (ESI):** Calcd for C<sub>39</sub>H<sub>27</sub>ClN<sub>3</sub>O [M+NH<sub>4</sub>]<sup>+</sup> 588.1837, found: 588.1841.

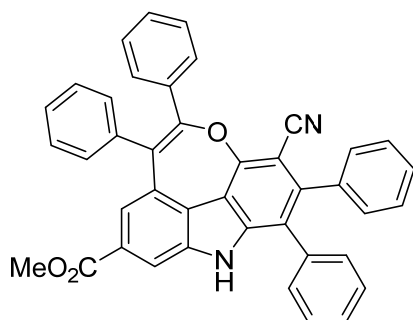

**Methyl 7-cyano-5,6,9,10-tetraphenyl-4H-oxepino[2,3,4,5-def]carbazole-2-carboxylate (4ia)**

The title compound was isolated by column chromatography (eluent: EtOAc/petroleum ether = 1/5 to 1/2) as a white solid in 68% yield (60.8mg, 0.0102 mmol) following the general procedure B. Mp: > 300 °C. **<sup>1</sup>H NMR**

**(CDCl<sub>3</sub>, 400 MHz):**  $\delta$  8.26 (s, 1H), 7.80 (d, J = 1.0 Hz, 1H), 7.37 – 7.30 (m, 5H), 7.28 (s, 1H), 7.26 – 7.23 (m, 5H), 7.22 – 7.15 (m, 7H), 7.11 (dd, J = 5.2, 1.9 Hz, 3H), 7.01 (d, J = 1.0 Hz, 1H), 3.80 (s, 3H). **<sup>13</sup>C NMR (CDCl<sub>3</sub>, 100 MHz):**  $\delta$  166.89, 156.44, 152.48, 143.64, 141.50, 138.55, 137.85, 137.22, 136.90, 134.89, 133.34, 131.79, 130.31, 130.01, 129.69, 129.06, 128.90, 128.34, 127.90, 127.79, 127.35, 127.26, 125.15, 122.76, 122.10, 120.96, 115.49, 113.00, 112.86, 94.03, 52.20. **HRMS (ESI):** Calcd for C<sub>41</sub>H<sub>30</sub>N<sub>3</sub>O<sub>3</sub> [M+NH<sub>4</sub>]<sup>+</sup> 612.2282, found: 612.2292.

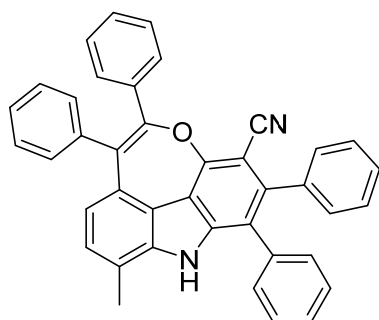

**3-Methyl-5,6,9,10-tetraphenyl-4H-oxepino[2,3,4,5-def]carbazole-7-carbonitrile (4ja)**

The title compound was isolated by column chromatography (eluent: EtOAc/petroleum ether = 1/5 to 1/2) as a white solid in 78% yield (64.1 mg, 0.116 mmol) following the general procedure B. Mp: > 300 °C. **<sup>1</sup>H NMR (CDCl<sub>3</sub>, 400 MHz):**  $\delta$

11.10 (s, 1H), 7.33 – 7.26 (m, 5H), 7.25 – 7.09 (m, 15H), 6.89 (d, J = 7.8 Hz, 1H), 6.04 (d, J = 7.7 Hz, 1H), 2.39 (s, 3H). **<sup>13</sup>C NMR (CDCl<sub>3</sub>, 100 MHz):**  $\delta$  154.73, 149.71, 141.60, 140.50, 138.73, 138.32, 137.88, 137.57, 134.82, 131.44, 130.59, 130.06, 129.64, 129.50, 128.05, 127.78, 127.54, 127.49, 127.34, 127.26, 126.89, 122.93, 122.60, 121.85, 121.53, 119.81, 115.66, 112.99, 91.80, 17.18. **HRMS (ESI):** Calcd for C<sub>40</sub>H<sub>30</sub>N<sub>3</sub>O [M+NH<sub>4</sub>]<sup>+</sup> 568.2383, found: 568.2392.

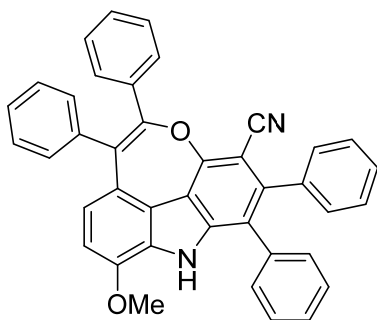

**3-Methoxy-5,6,9,10-tetraphenyl-4H-oxepino[2,3,4,5-def]  
carbazole-7-carbonitrile (4ka)**

The title compound was isolated by column chromatography (eluent: EtOAc/petroleum ether = 1/5 to 1/2) as a white solid in 77% yield (65.7 mg, 0.116 mmol) following the general procedure B. Mp: > 300 °C. **<sup>1</sup>H NMR (CDCl<sub>3</sub>, 400 MHz):** δ

8.15 (s, 1H), 7.36 – 7.27 (m, 5H), 7.24 – 7.14 (m, 12H), 7.09 (d, J = 7.3 Hz, 3H), 6.45 (d, J = 8.3 Hz, 1H), 6.21 (d, J = 8.2 Hz, 1H), 3.86 (s, 3H). **<sup>13</sup>C NMR (CDCl<sub>3</sub>, 100 MHz):** <sup>13</sup>C NMR (101 MHz, ) δ 156.05, 149.88, 145.76, 142.23, 139.82, 139.48, 138.20, 137.23, 135.28, 131.94, 130.47, 130.14, 129.84, 128.77, 128.02, 127.92, 127.80, 127.70, 127.54, 127.46, 127.25, 126.80, 125.84, 123.12, 122.42, 122.05, 120.78, 115.89, 113.31, 106.56, 93.53, 55.44. **HRMS (ESI):** Calcd for C<sub>40</sub>H<sub>30</sub>N<sub>3</sub>O<sub>2</sub> [M+NH<sub>4</sub>]<sup>+</sup> 584.2333, found: 584.2342.

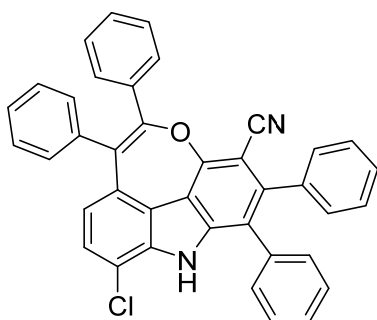

**3-Chloro-5,6,9,10-tetraphenyl-4H-oxepino[2,3,4,5-def]  
carbazole-7-carbonitrile (4la)**

The title compound was isolated by column chromatography (eluent: EtOAc/petroleum ether = 1/5 to 1/2) as a white solid in 60% yield (51.4 mg, 0.090 mmol) following the general procedure B. Mp: > 300 °C. **<sup>1</sup>H NMR (CDCl<sub>3</sub>, 400 MHz):** δ

11.39 (s, 1H), 7.37 – 7.07 (m, 20H), 6.92 (dd, J = 9.1, 1.7 Hz, 1H), 5.80 – 5.76 (m, 1H). **<sup>13</sup>C NMR (CDCl<sub>3</sub>, 100 MHz):** δ 162.89, 160.52, 154.12, 152.20, 141.32, 140.89, 139.40, 139.26, 137.88, 137.64, 137.19, 134.62, 133.75, 133.65, 131.33, 130.18, 130.09, 129.36, 128.34, 128.21, 127.87, 127.62, 127.56, 127.40, 127.34, 127.18, 121.59, 121.12, 116.56, 115.38, 112.08, 109.03, 108.75, 98.65, 98.39, 92.03. **HRMS (ESI):** Calcd for C<sub>39</sub>H<sub>27</sub>ClN<sub>3</sub>O [M+NH<sub>4</sub>]<sup>+</sup> 588.1837, found: 588.1840.

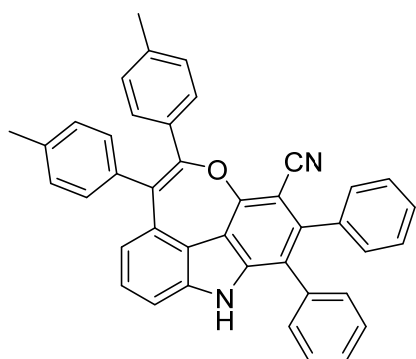

**5,6-Diphenyl-9,10-di-p-tolyl-4H-oxepino[2,3,4,5-def]  
carbazole-7-carbonitrile (4ak)**

The title compound was isolated by column chromatography (eluent: EtOAc/petroleum ether = 1/5 to 1/2) as a white solid in 94% yield (53.3 mg, 0.094 mmol) following the general procedure C. Mp: > 300 °C. **<sup>1</sup>H NMR**

**(CDCl<sub>3</sub>, 400 MHz):** δ 8.00 (s, 1H), 7.33 – 7.27 (m, 3H), 7.24 – 7.14 (m, 8H), 7.09 – 6.99 (m, 6H), 6.90 (d, *J* = 8.1 Hz, 2H), 6.30 (dd, *J* = 5.7, 2.6 Hz, 1H), 2.31 (s, 3H), 2.22 (s, 3H). **<sup>13</sup>C NMR (CDCl<sub>3</sub>, 100 MHz):** δ 156.29, 151.70, 142.36, 140.18, 137.75, 137.37, 137.25, 136.44, 136.40, 135.37, 135.30, 133.91, 131.78, 131.42, 130.47, 130.10, 129.73, 129.06, 128.87, 128.80, 127.99, 127.81, 127.71, 127.57, 127.23, 122.35, 122.06, 121.53, 120.58, 115.93, 113.53, 110.68, 93.54, 29.69, 21.23. **HRMS (ESI):** Calcd for C<sub>41</sub>H<sub>28</sub>N<sub>2</sub>NaO [M+Na]<sup>+</sup> 587.2094, found: 587.2098.

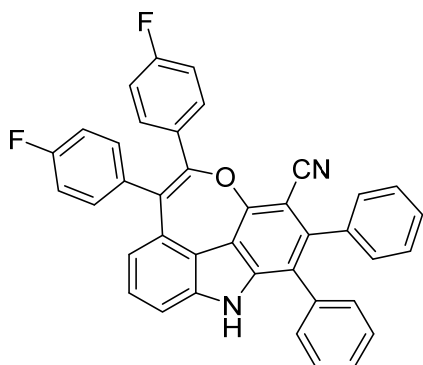

**9,10-Bis(4-fluorophenyl)-5,6-diphenyl-4H-oxepino[2,3,4,  
5-def]carbazole-7-carbonitrile (4al)**

The title compound was isolated by column chromatography (eluent: EtOAc/petroleum ether = 1/5 to 1/2) as a white solid in 89% yield (51.1 mg, 0.089 mmol) following the general procedure C. Mp: > 300 °C. **<sup>1</sup>H**

**NMR (CDCl<sub>3</sub>, 400 MHz):** δ 8.07 (s, 1H), 7.33 – 7.28 (m, 5H), 7.24 – 7.21 (m, 3H), 7.19 – 7.10 (m, 6H), 7.07 – 7.02 (m, 2H), 6.94 (t, *J* = 8.6 Hz, 2H), 6.80 (t, *J* = 8.7 Hz, H), 6.25 (dd, *J* = 4.8, 3.5 Hz, 1H). **<sup>13</sup>C NMR (CDCl<sub>3</sub>, 100 MHz):** δ 163.04, 162.97, 160.52, 155.75, 151.04, 142.46, 140.25, 137.82, 137.07, 135.17, 135.02, 134.99, 134.12, 133.53, 133.45, 133.17, 131.66, 131.58, 130.40, 130.05, 128.85, 127.87, 127.83, 127.68, 127.37, 121.90, 121.77, 121.35, 120.93, 115.76, 115.44, 115.23, 114.66, 114.45, 113.17, 111.26, 93.61. **<sup>19</sup>F NMR (DMSO, 376 MHz):** δ -117.33, -119.20. **HRMS (ESI):** Calcd for C<sub>39</sub>H<sub>22</sub>F<sub>2</sub>N<sub>2</sub>NaO [M+Na]<sup>+</sup> 595.1592, found: 595.1598.

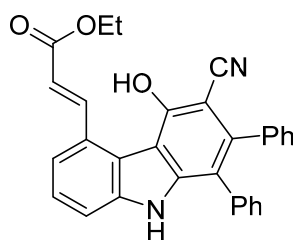

**Ethyl (E)-3-(6-cyano-5-hydroxy-7,8-diphenyl-9H-carbazol-4-yl)acrylate (6aa)**

The title compound was isolated by column chromatography (eluent: EtOAc/petroleum ether = 1/5 to 1/2) as a yellow solid in 38% yield

(17.5 mg, 0.038 mmol) following the general procedure C. Mp: 250–252 °C. **<sup>1</sup>H NMR (CDCl<sub>3</sub>, 400 MHz):** δ 11.52 (s), 11.27 (s), 9.60 (d, *J* = 15.8 Hz), 7.68 (d, *J* = 7.4 Hz), 7.63 (d, *J* = 8.0 Hz), 7.45 (t, *J* = 7.7 Hz), 7.34 – 7.24 (m), 7.19 (d, *J* = 4.7 Hz), 6.56 (d, *J* = 15.8 Hz), 4.26 (q, *J* = 7.1 Hz), 1.33 (t, *J* = 7.0 Hz). **<sup>13</sup>C NMR (CDCl<sub>3</sub>, 100 MHz):** δ 166.51, 155.03, 147.02, 142.78, 141.36, 140.87, 137.92, 135.47, 130.75, 130.14, 129.08, 128.32, 127.51, 127.30, 127.17, 125.92, 120.61, 119.28, 118.50, 117.84, 113.54, 111.89, 93.25, 59.81, 14.30. **HRMS (ESI):** Calcd for C<sub>30</sub>H<sub>26</sub>N<sub>3</sub>O<sub>3</sub> [M+NH<sub>4</sub>]<sup>+</sup> 476.1969, found: 476.1974.

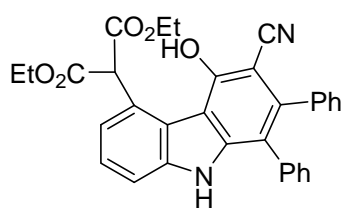

**Diethyl 2-(6-cyano-5-hydroxy-7,8-diphenyl-9H-carbazol-4-yl)malonate (8aa)**

The title compound was isolated by column chromatography (eluent: EtOAc/petroleum ether = 1/5 to 1/2) as a yellow solid in

37% yield (19.4 mg, 0.037 mmol) following the general procedure D. Mp: 216–218 °C. **<sup>1</sup>H NMR (CDCl<sub>3</sub>, 400 MHz):** δ 11.56 (s), 11.27 (s), 7.58 (d, *J* = 8.1 Hz), 7.45 (t, *J* = 7.8 Hz), 7.36 – 7.25 (m), 7.23 – 7.17 (m), 7.14 (d, *J* = 7.5 Hz), 6.78 (s), 4.30 – 4.17 (m), 1.25 (t, *J* = 7.1 Hz). **<sup>13</sup>C NMR (CDCl<sub>3</sub>, 100 MHz):** δ 166.51, 155.03, 147.02, 142.78, 141.36, 140.87, 137.92, 135.47, 130.75, 130.14, 129.08, 128.32, 127.51, 127.30, 127.17, 125.92, 120.61, 119.28, 118.50, 117.84, 113.54, 111.89, 93.25, 59.81, 14.30. **HRMS (ESI):** Calcd for C<sub>32</sub>H<sub>27</sub>N<sub>2</sub>O<sub>5</sub> [M+NH<sub>4</sub>]<sup>+</sup> 519.1914, found: 519.1915.

## Mechanism Research:

### Reaction (eq 3)

An oven-dried reaction vessel was charged with  $[\text{Cp}^*\text{RhCl}_2]_2$  (6.2 mg, 0.01 mmol),  $\text{Cu}(\text{OAc})_2 \cdot \text{H}_2\text{O}$  (80 mg, 0.4 mmol), 4-hydroxy-1,2-diphenyl-9*H*-carbazole-3-carbonitrile **3aa** (86.4 mg, 0.24 mmol), alkyne (**2a**) (35.6 mg 0.2 mmol) DMF (0.5 mL) under Ar. The vessel was sealed and heated at 100 °C (oil bath) for 12 h. After removal of solvents, the residue was purified by flash column chromatography on silica gel (eluent: DCM/petroleum ether = 1:2). **4aa** was obtained in 93% yield.

### H/D Exchange Reaction (eq 5).

An oven-dried reaction vessel was charged with  $[\text{Cp}^*\text{RhCl}_2]_2$  (6.2 mg, 0.01 mmol),  $\text{Cu}(\text{OAc})_2 \cdot \text{H}_2\text{O}$  (100 mg, 0.5 mmol), 3-(1*H*-indol-3-yl)-3-oxopropanenitrile **1a** (36.8 mg, 0.2 mmol), DMF (0.5 mL), and  $\text{CD}_3\text{OD}$  (0.15 mL) under Ar. The vessel was sealed and heated at 100 °C (oil bath) for 1 h. After removal of solvents, the residue was purified by flash column chromatography on silica gel (eluent: EtOAc/ petroleum ether = 1:2). **1a** was recovered in 90% yield.

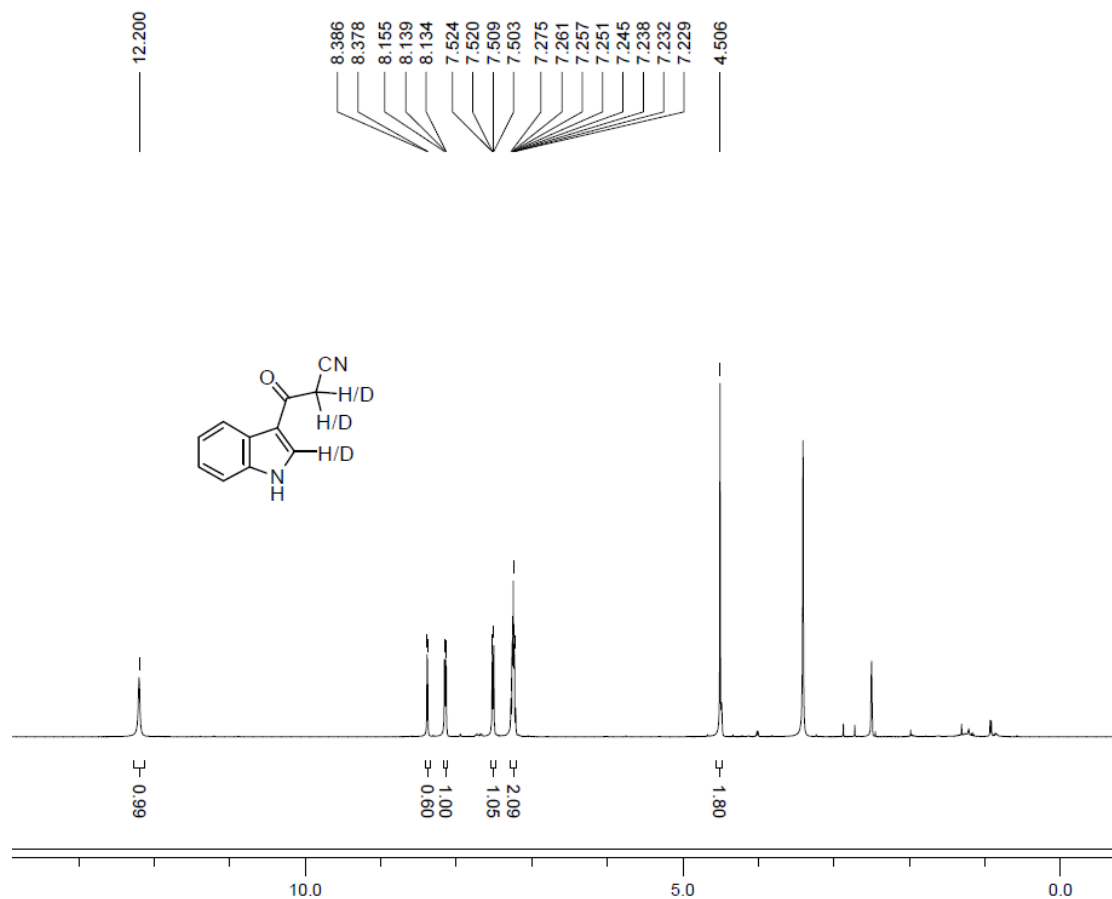

### H/D Exchange Reaction (eq 6).

An oven-dried reaction vessel was charged with  $[\text{Cp}^*\text{RhCl}_2]_2$  (3.1 mg, 0.005 mmol),  $\text{Cu}(\text{OAc})_2 \cdot \text{H}_2\text{O}$  (50 mg, 0.25 mmol), 4-hydroxy-1,2-diphenyl-9*H*-carbazole-3-carbonitrile **3aa** (36.6 mg, 0.1 mmol), DMF (0.5 mL), and  $\text{CD}_3\text{OD}$  (0.15 mL) under Ar. The vessel was sealed and heated at 100 °C (oil bath) for 1 h. After removal of solvents, the residue was purified by flash column chromatography on silica gel (eluent: EtOAc/ petroleum ether = 1:2). **1a** was recovered in 90% yield.

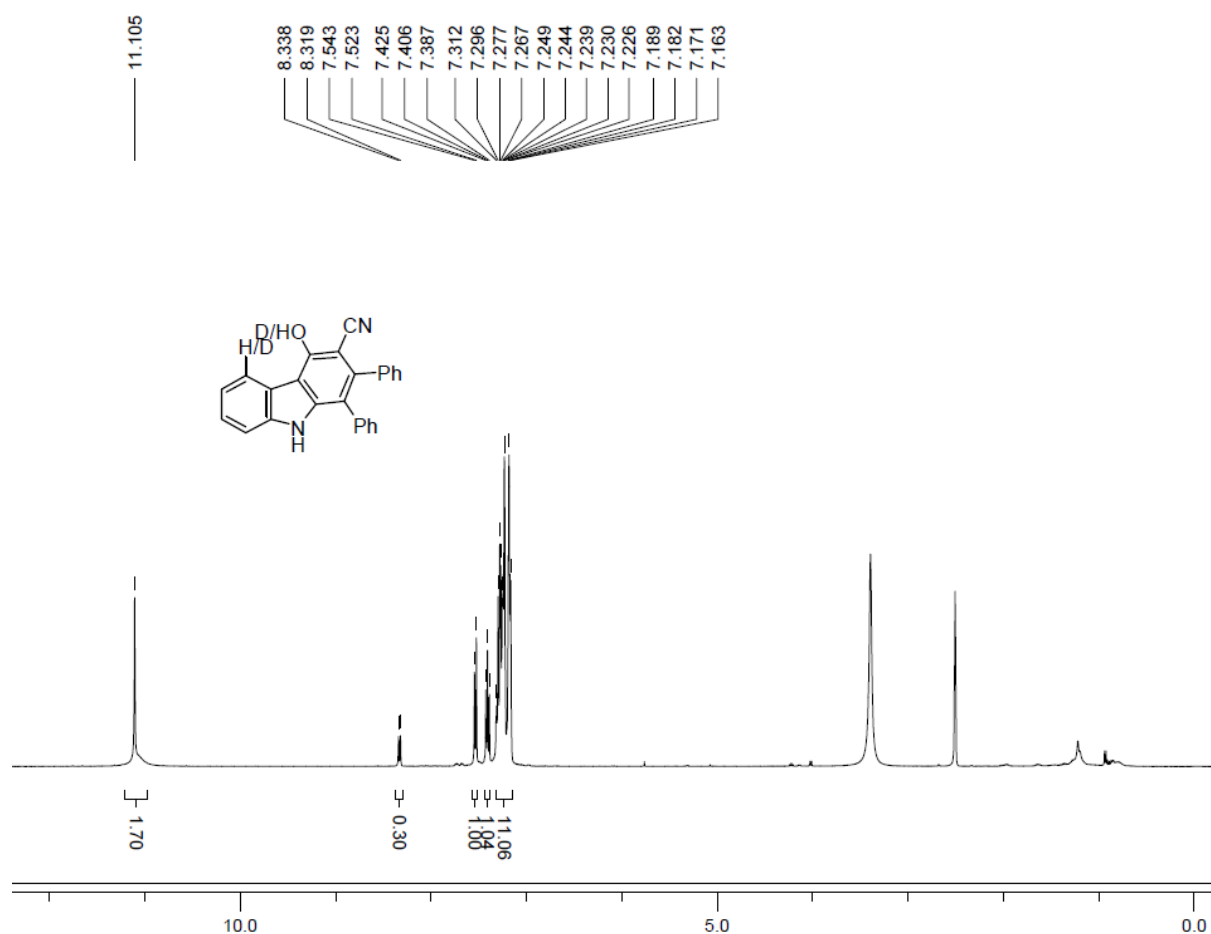

### X-ray crystallography:

CCDC-1537356 (**3ad**) and 1537357 (**4aa**), contain the supplementary crystallographic data. These data can be obtained free of charge from The Cambridge Crystallographic Data Centre via [www.ccdc.cam.ac.uk/data\\_request/cif](http://www.ccdc.cam.ac.uk/data_request/cif).

**Figure S1.** The molecular structure of **3ad**. Thermal ellipsoids are shown at the 30% level. Hydrogen atoms have been omitted for clarity.

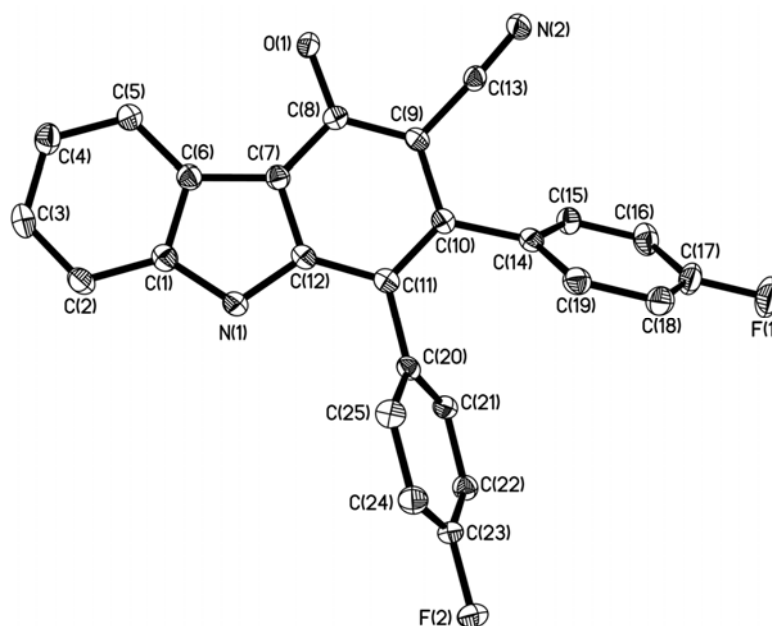

**Figure S2.** The molecular structure of **4aa**. Thermal ellipsoids are shown at the 30% level. Hydrogen atoms have been omitted for clarity.

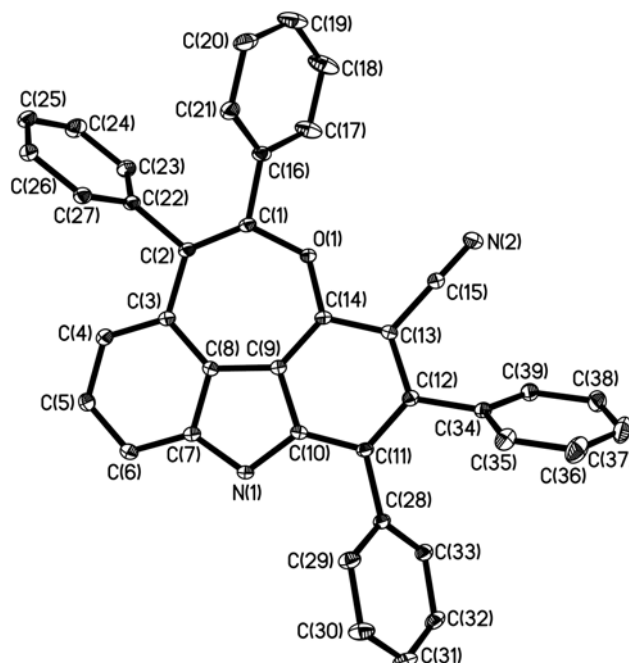



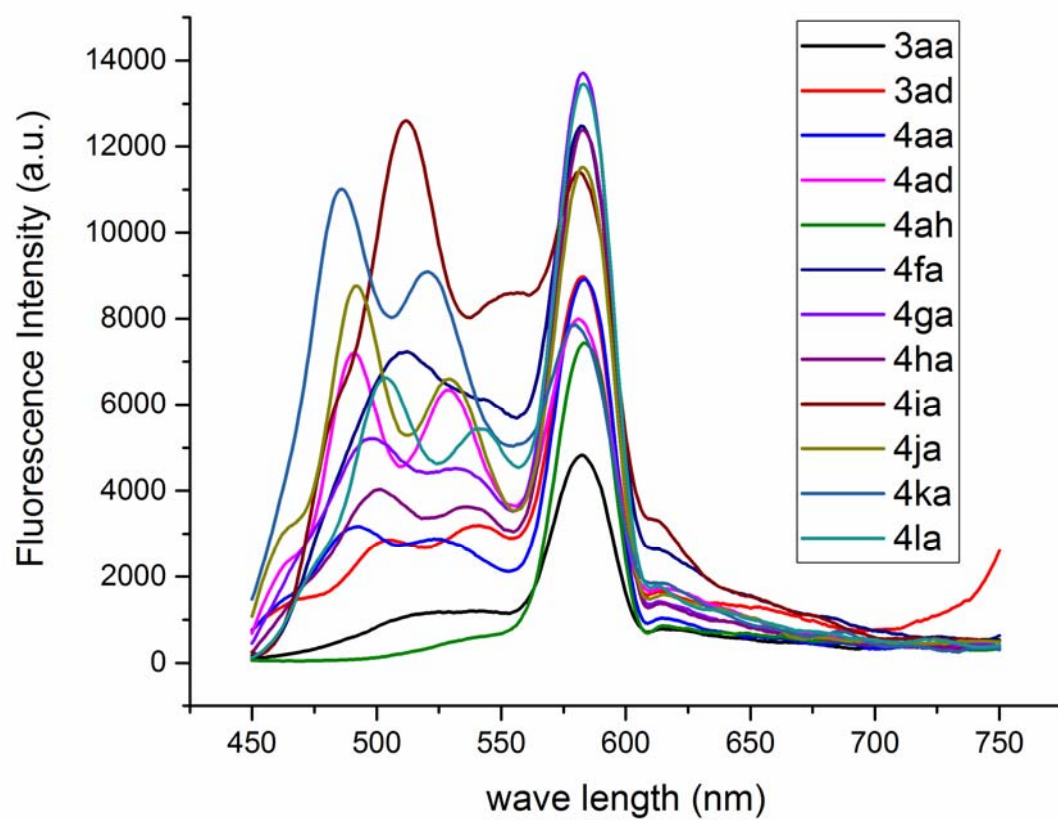

**Figure S3.** Fluorescence spectra of **3aa**, **3ad**, **4aa**, **4ah** and **4fa-4la** in the solid-state.

# Spectral Copies of $^1\text{H}$ , $^{13}\text{C}$ , and $^{19}\text{F}$ NMR of Compounds Obtained in This Study

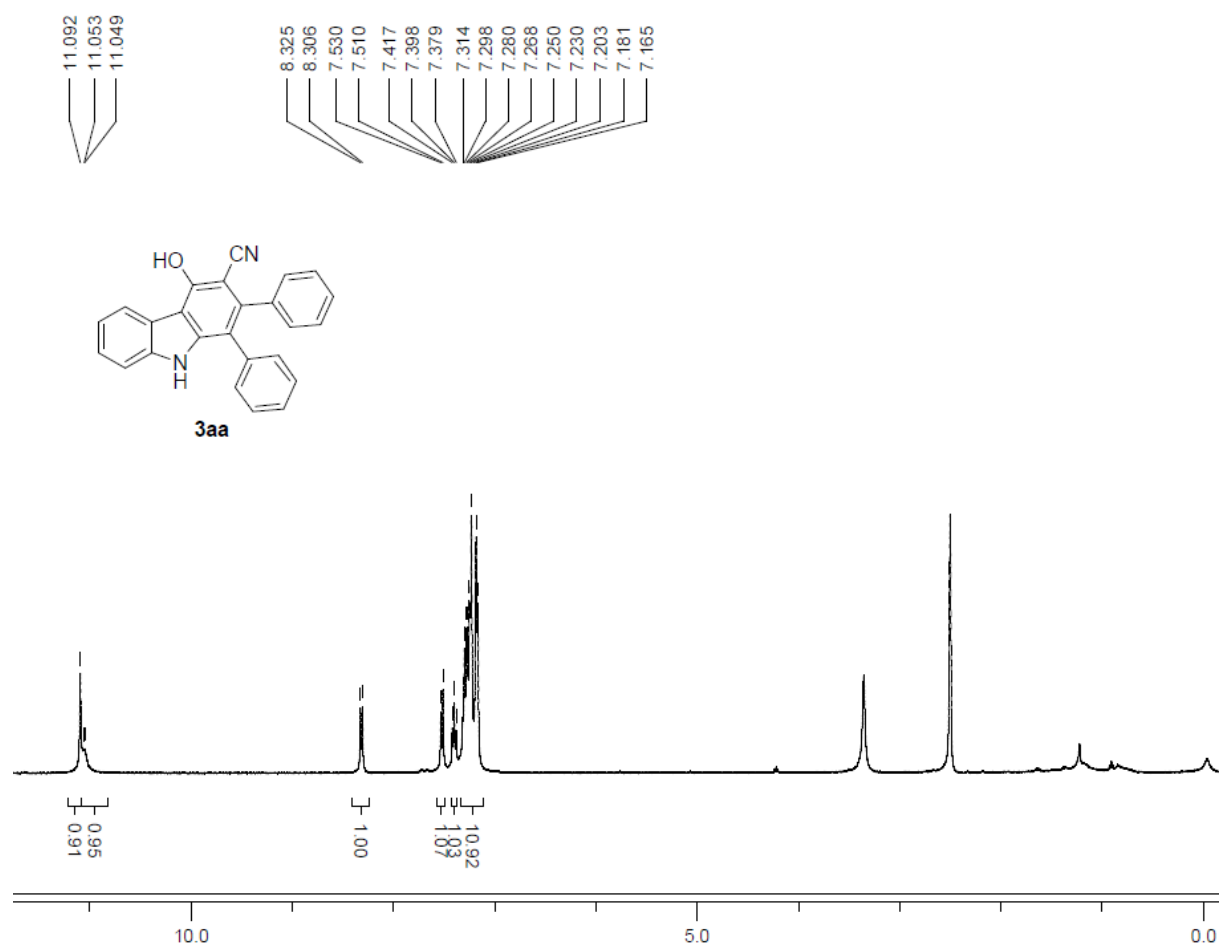

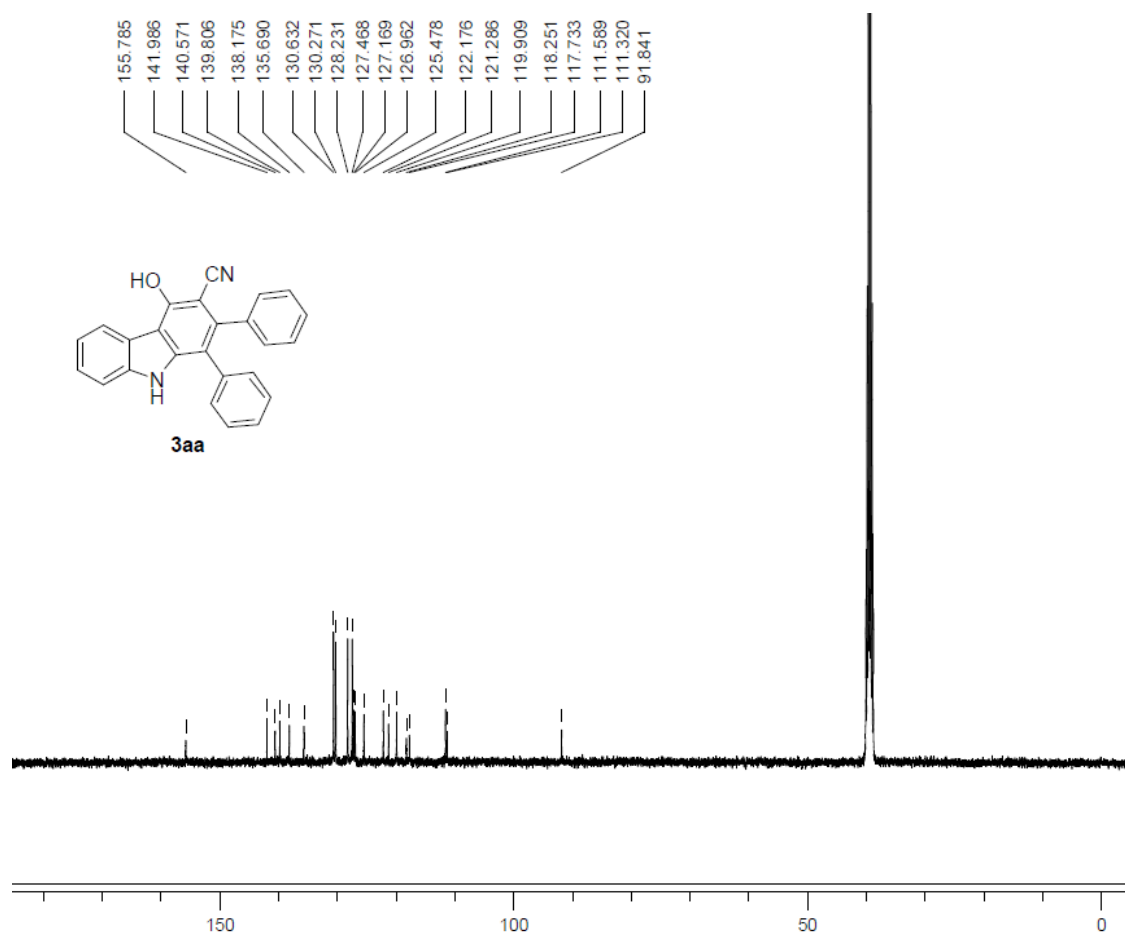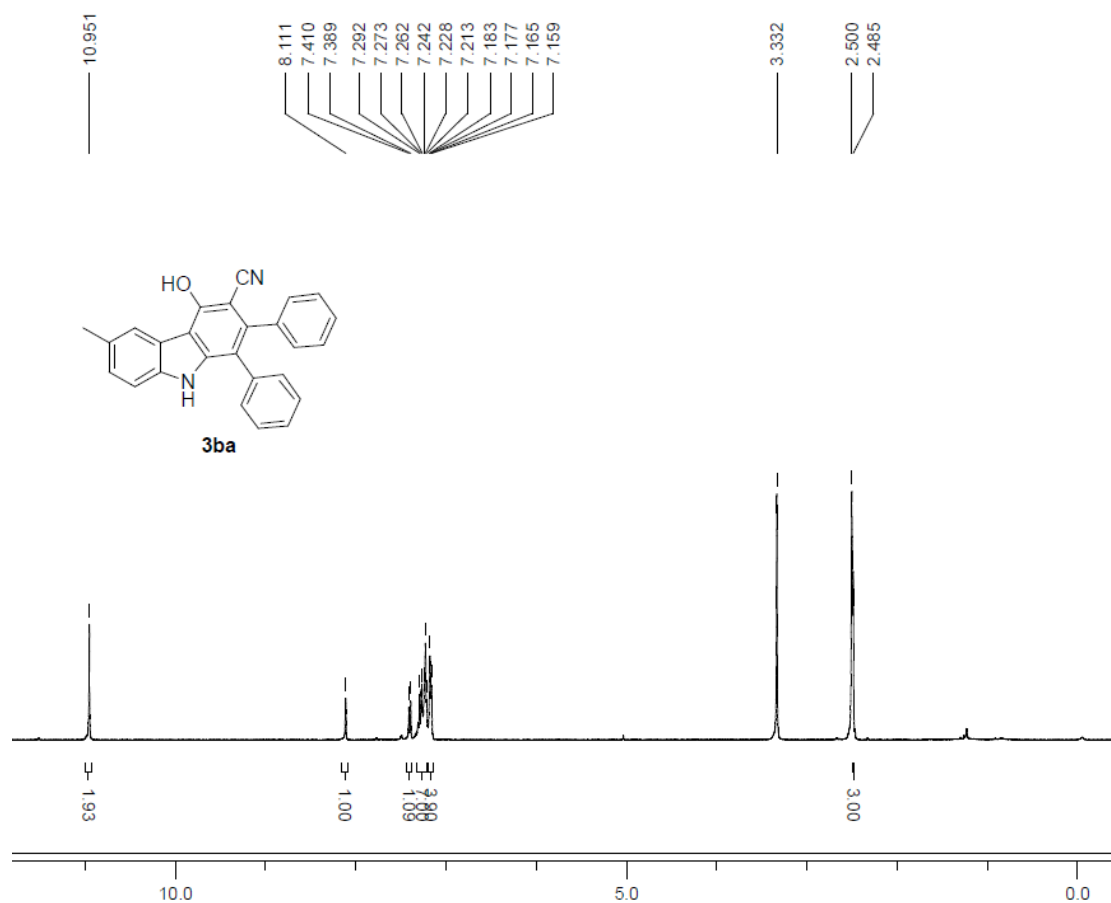

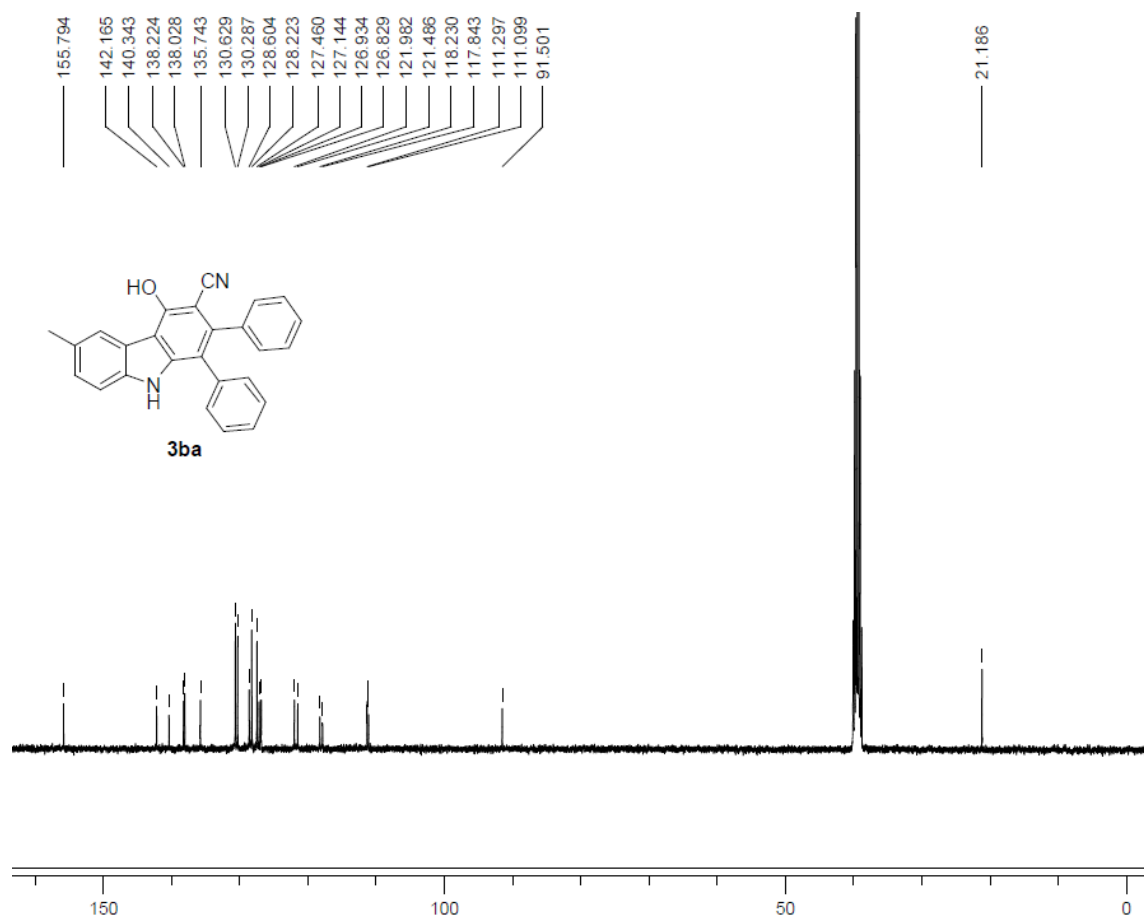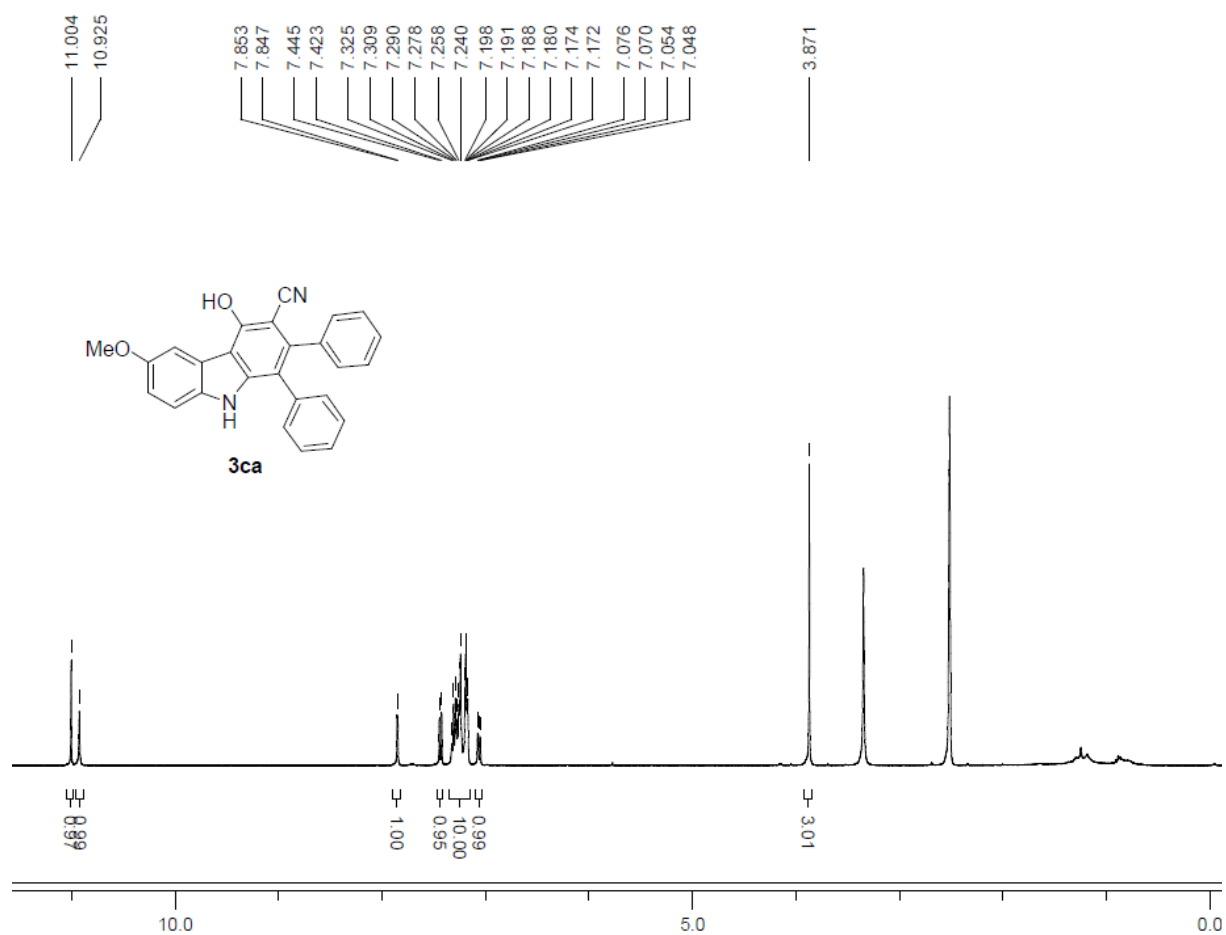

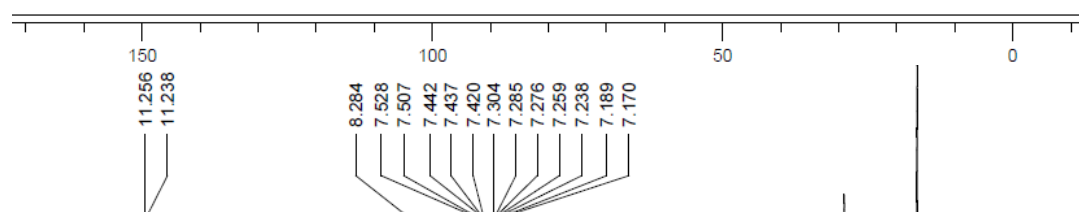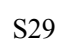

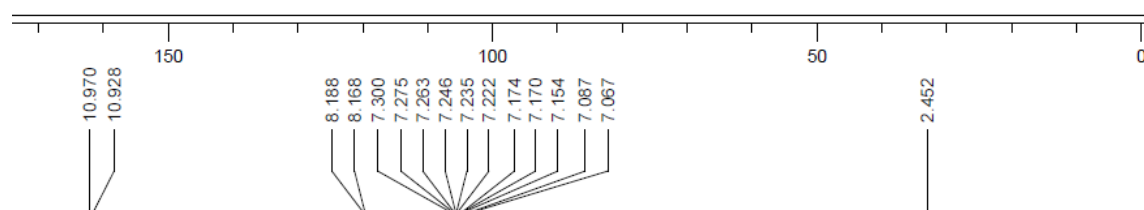

3da

3ea

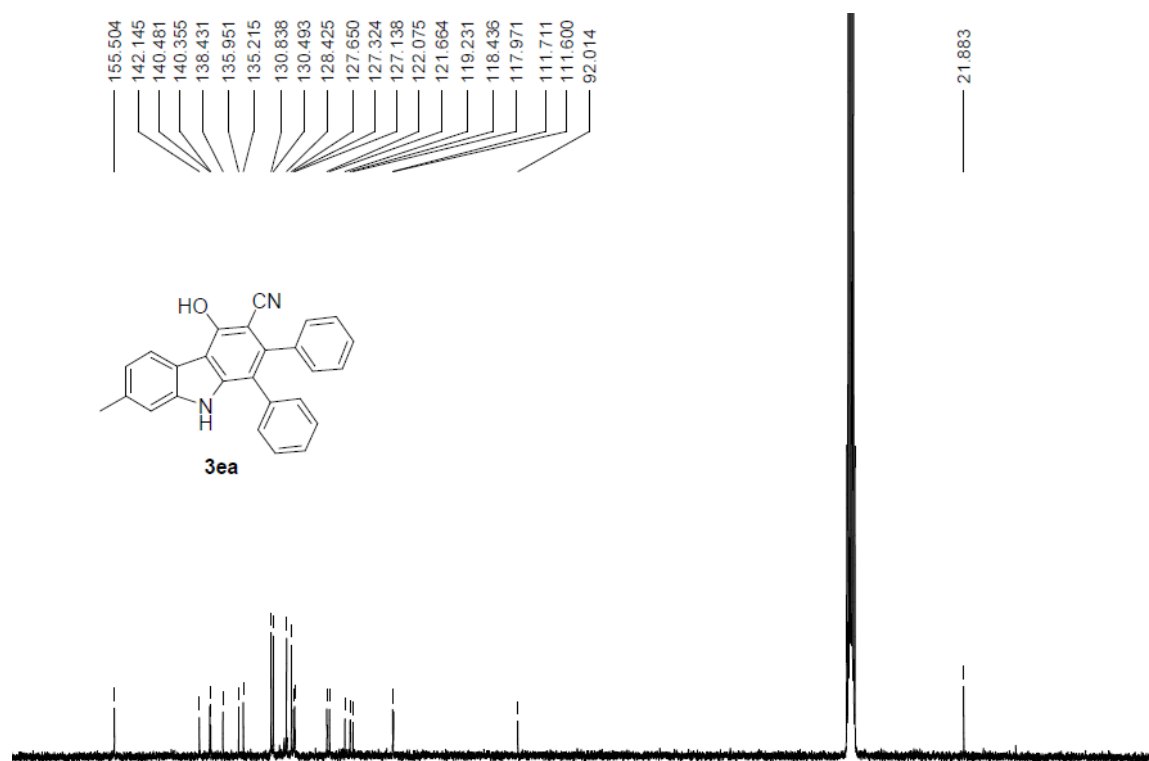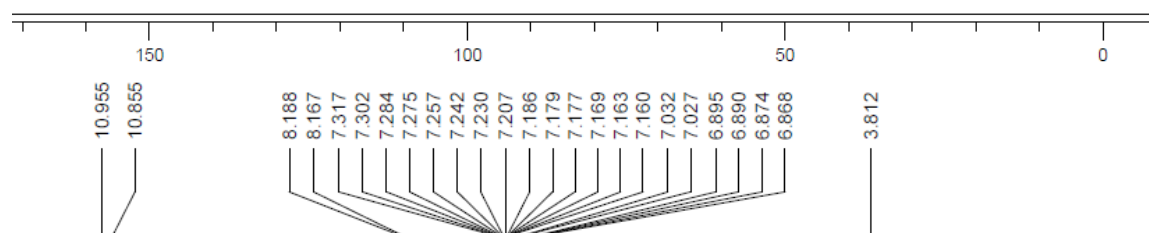

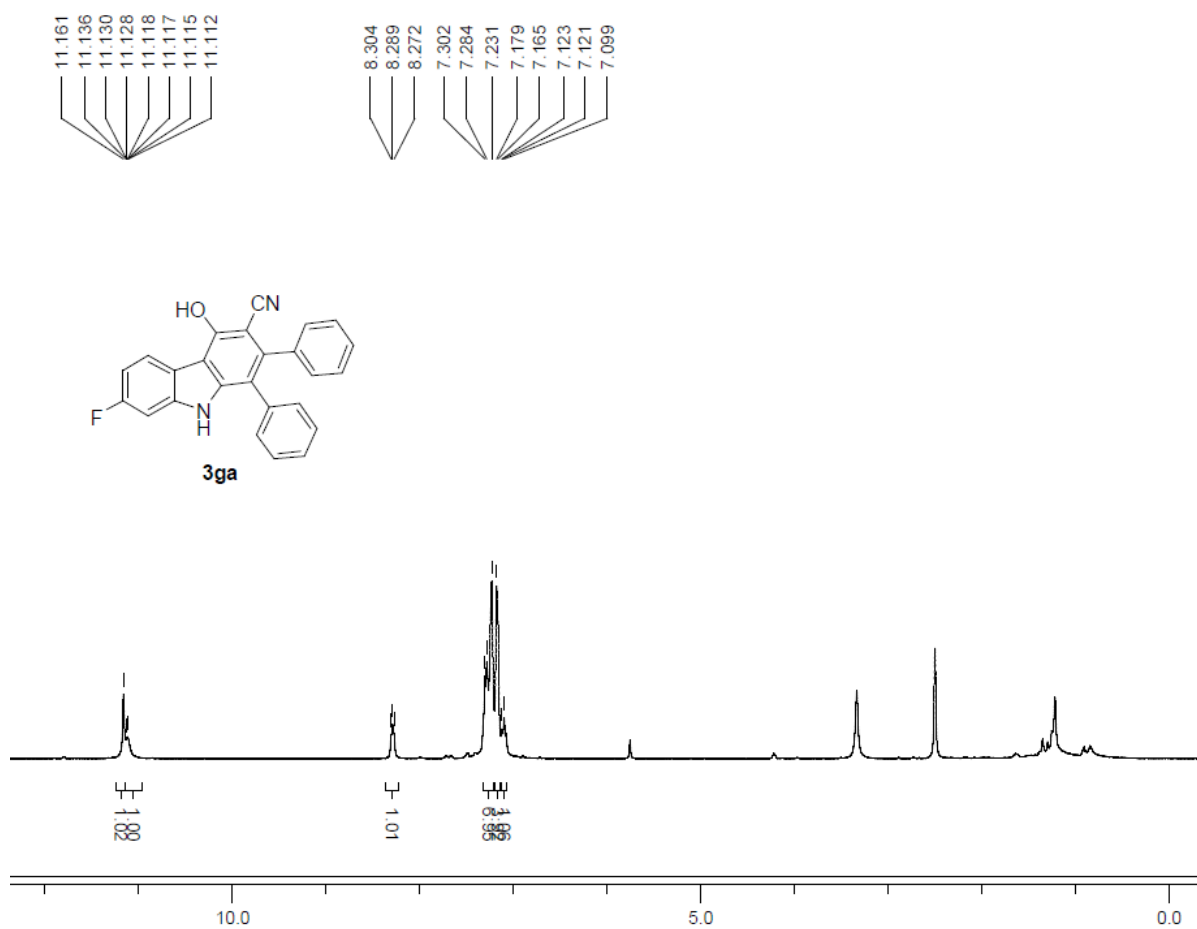



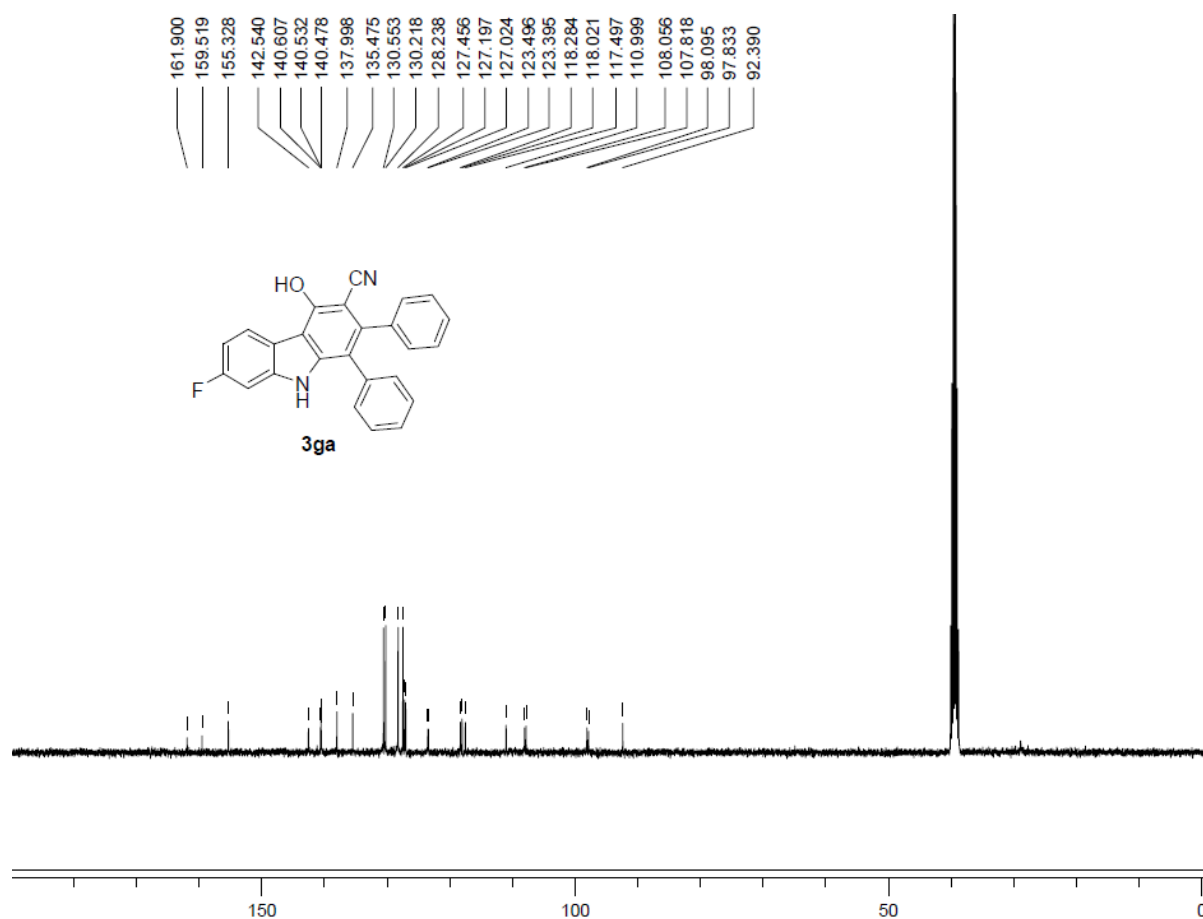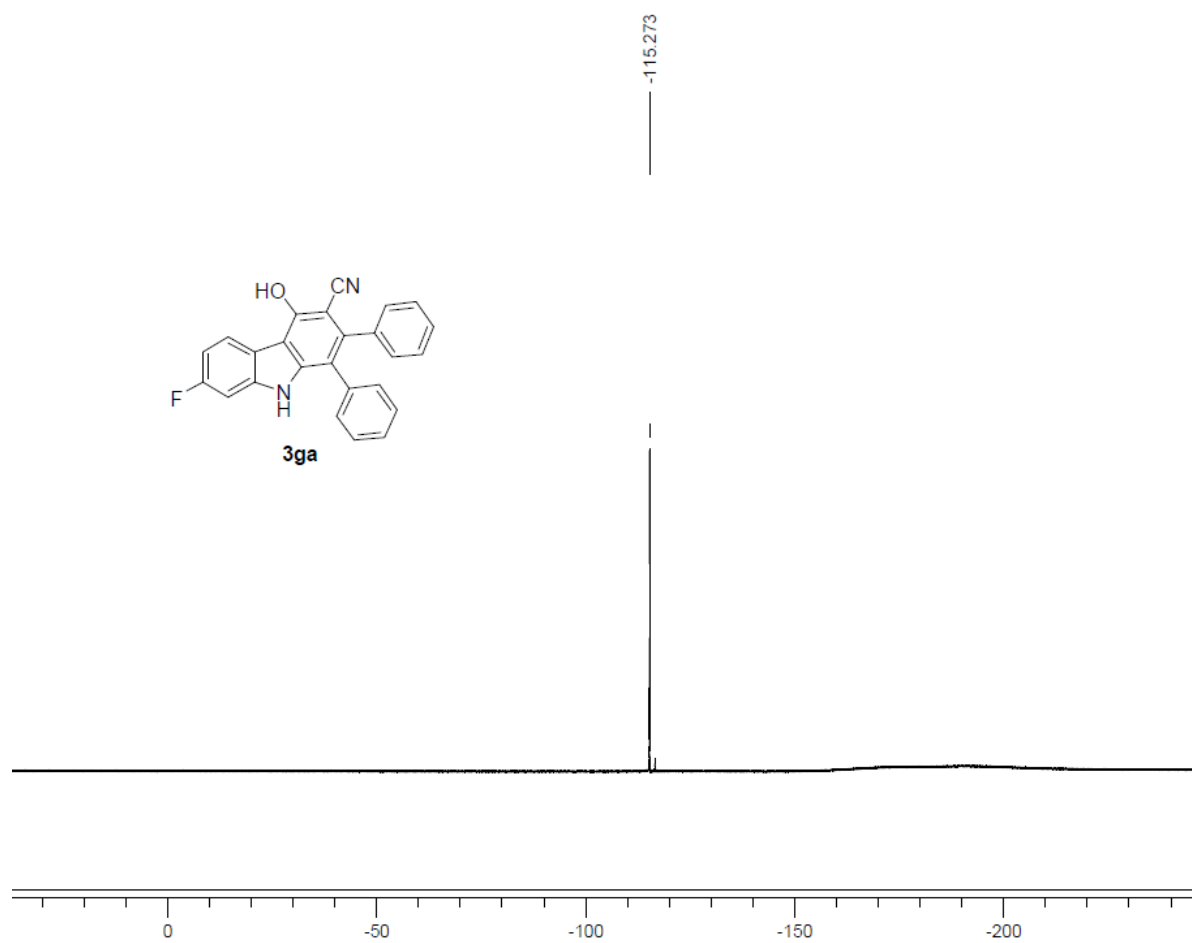

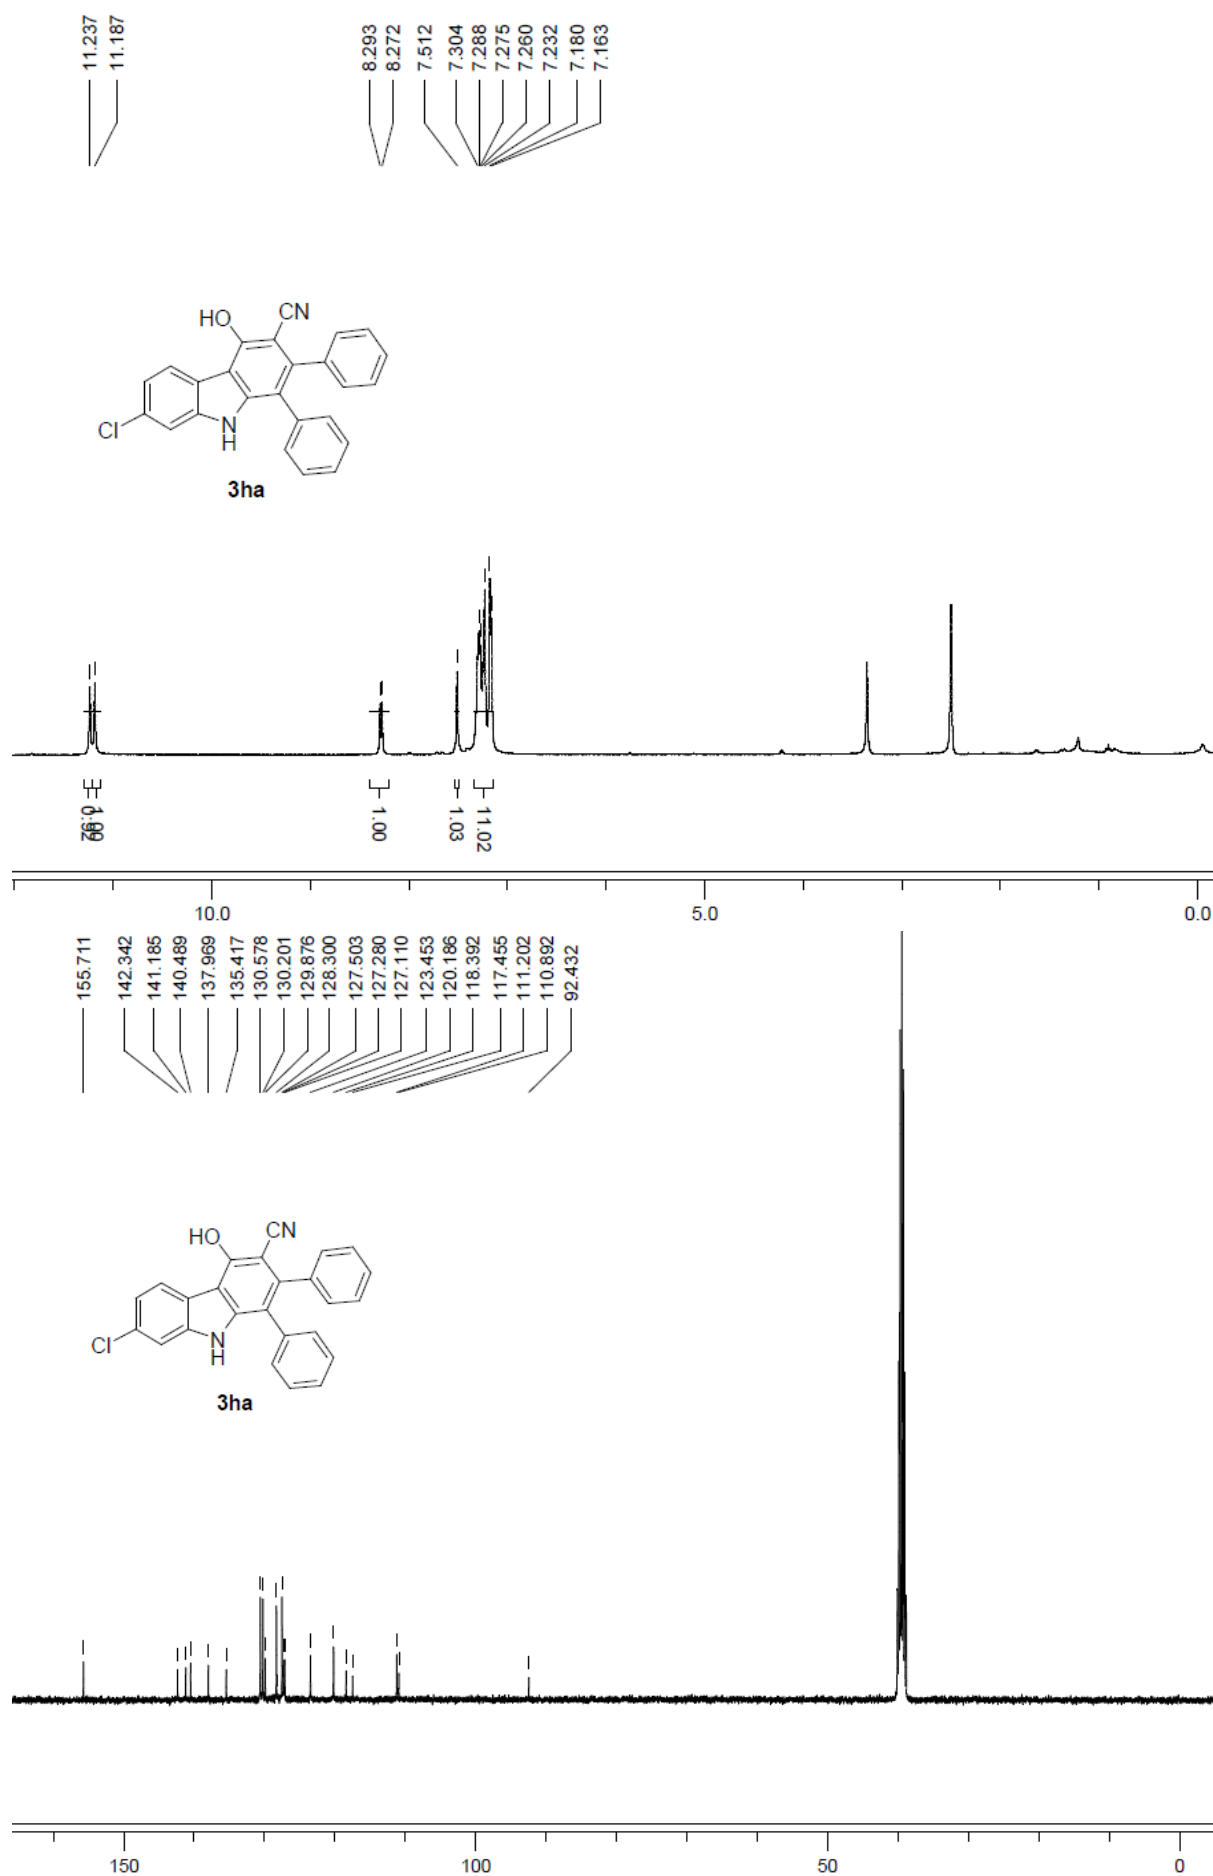

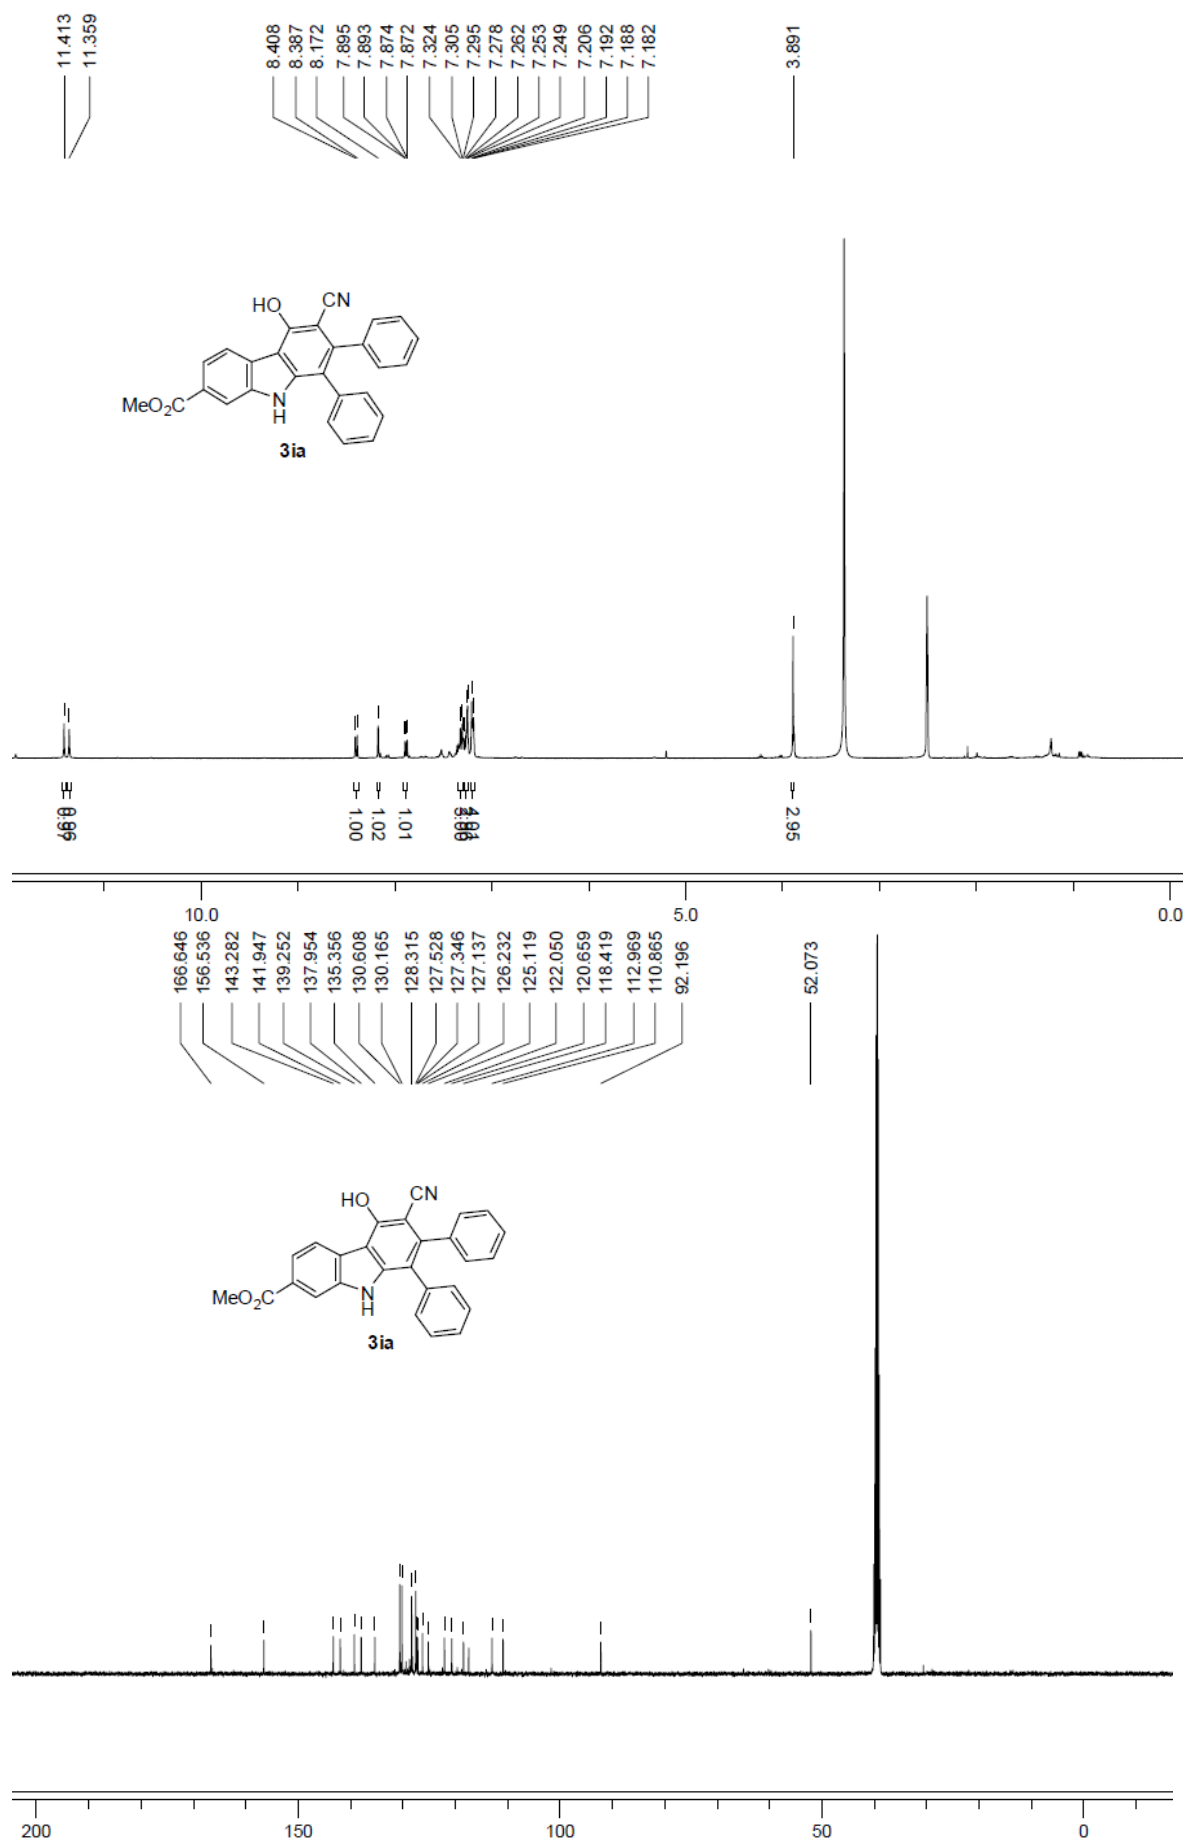

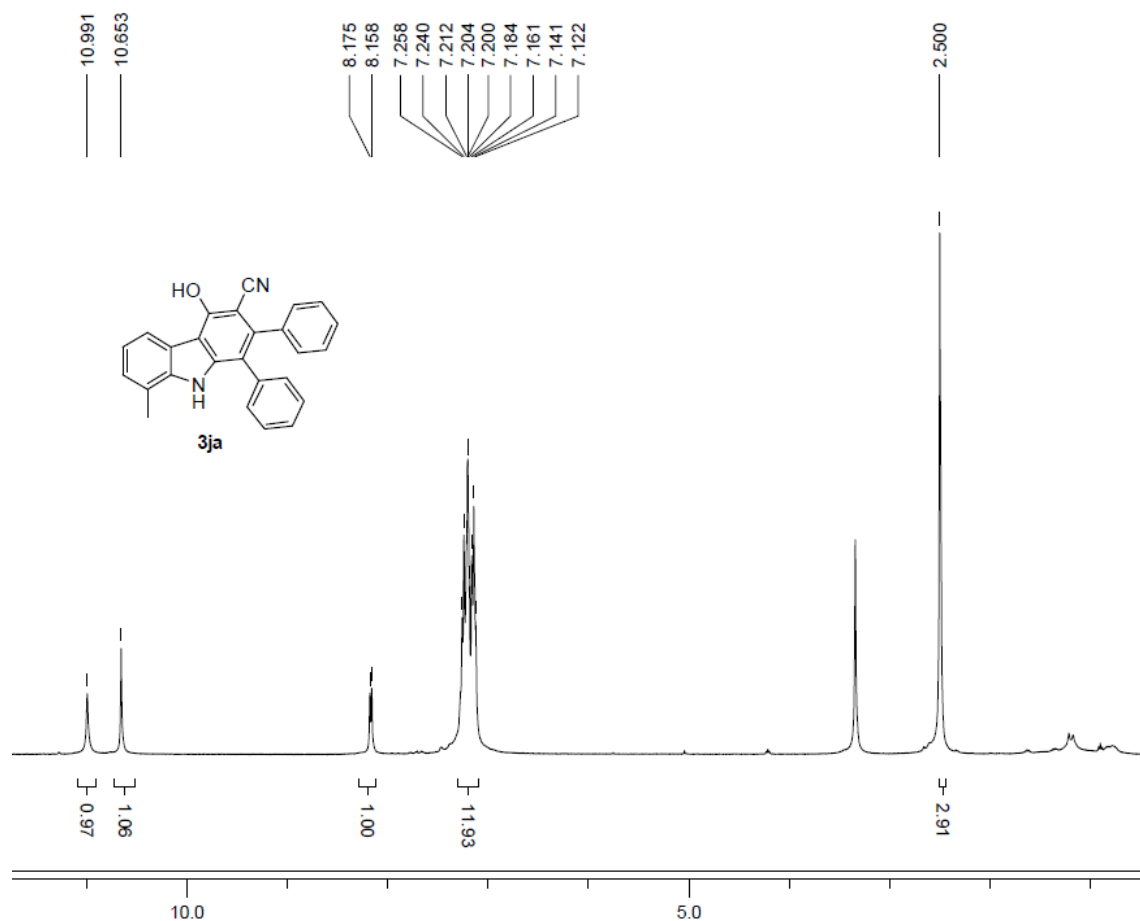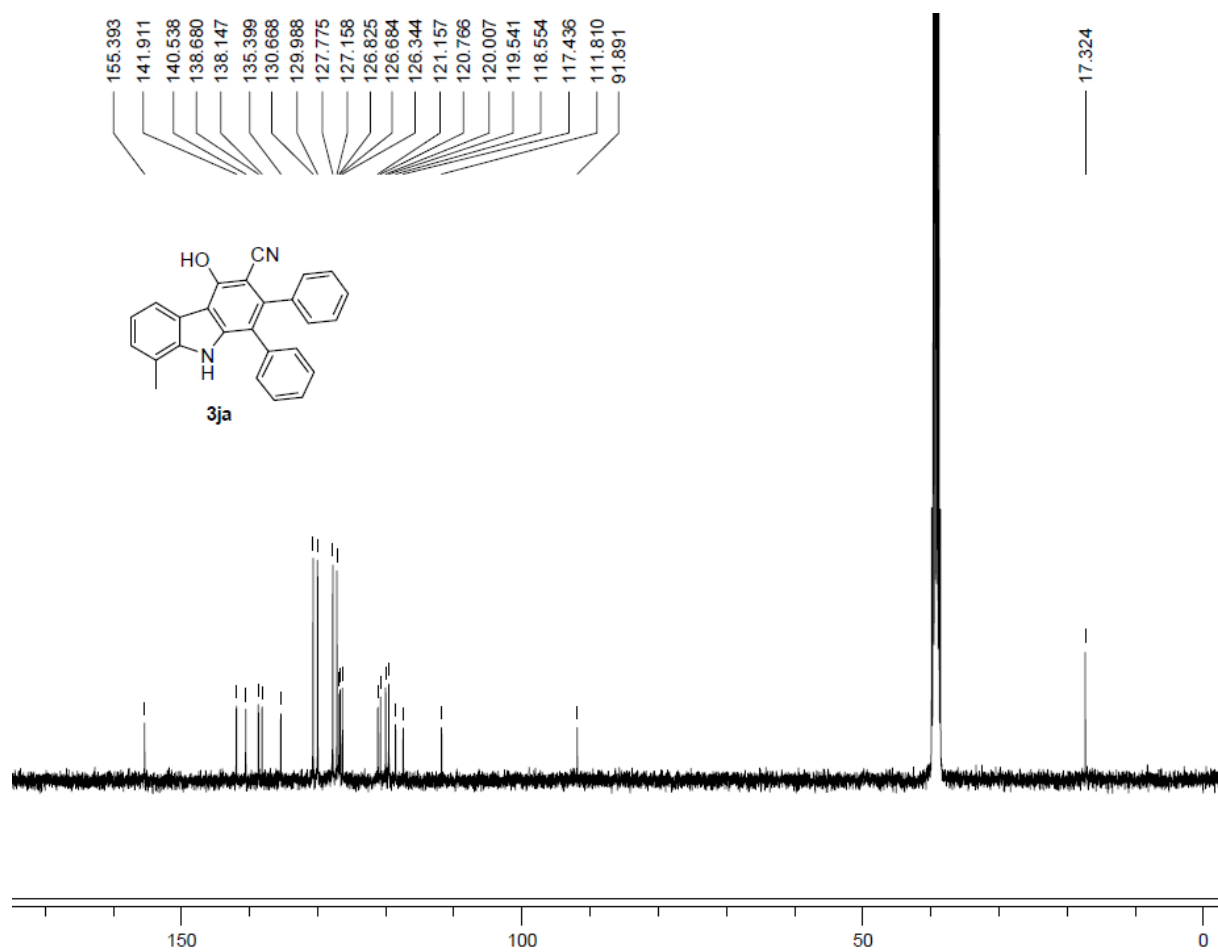

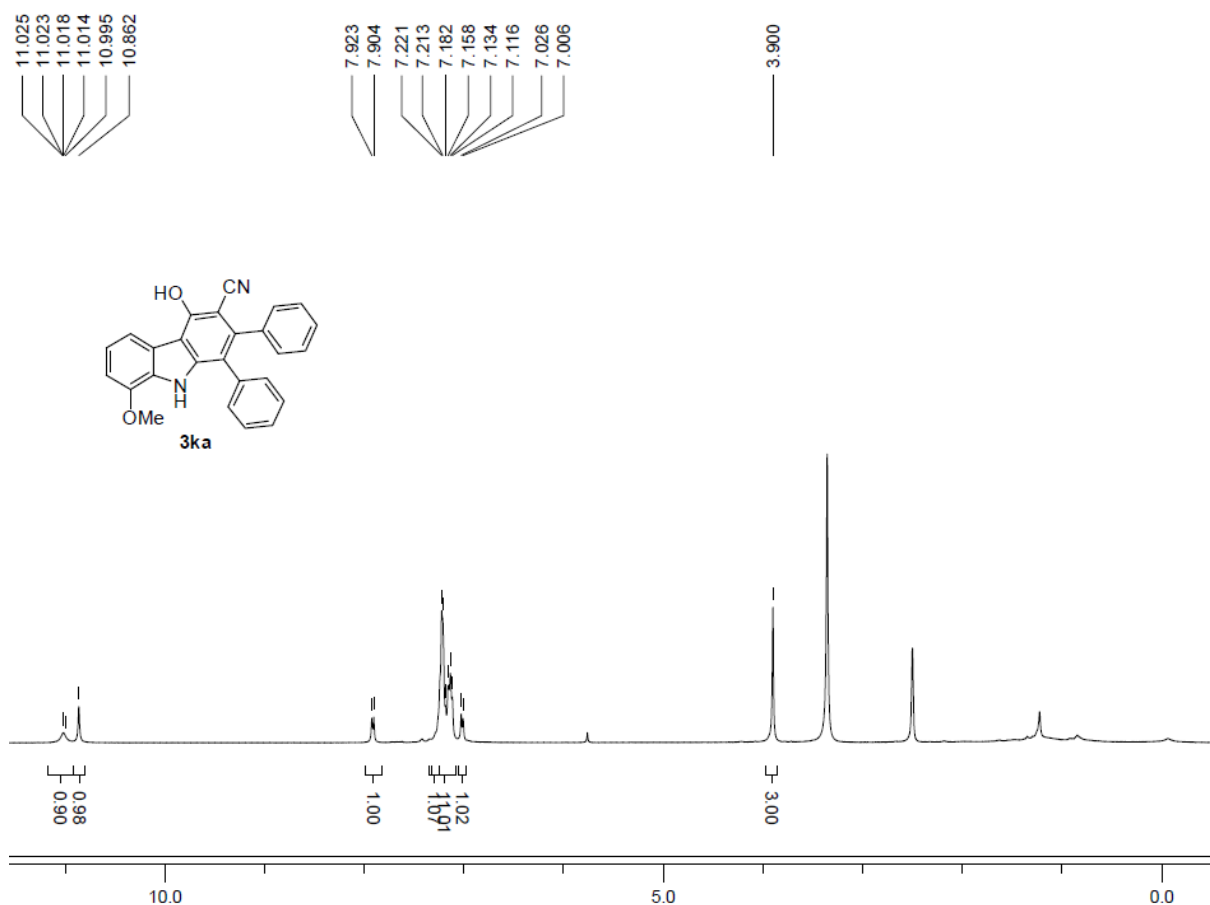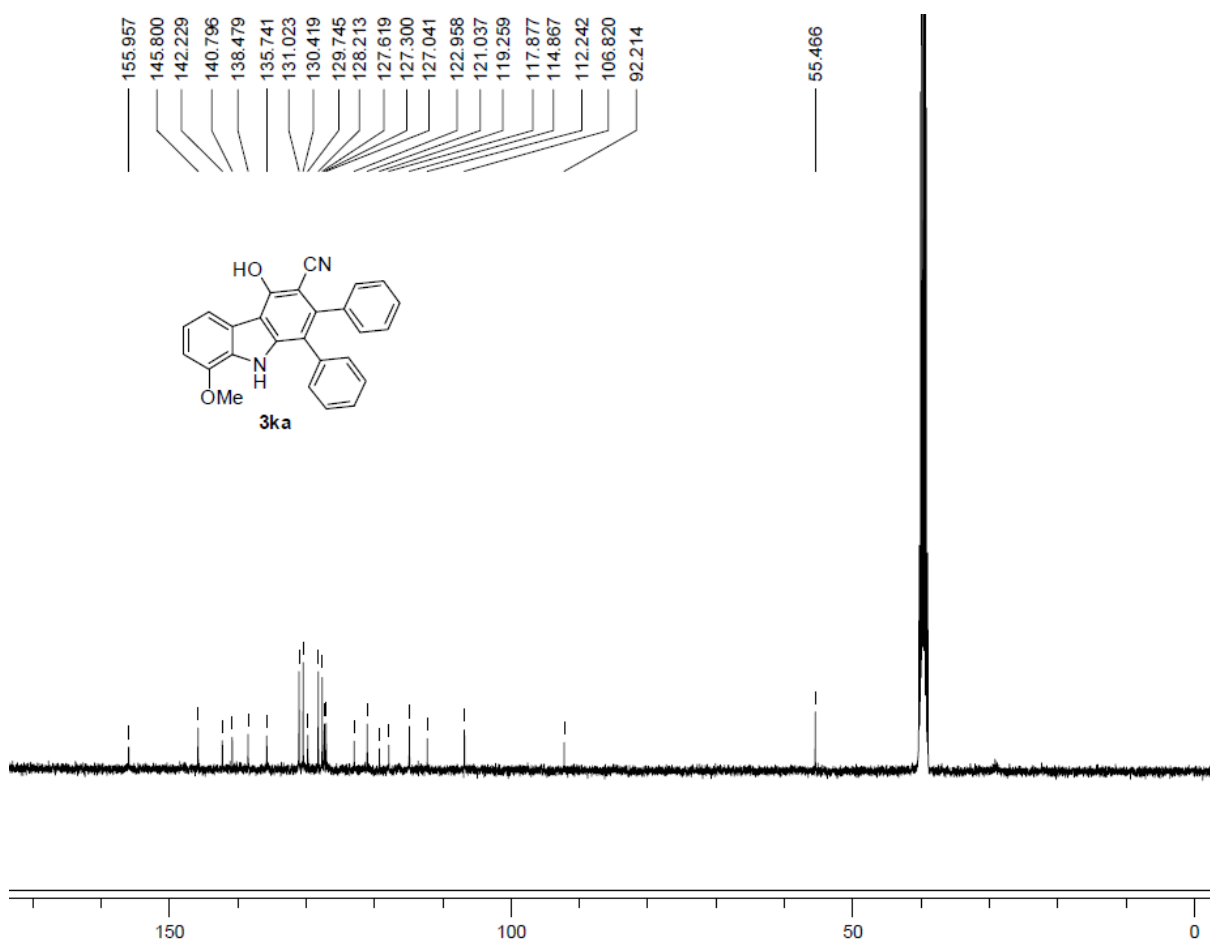

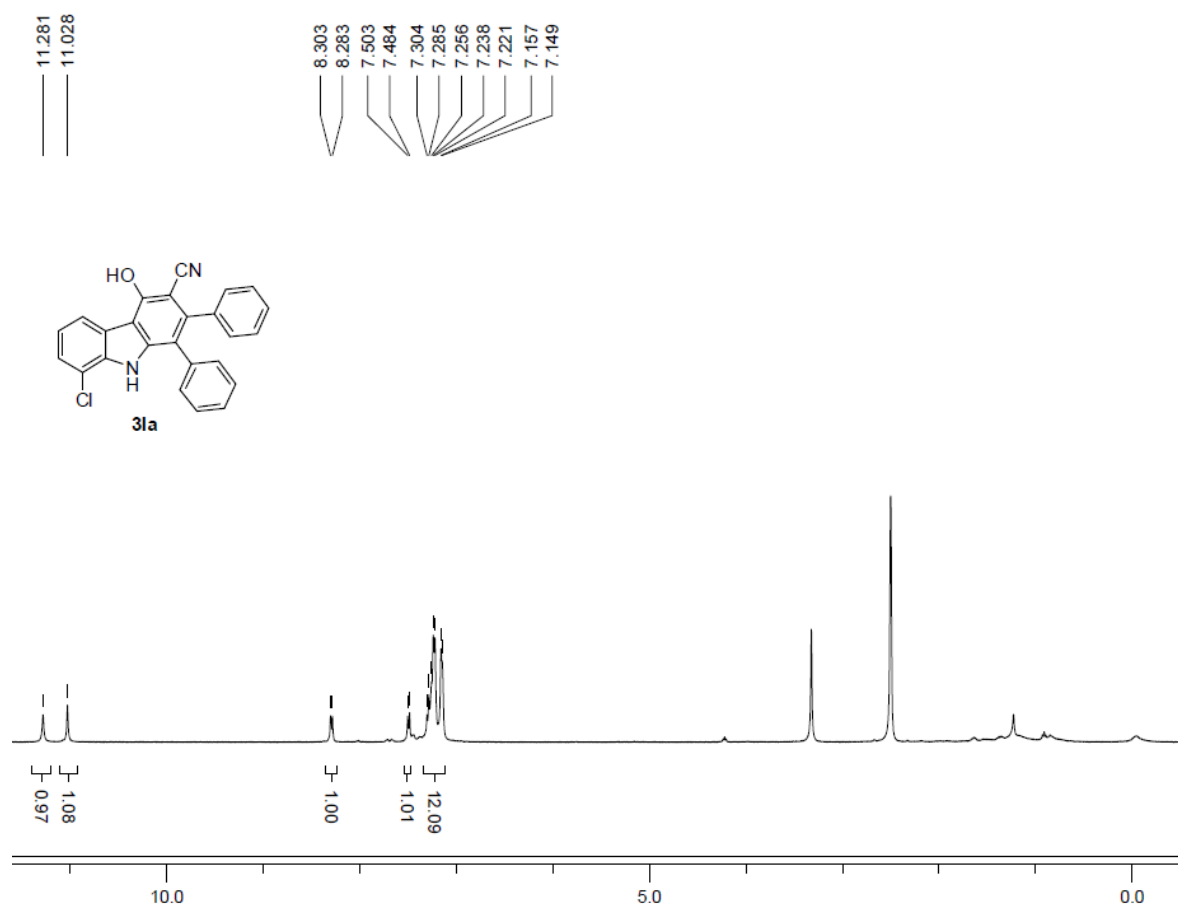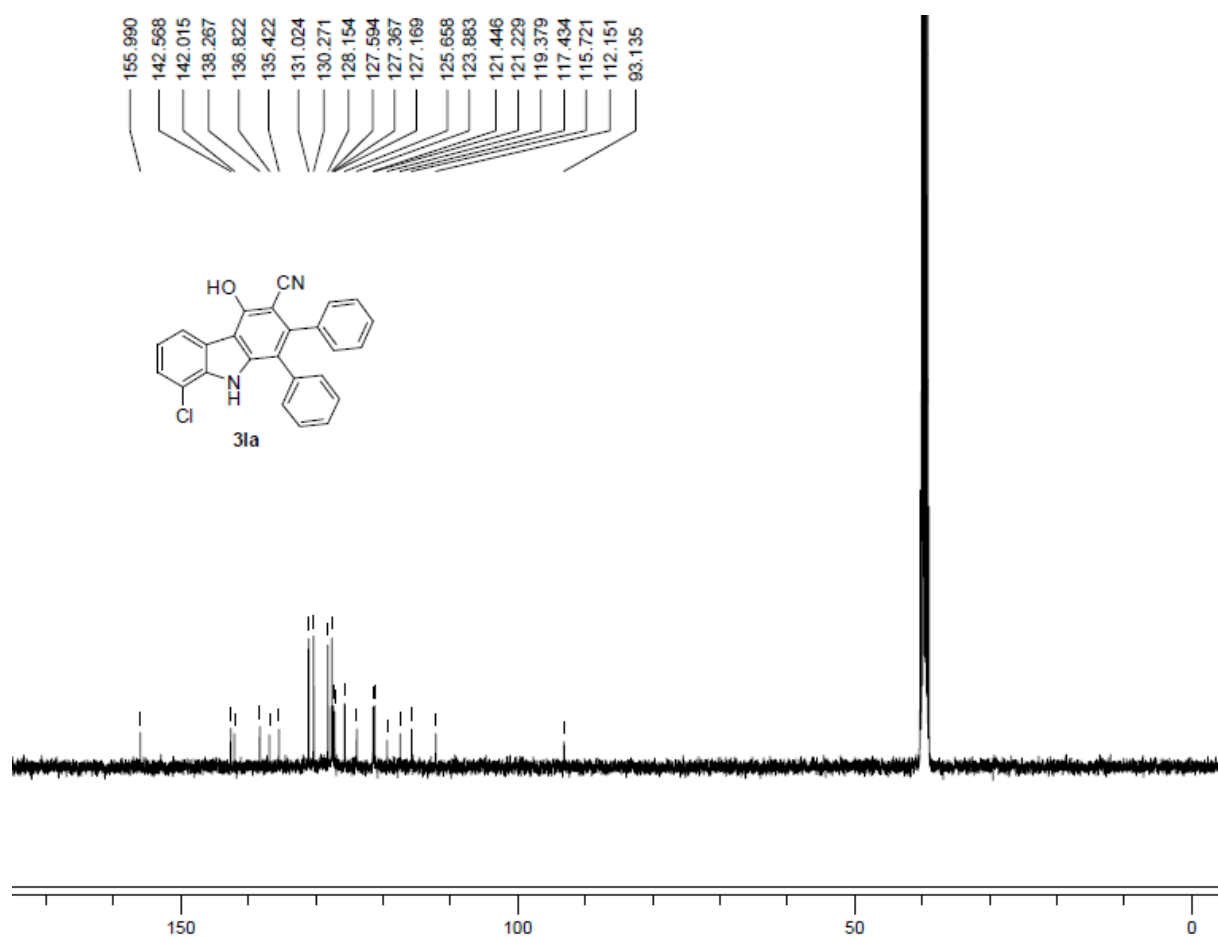

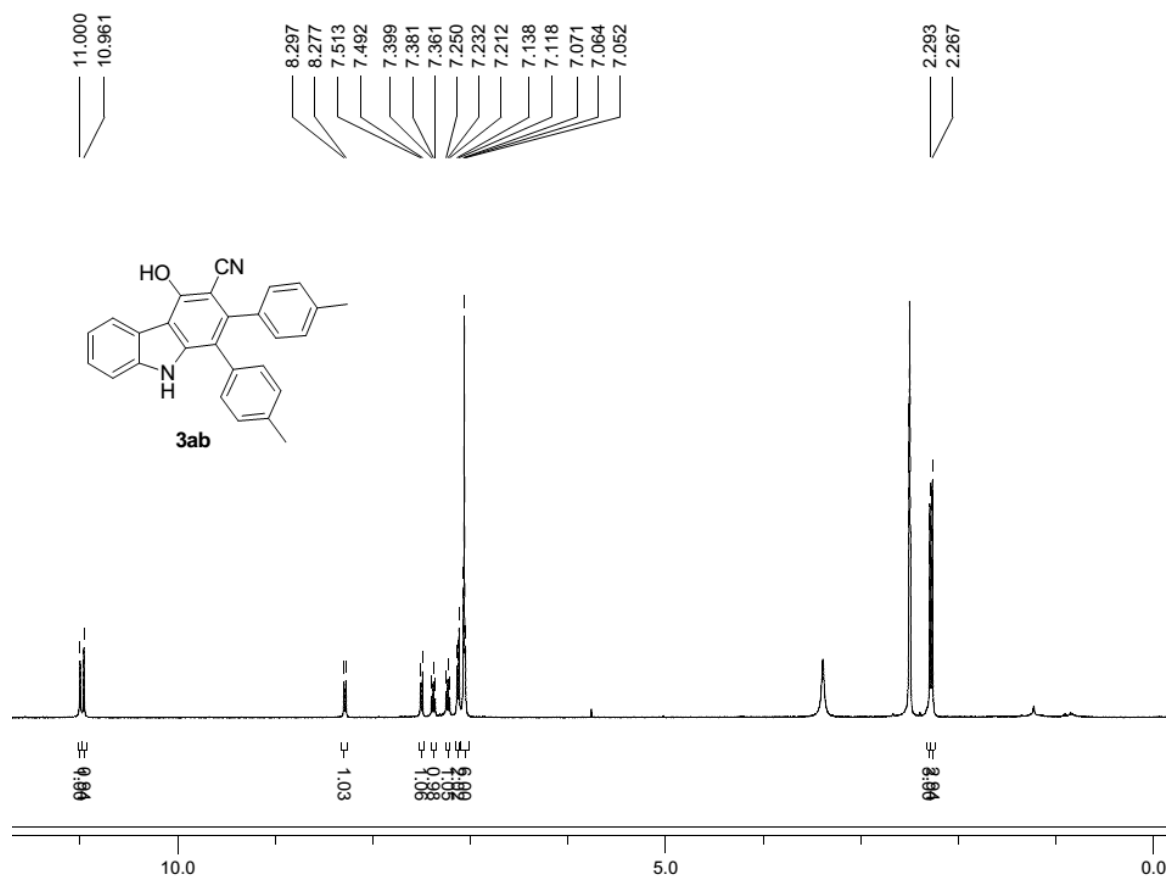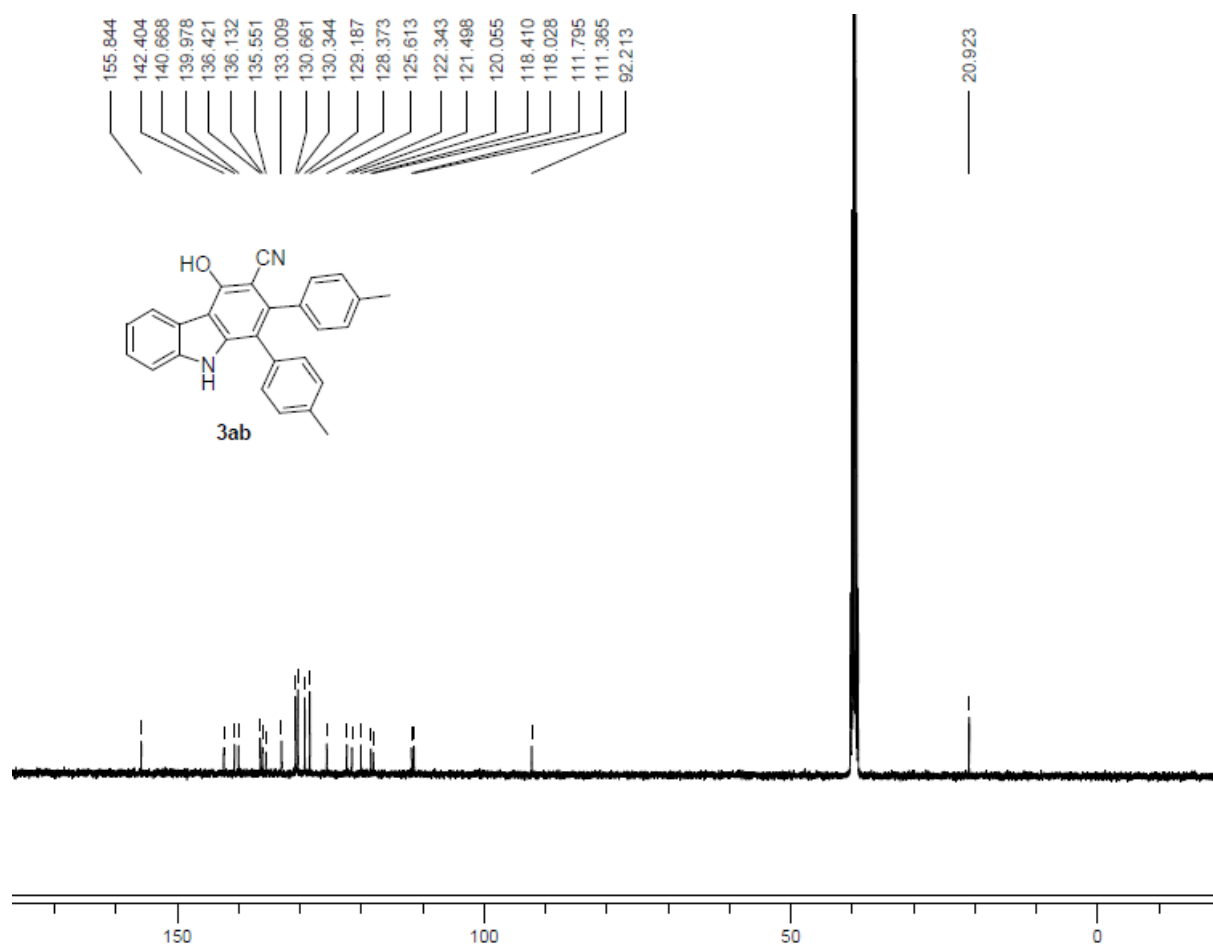





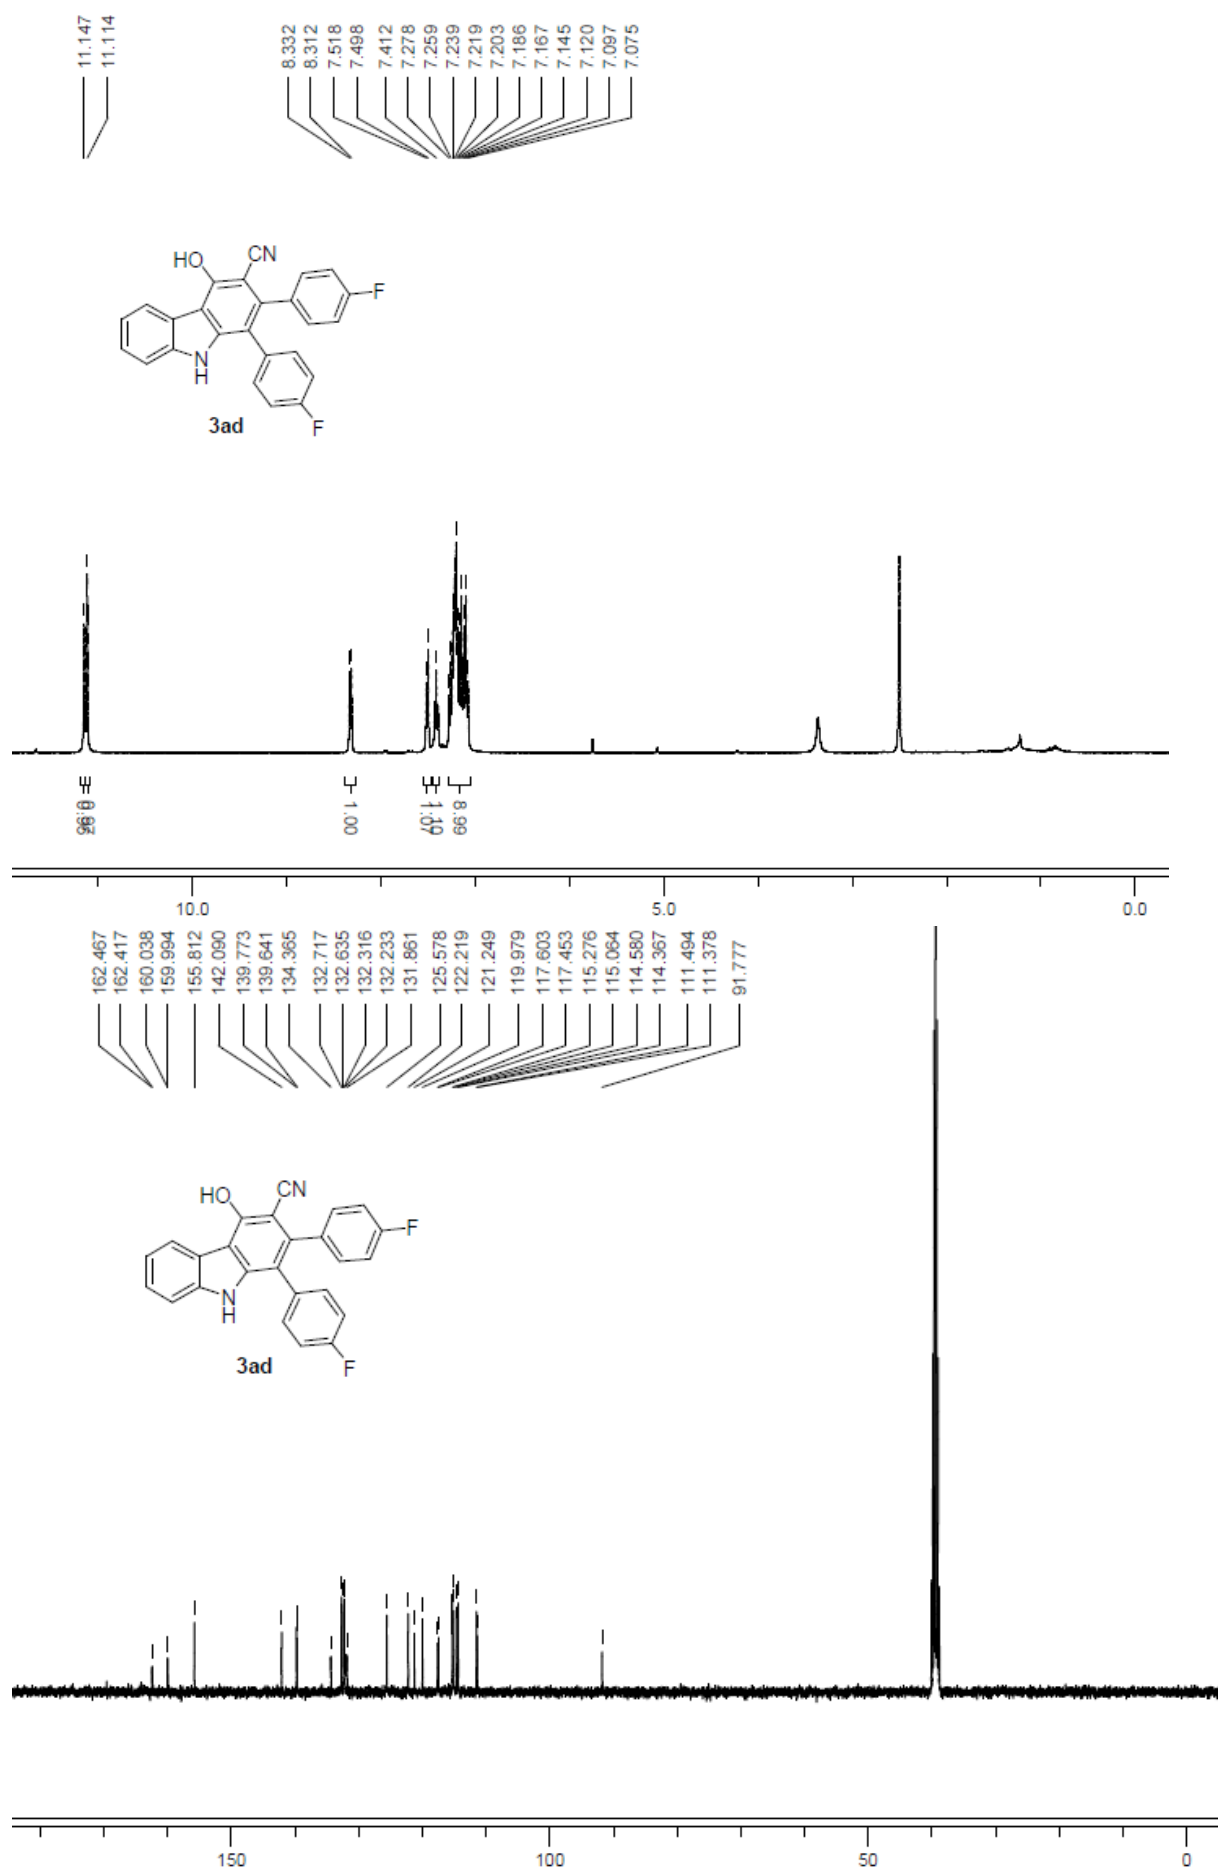

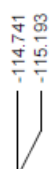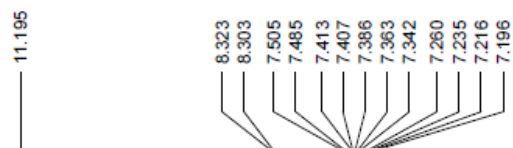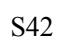

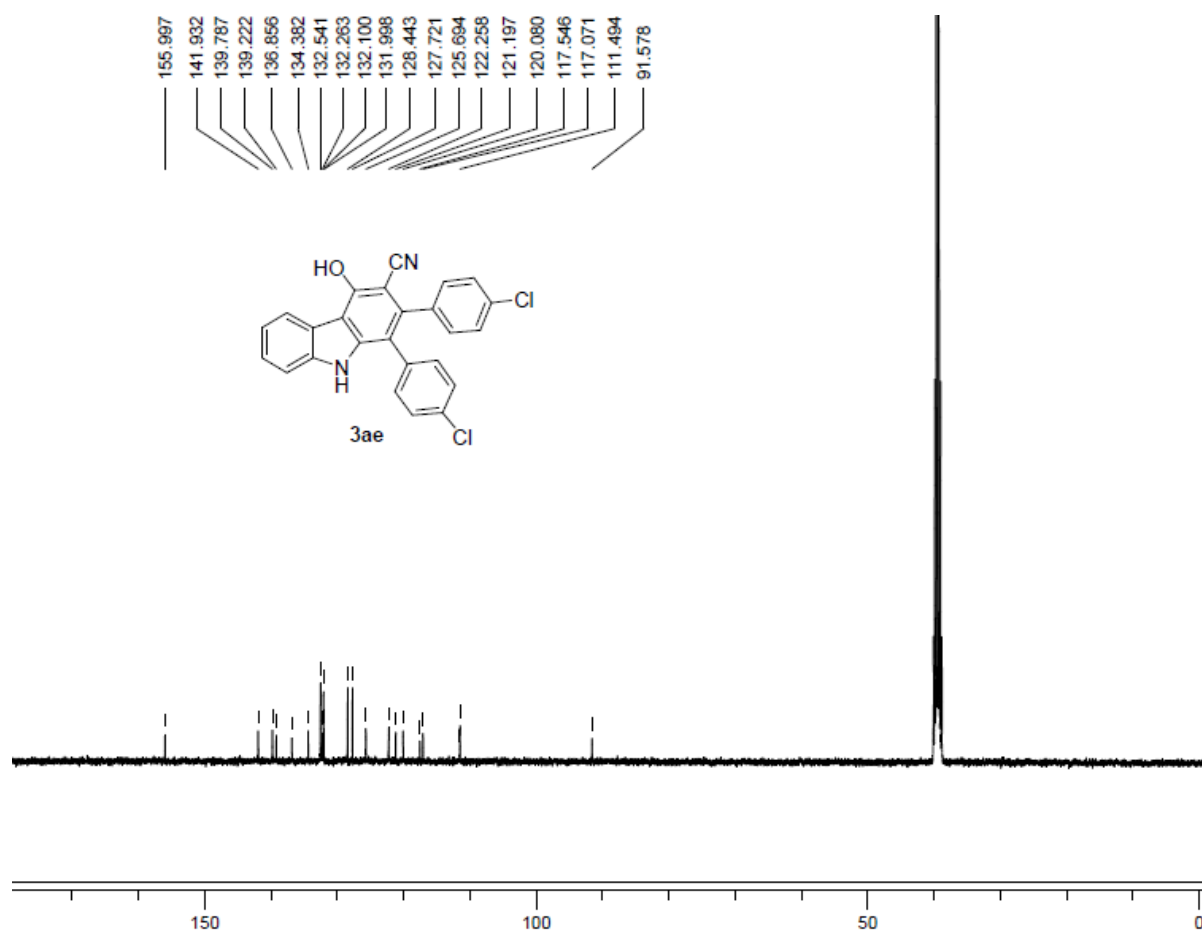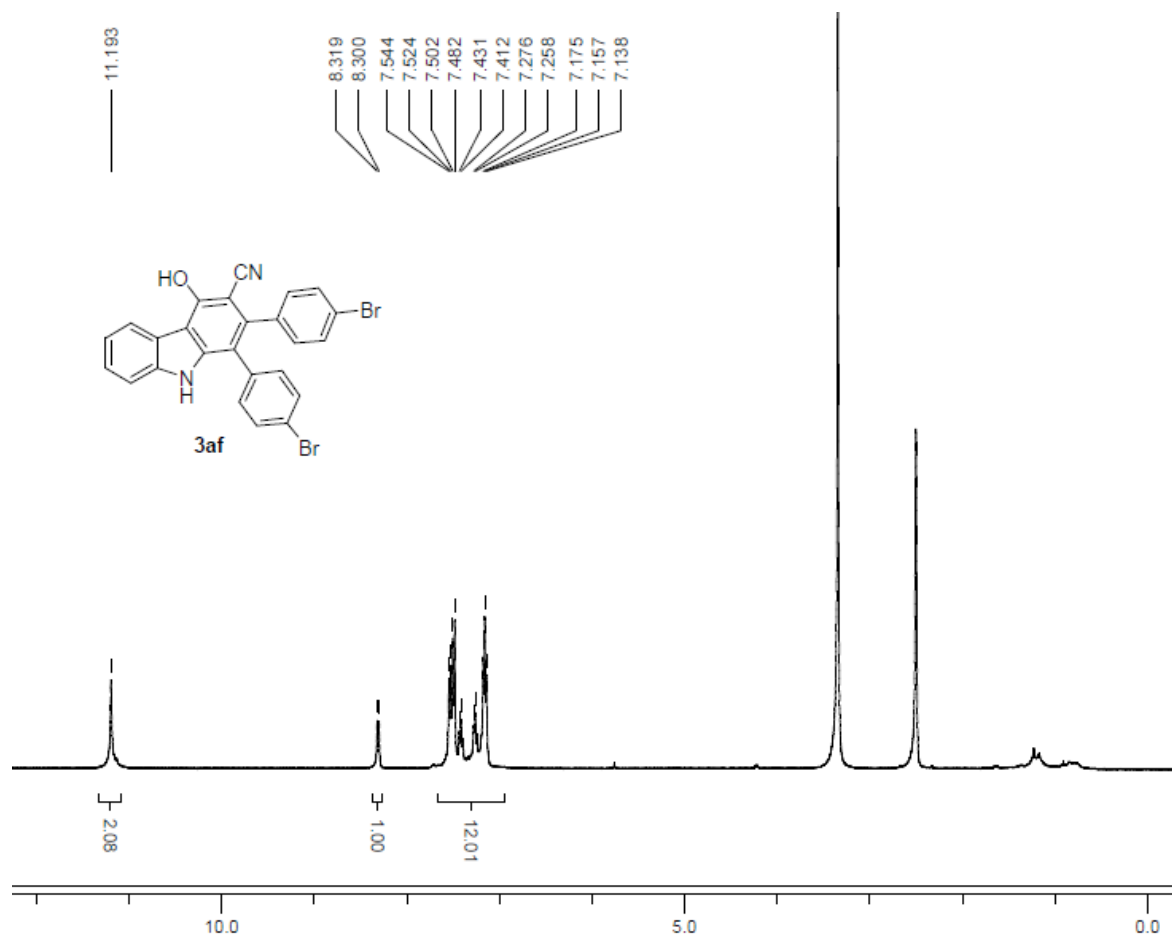

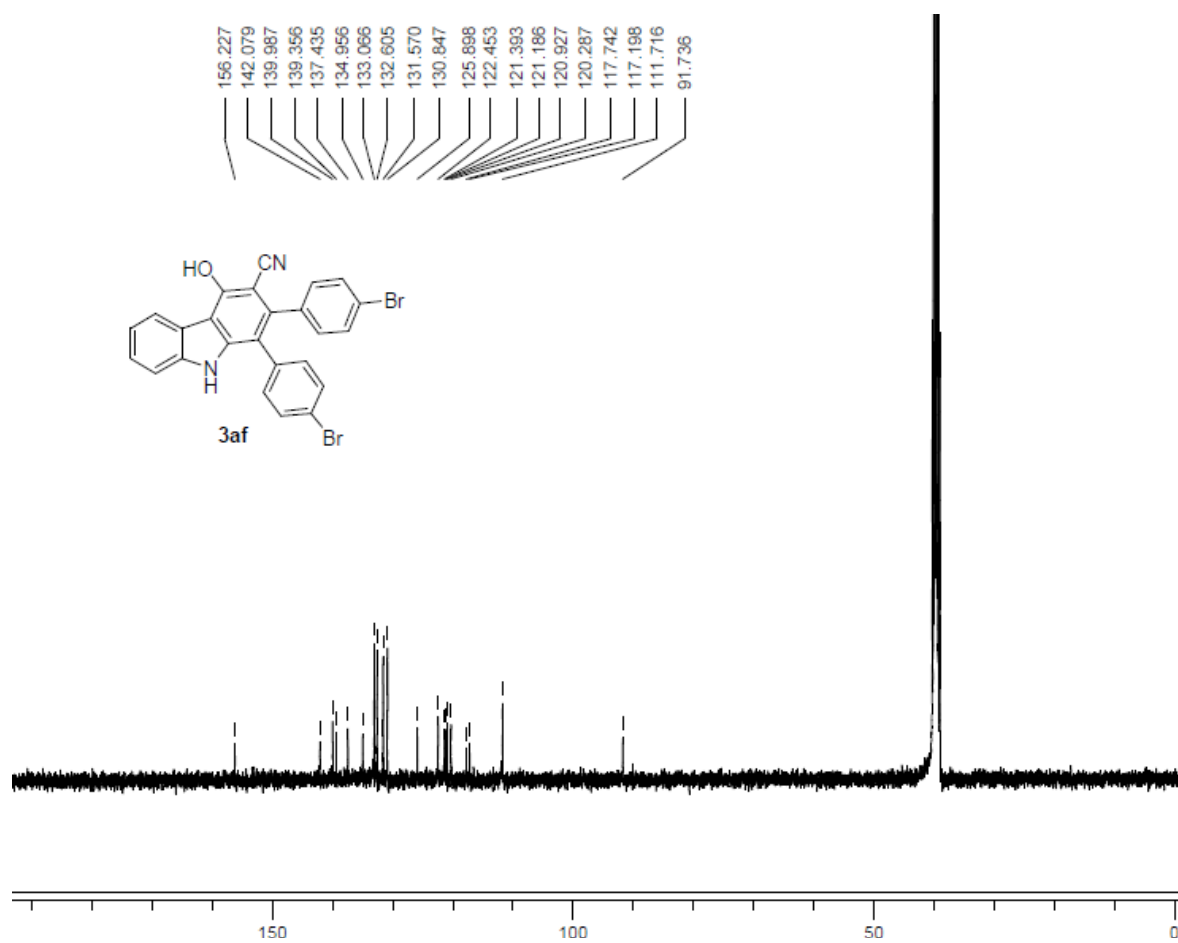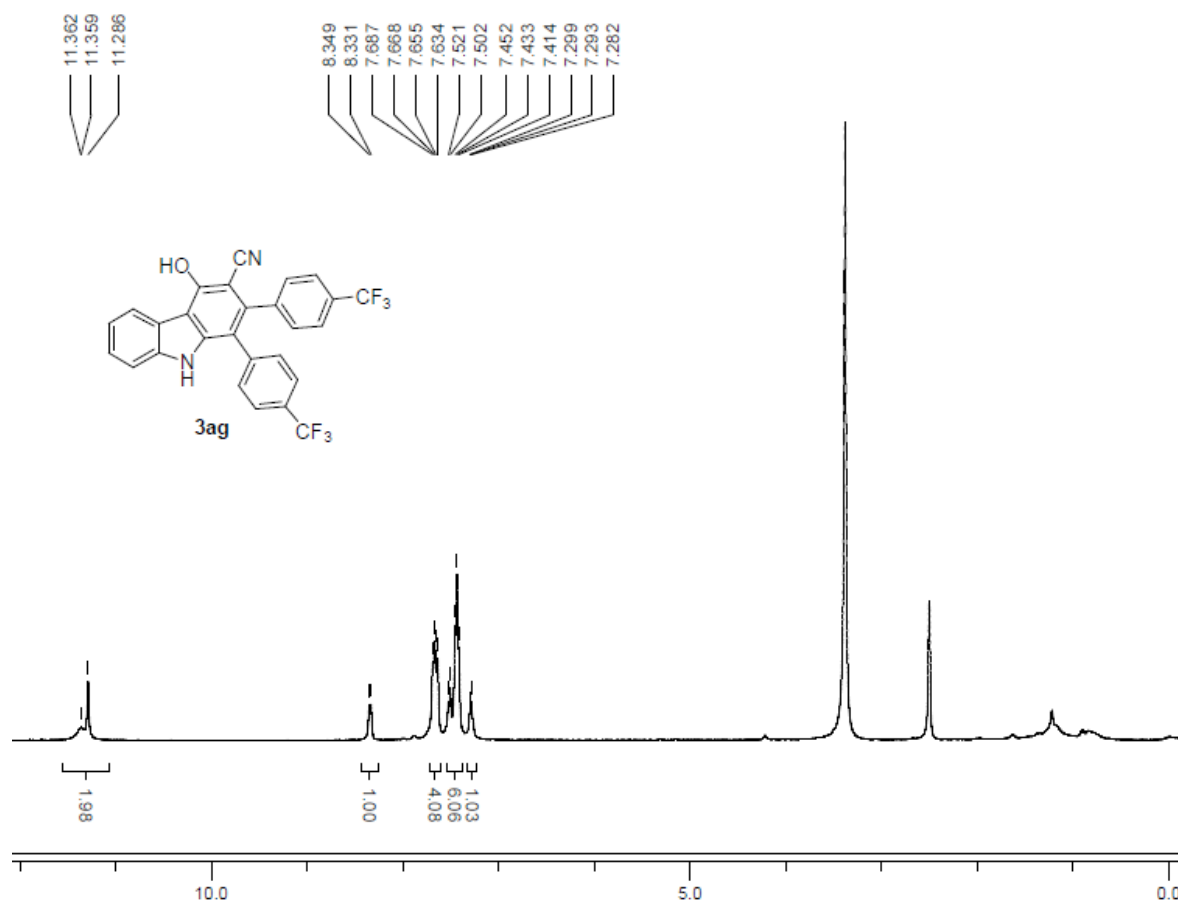

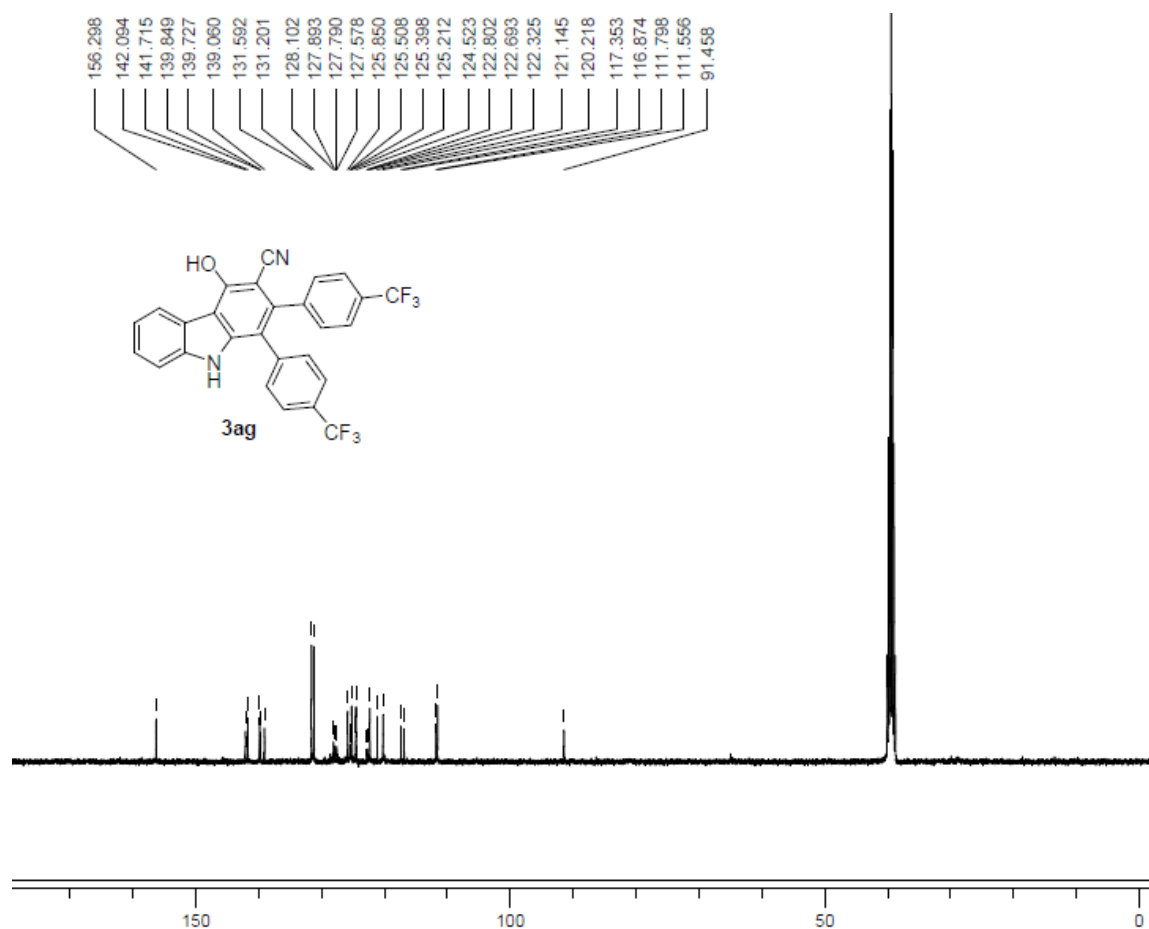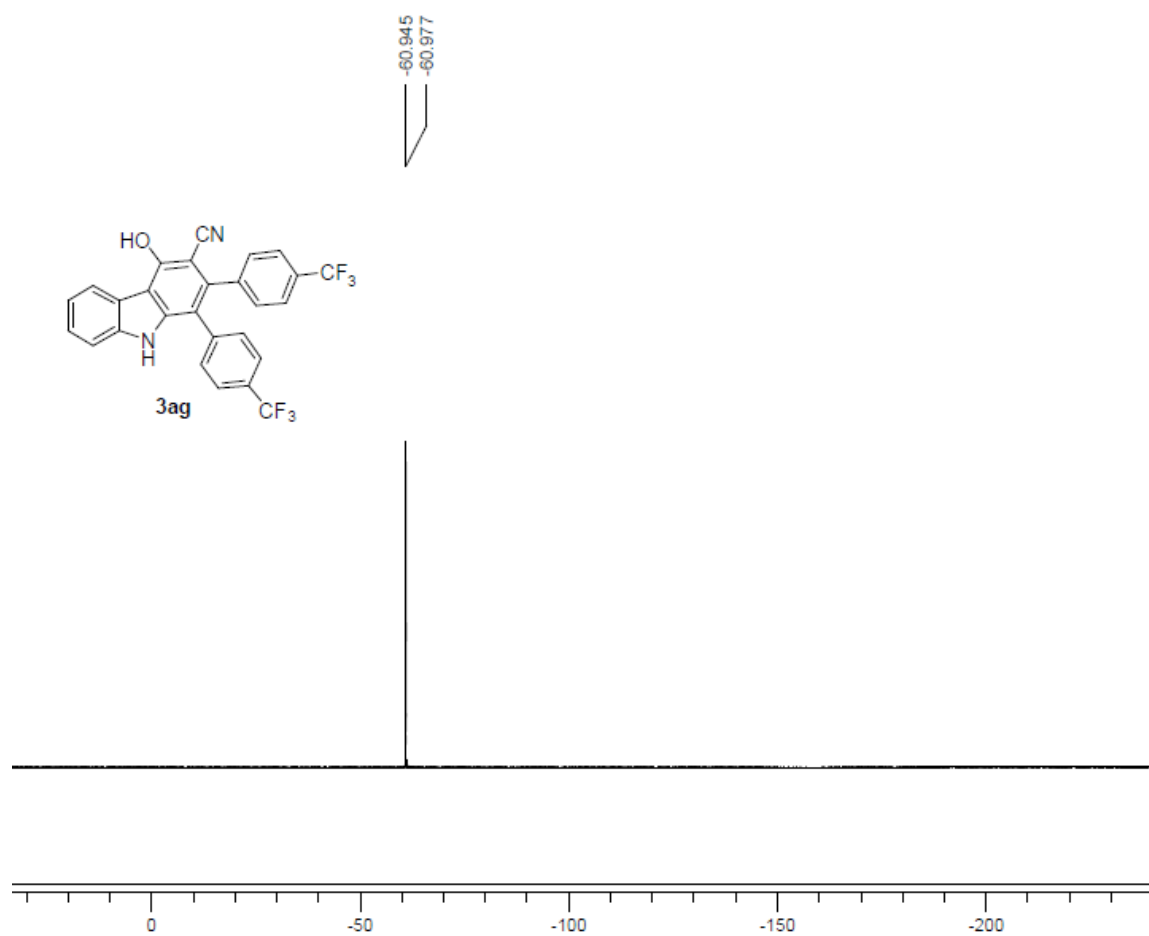



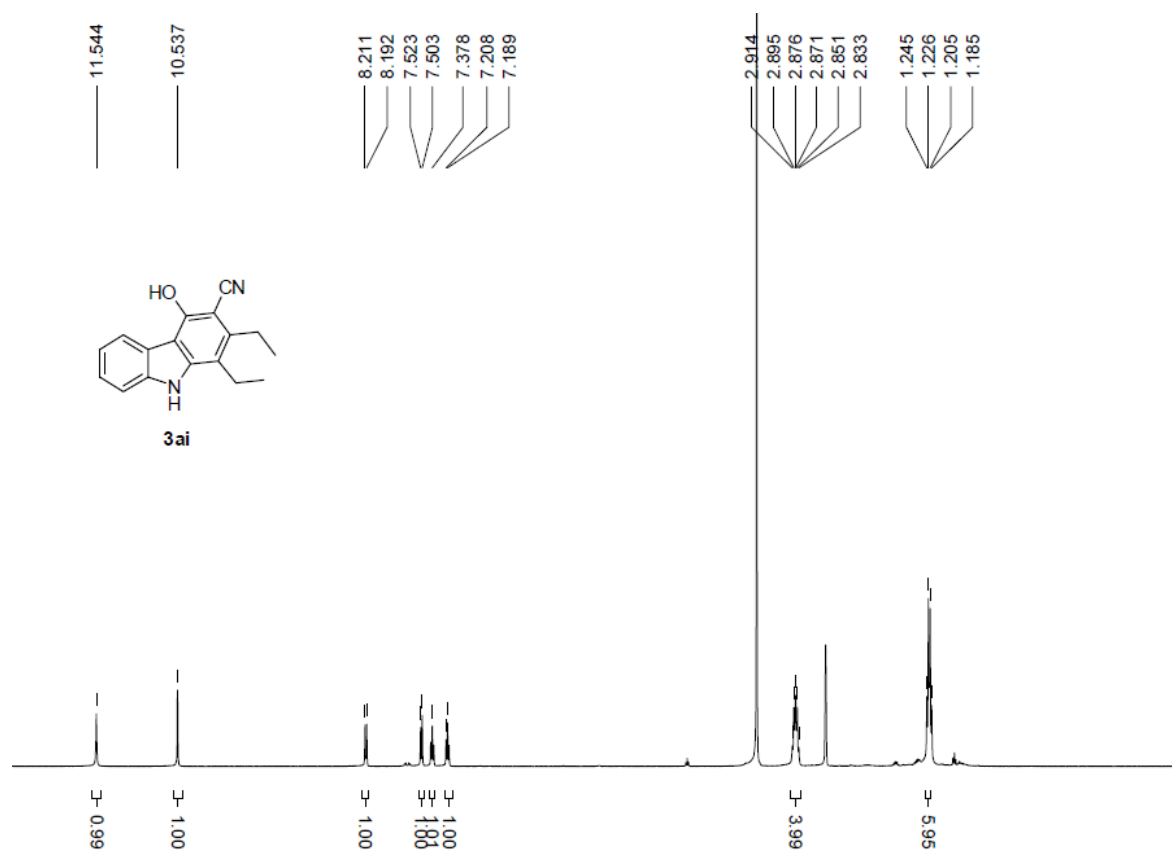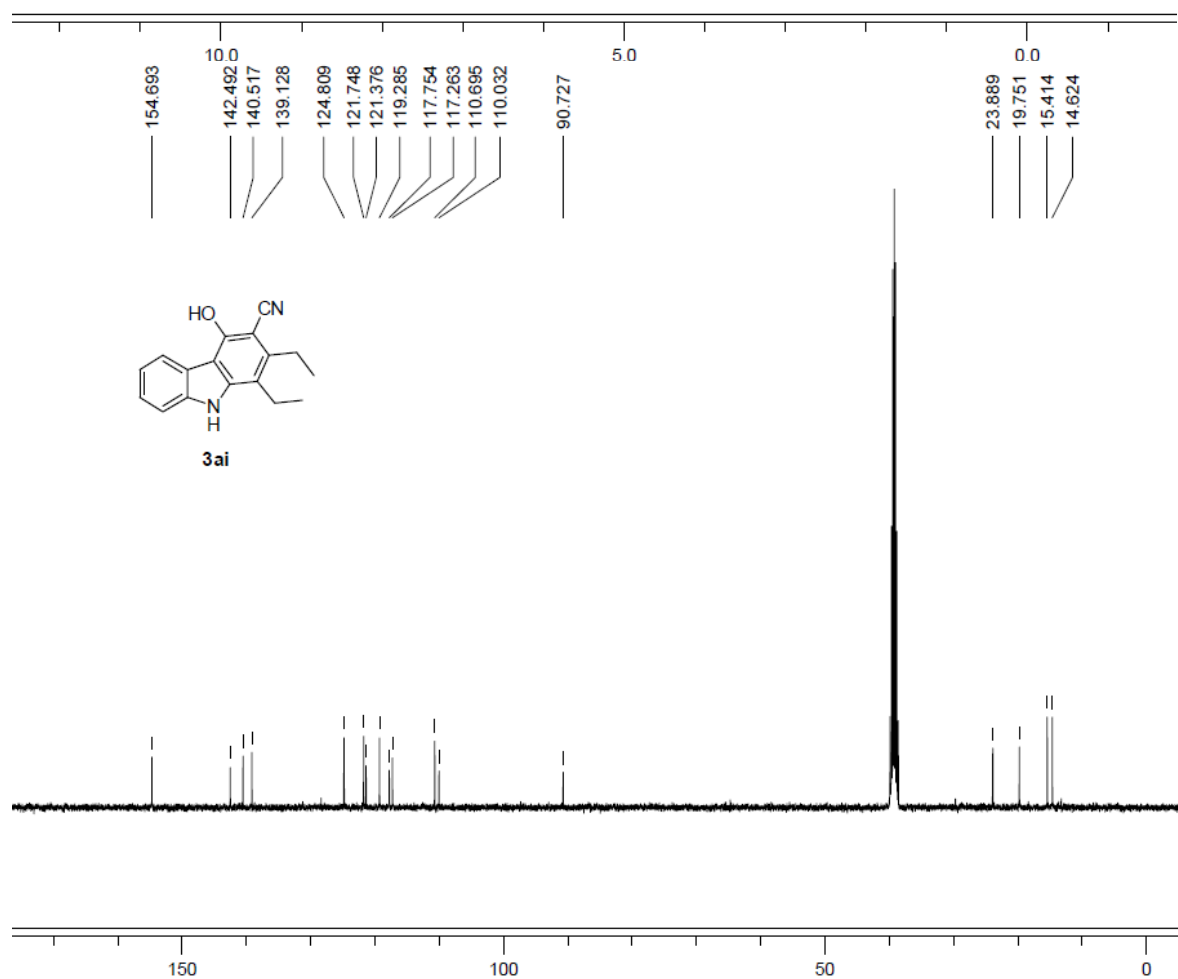

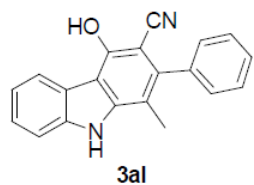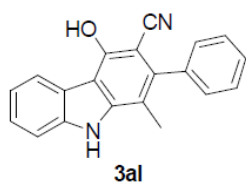



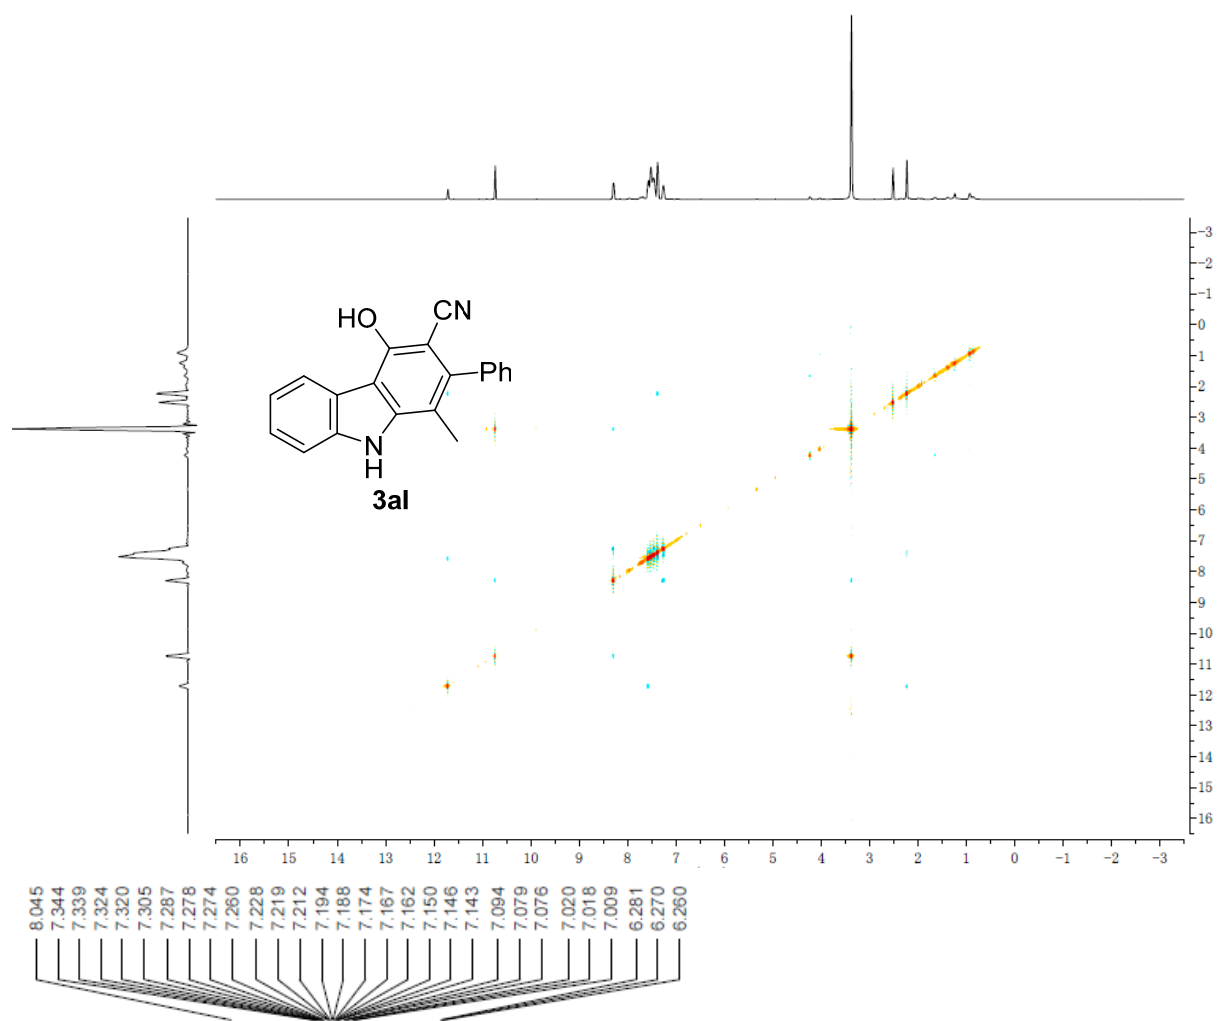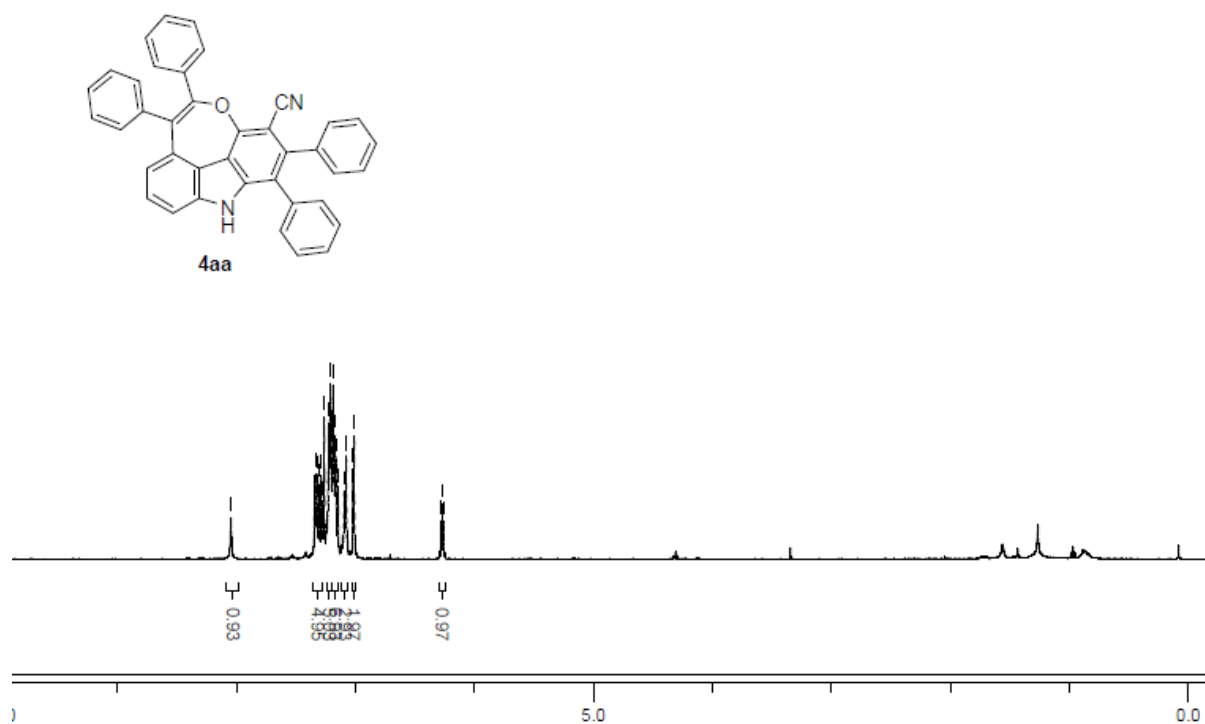

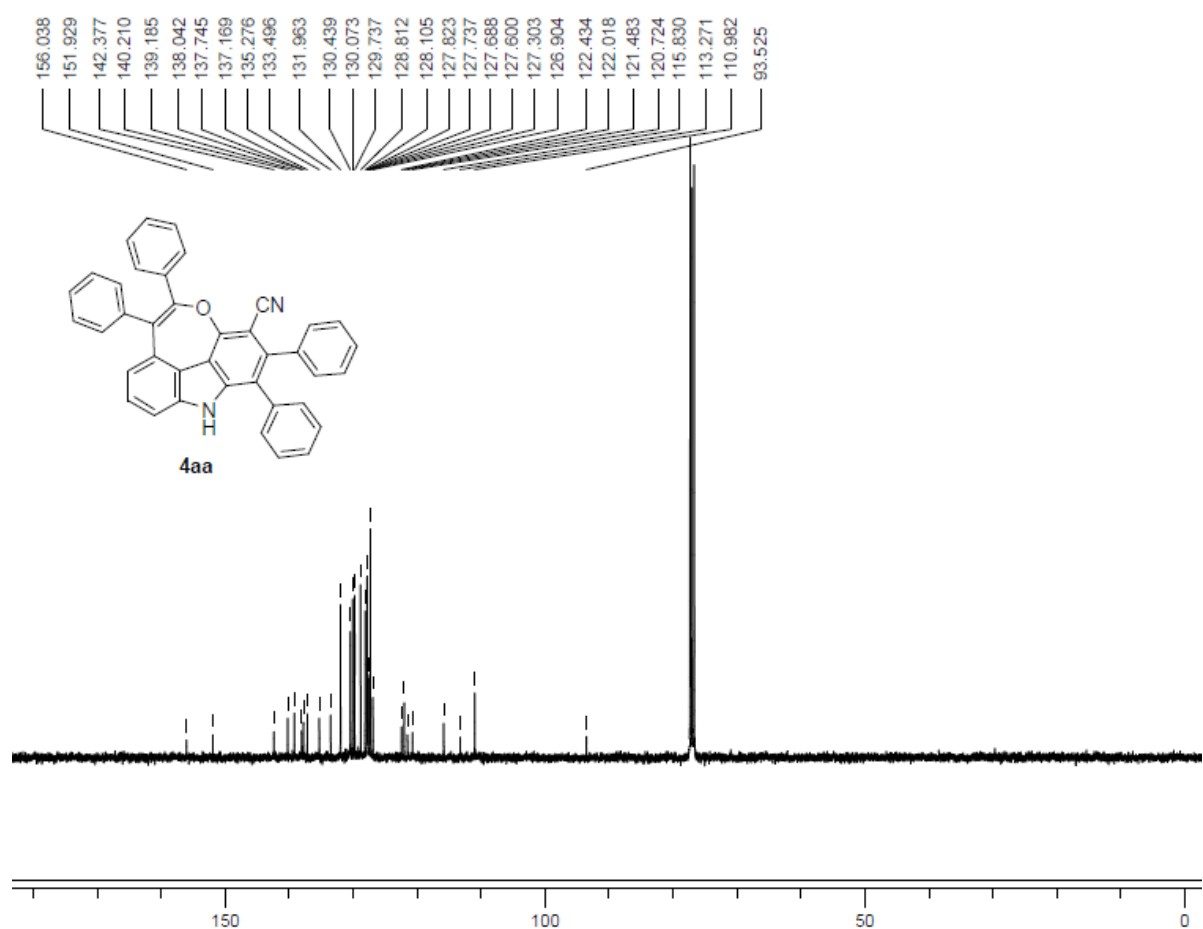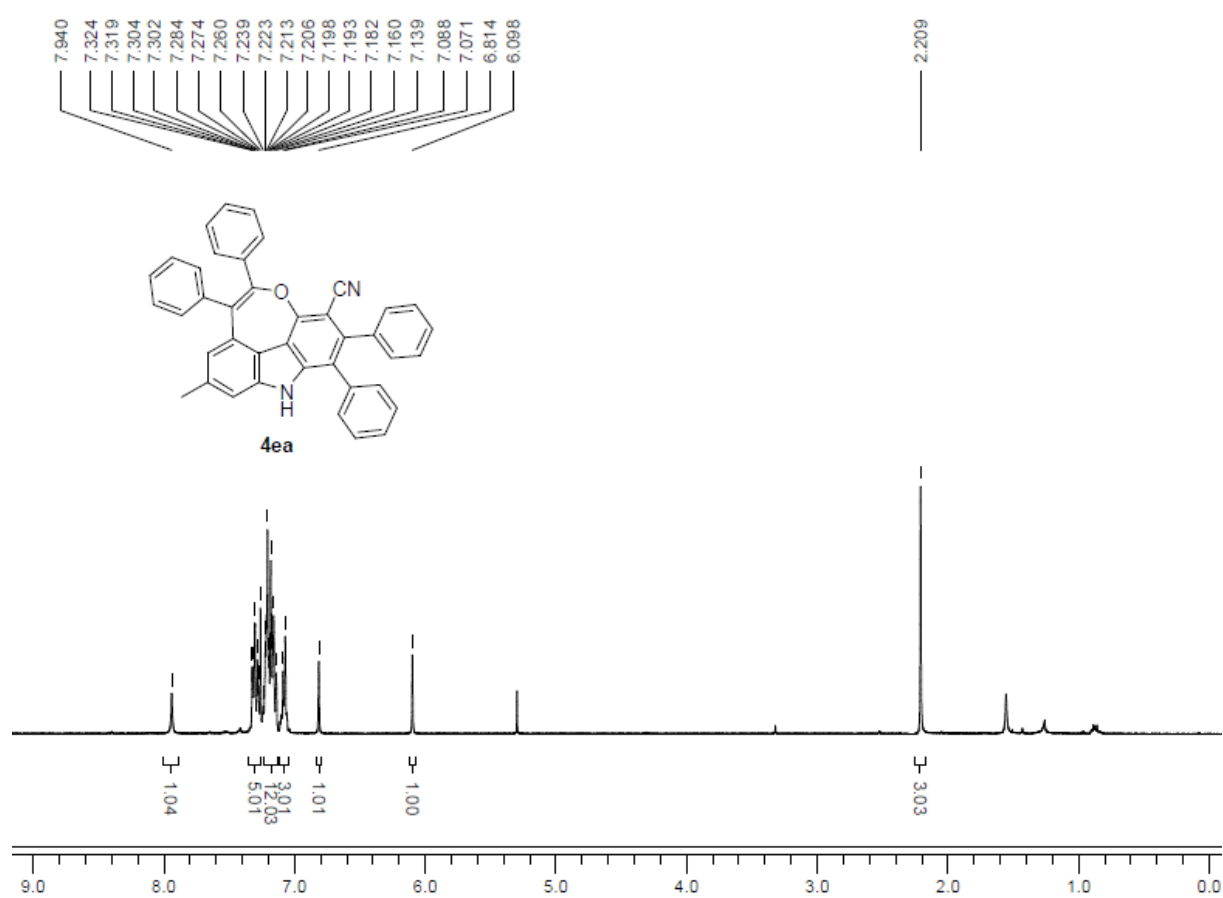

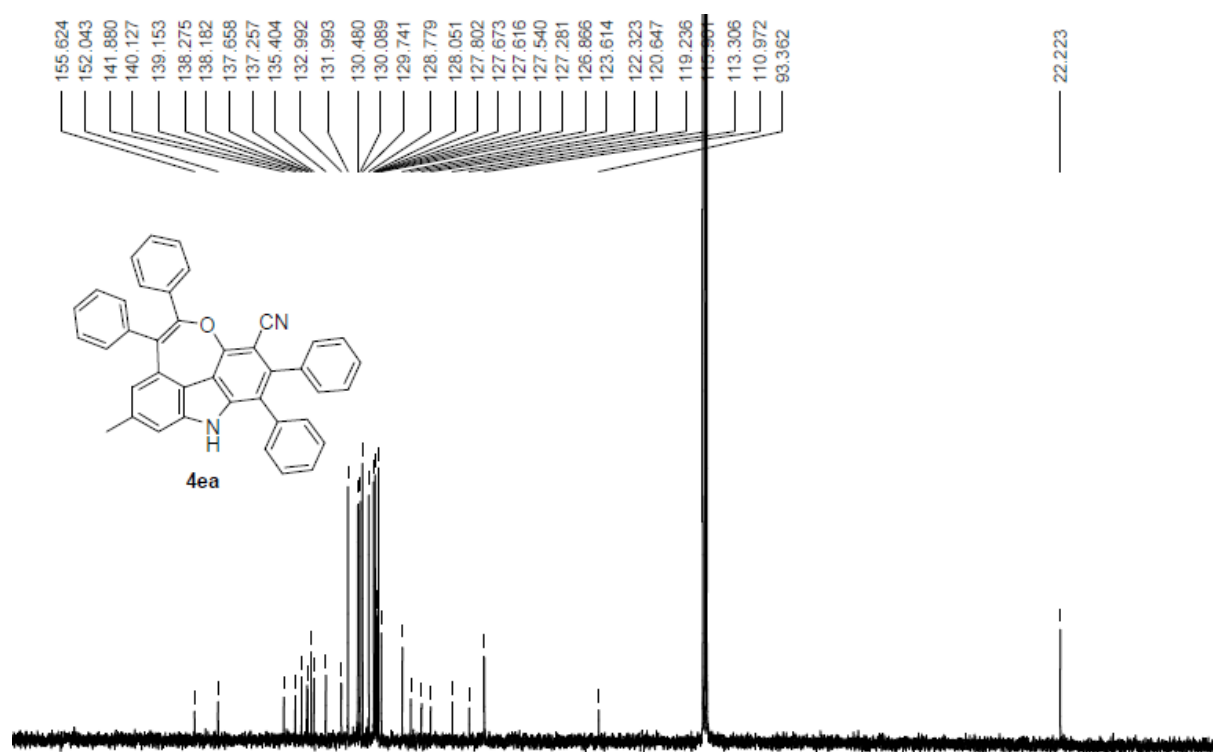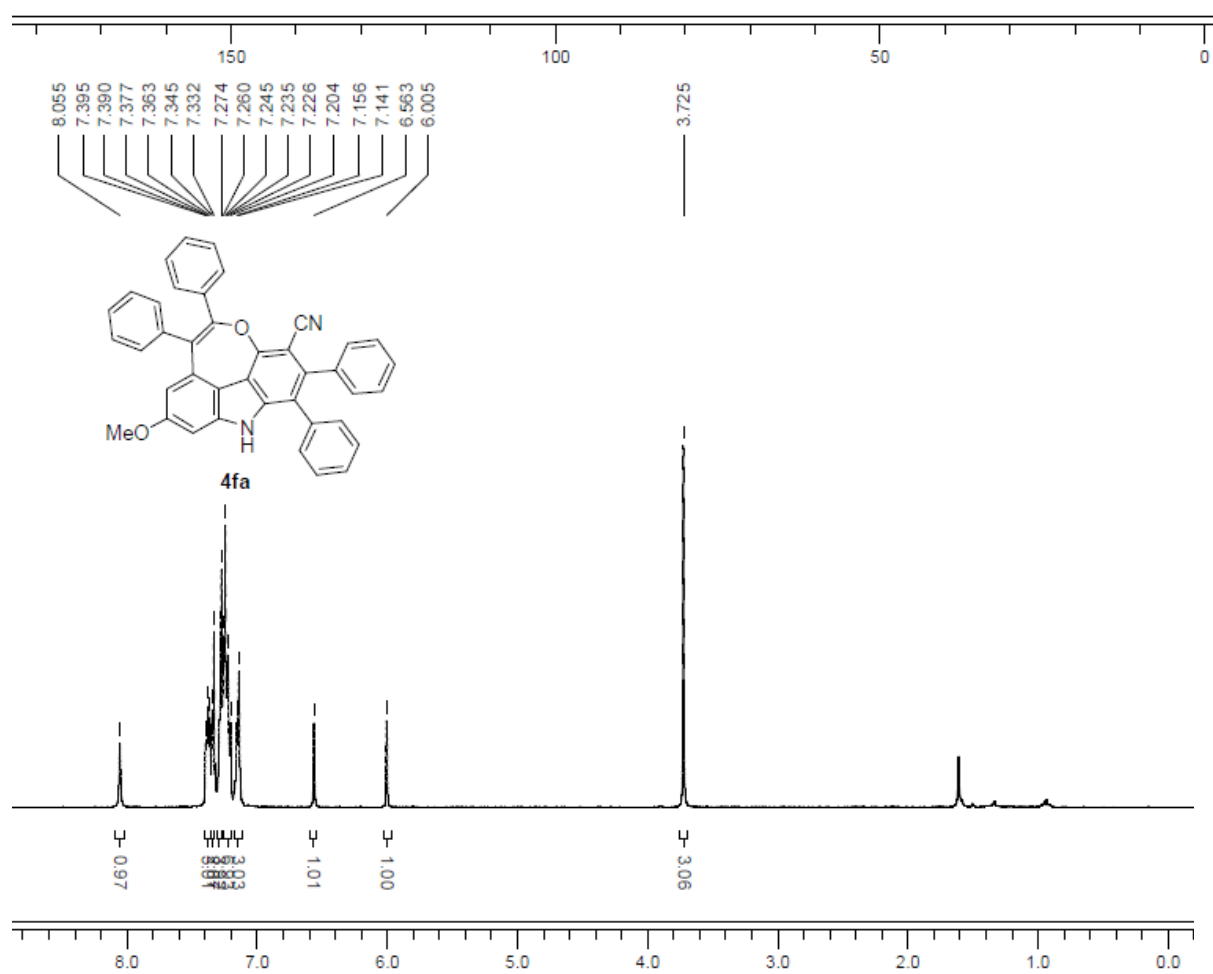

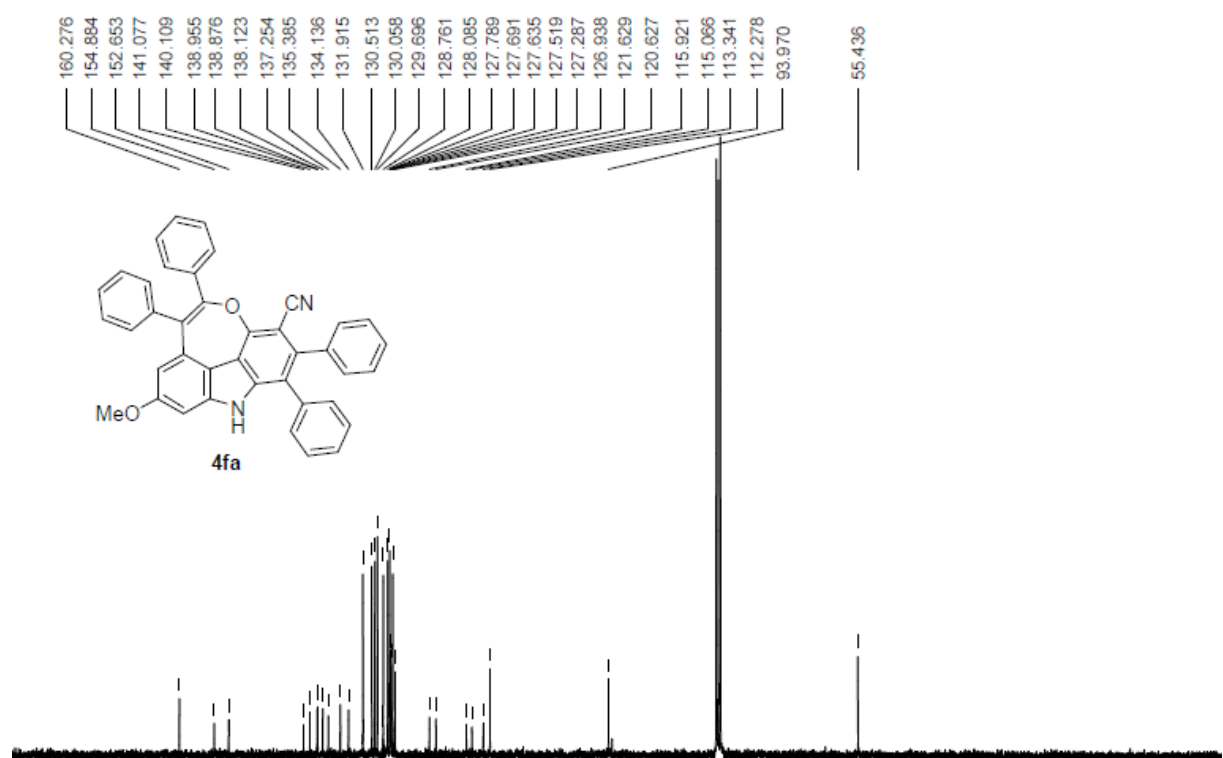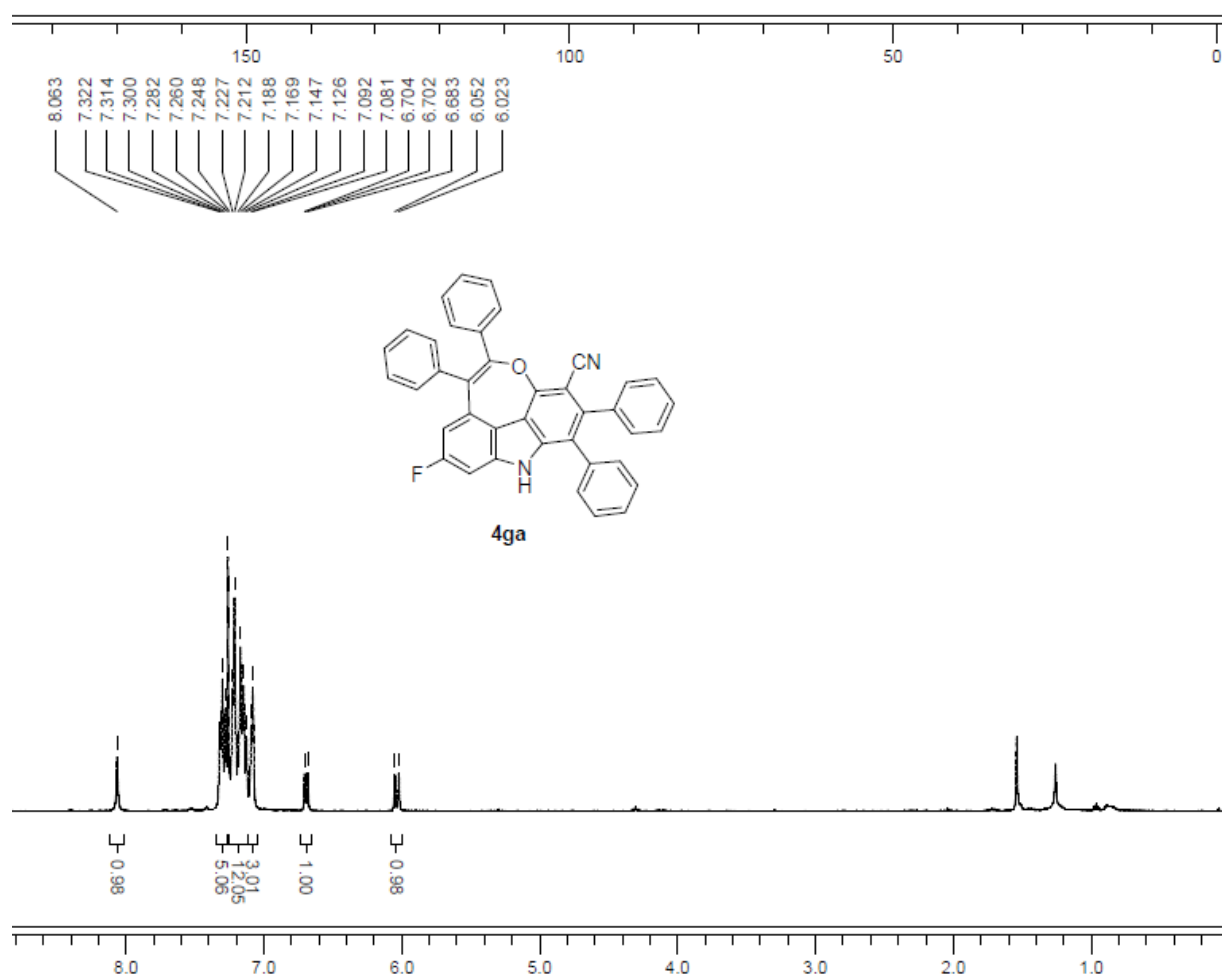

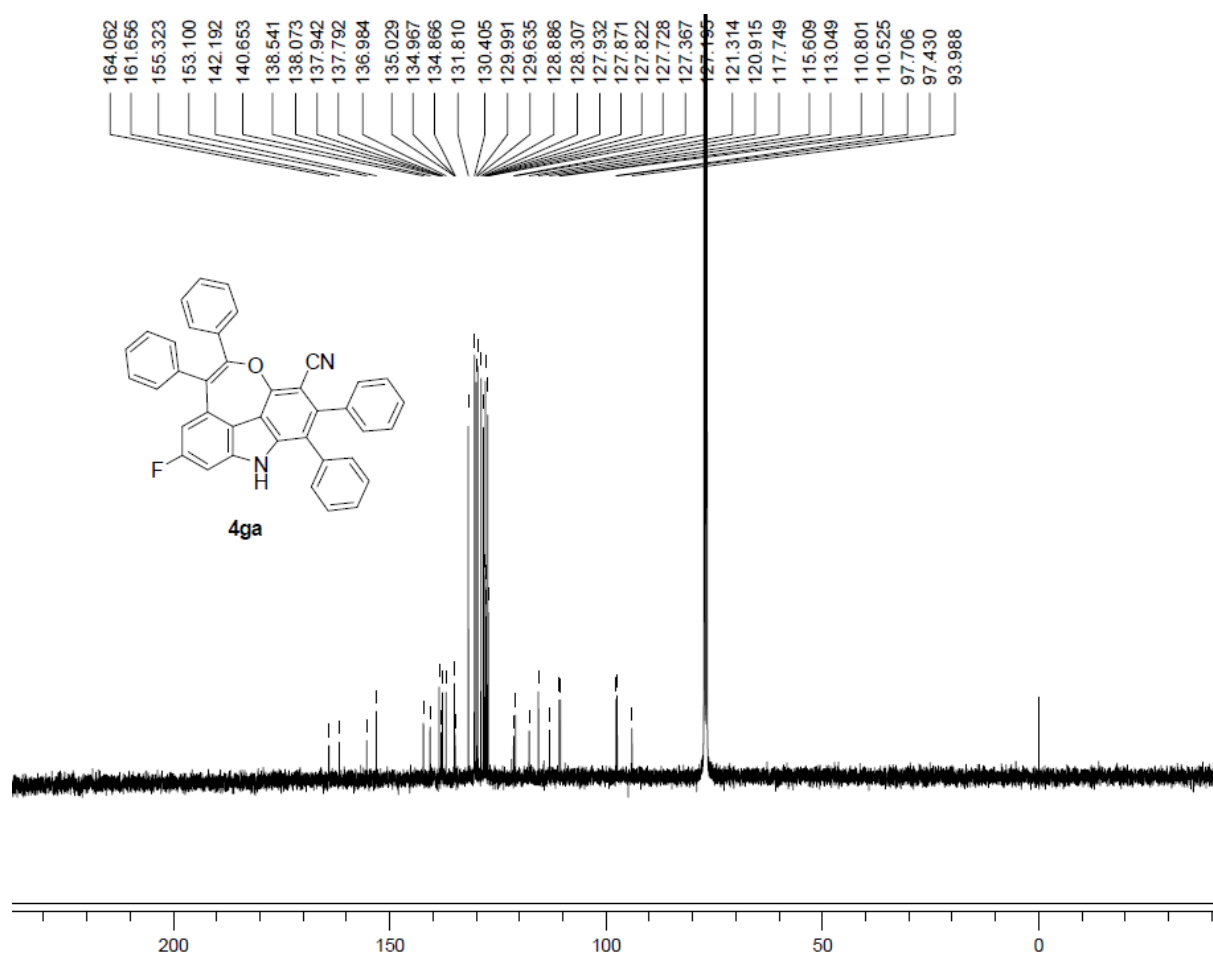

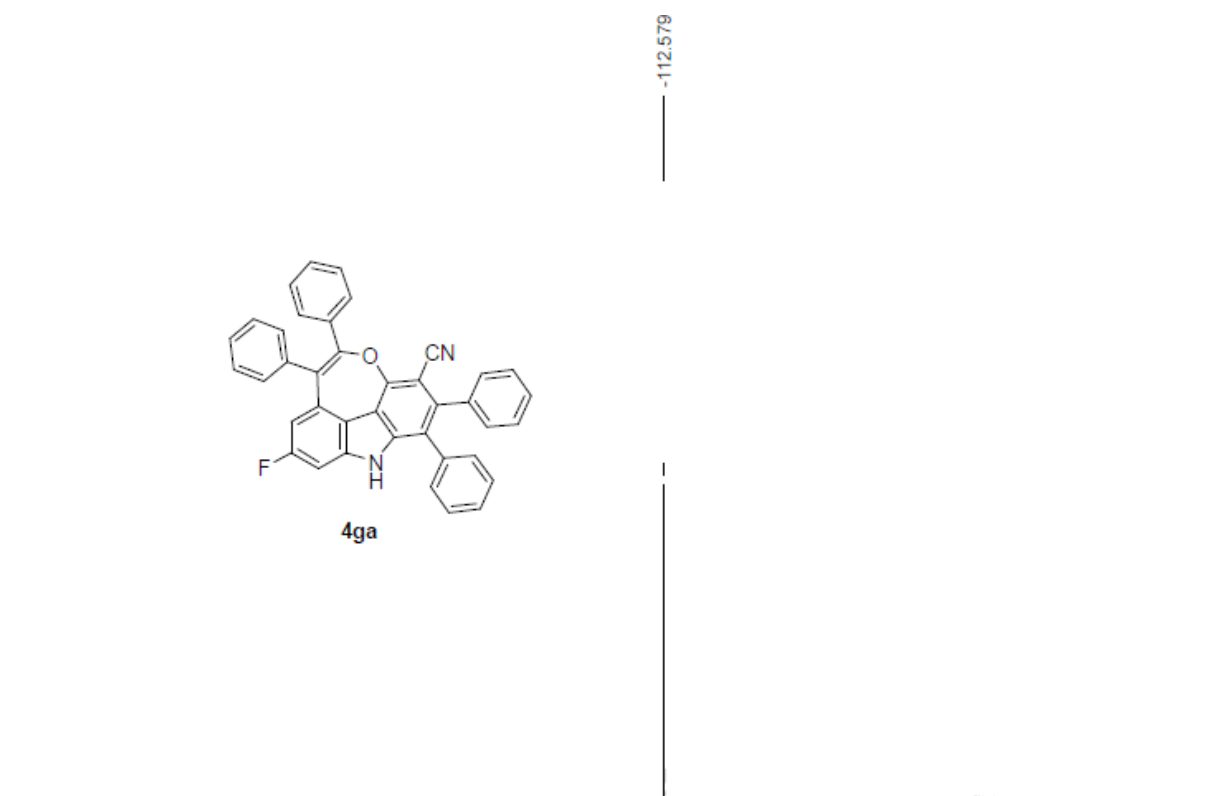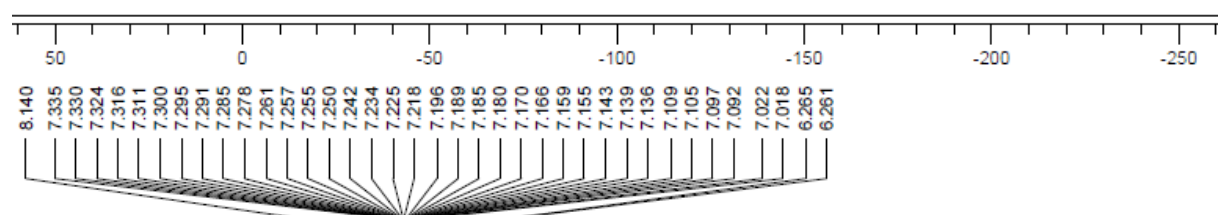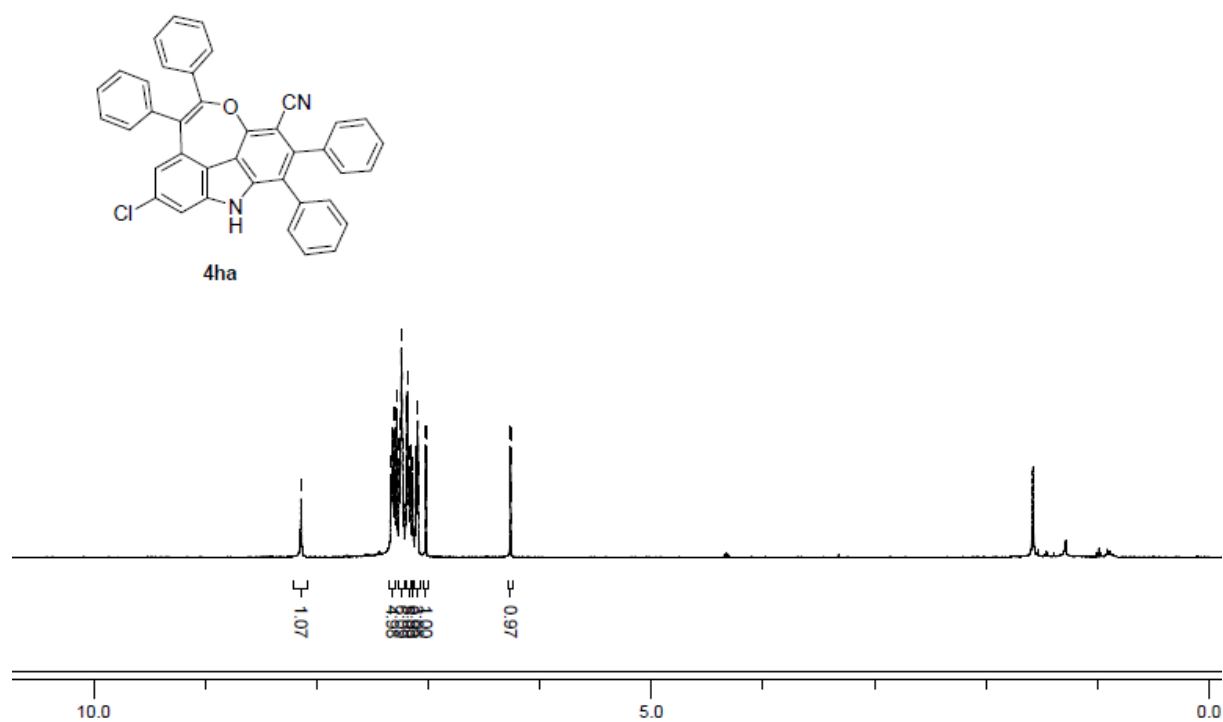

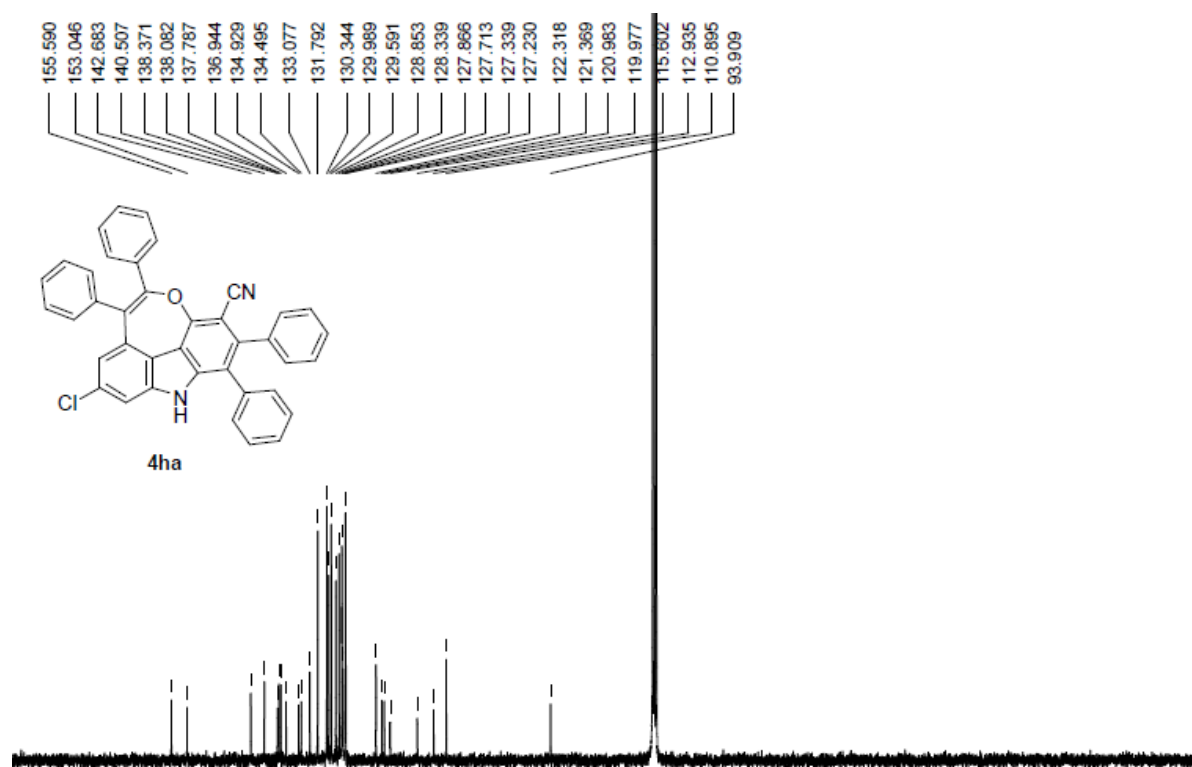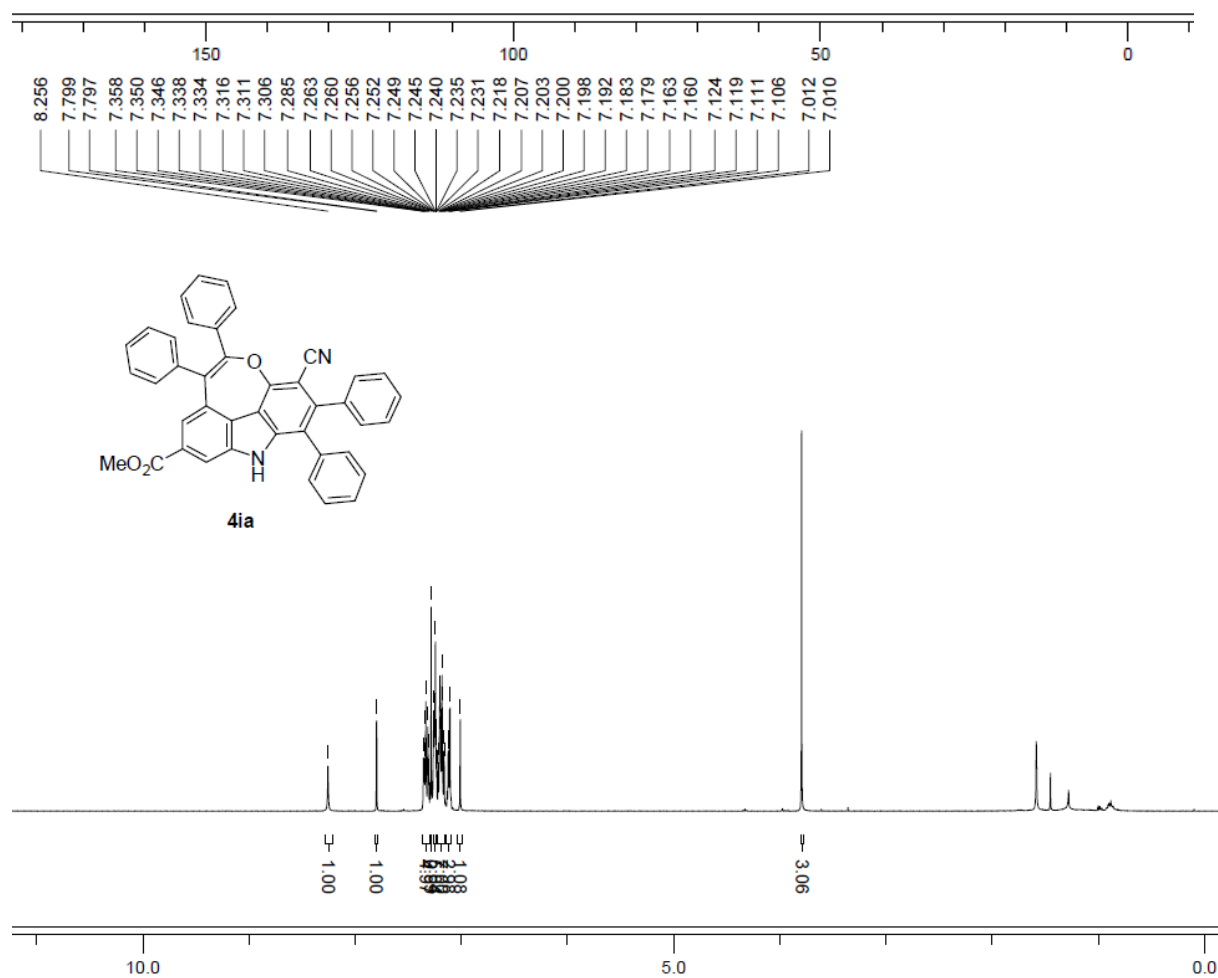

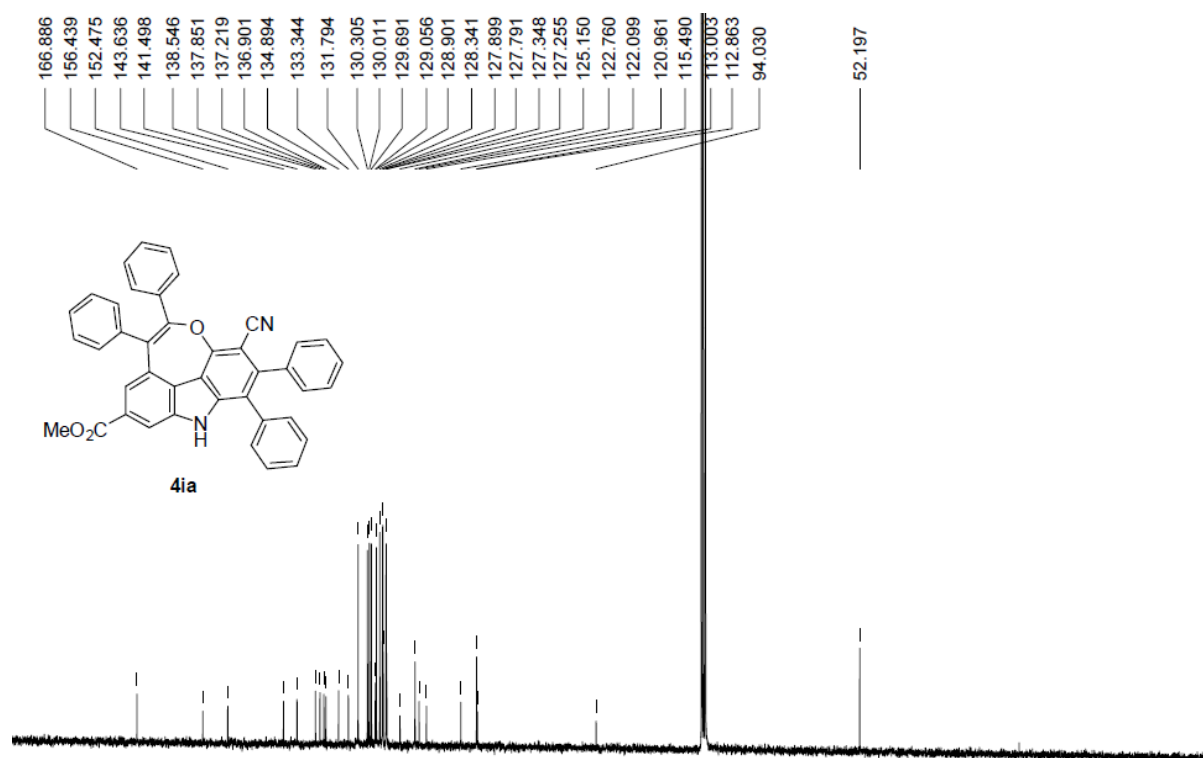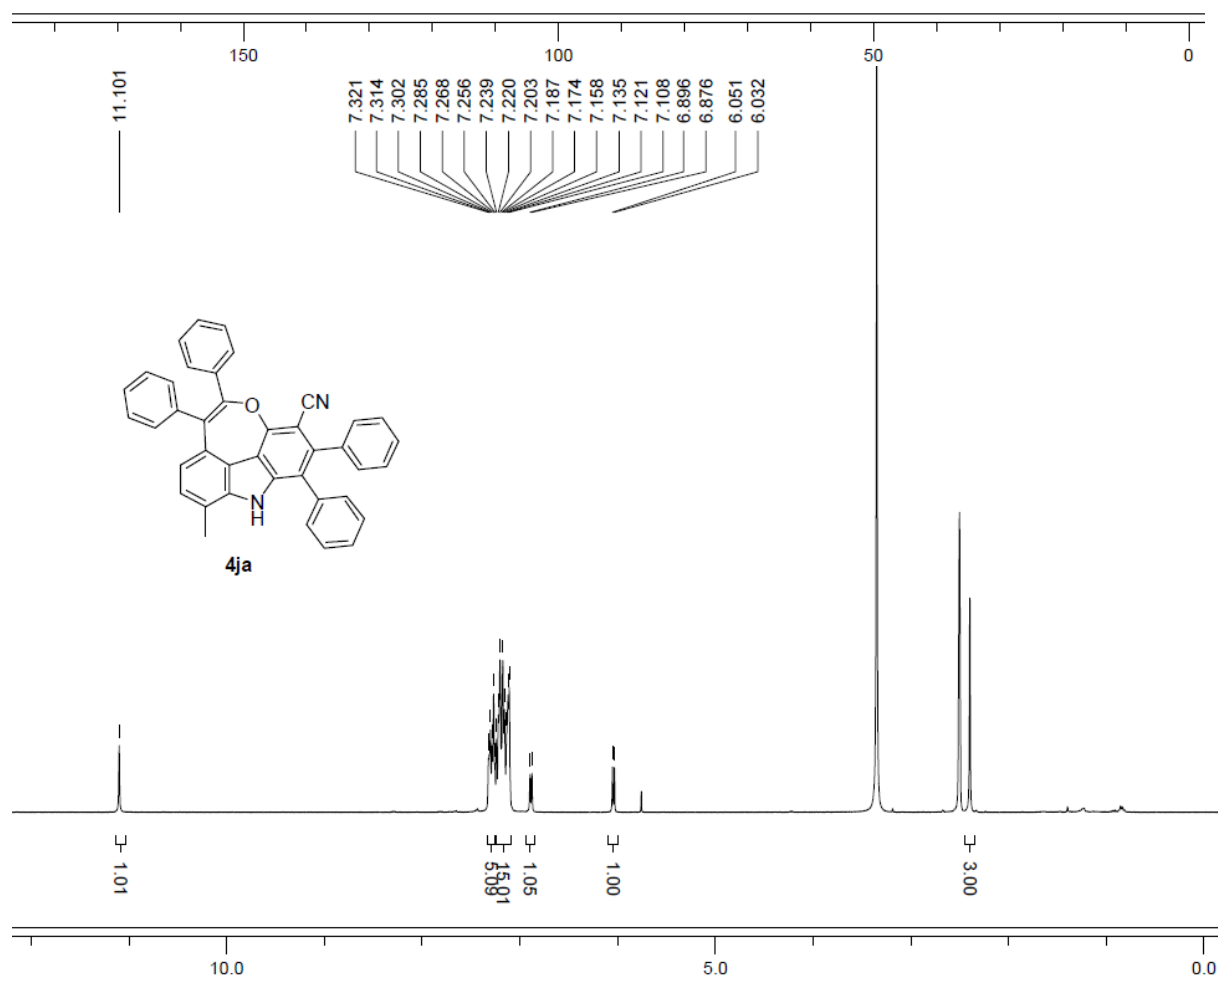



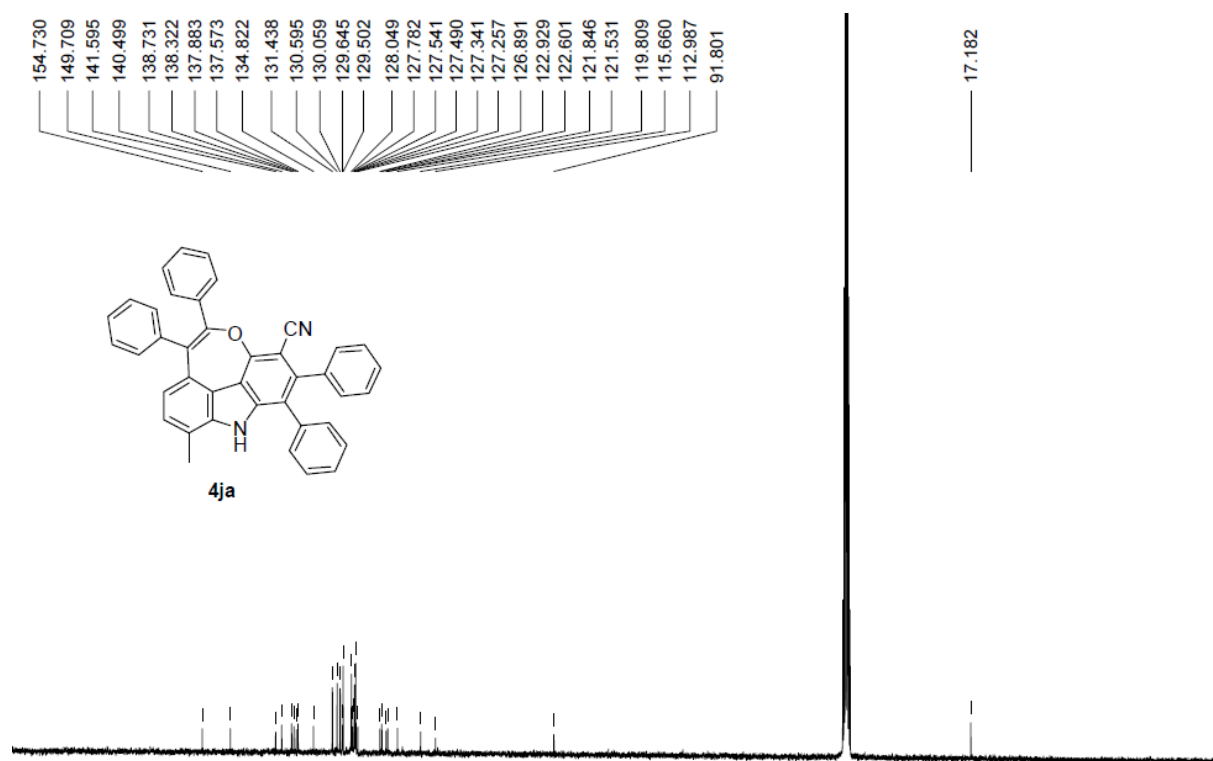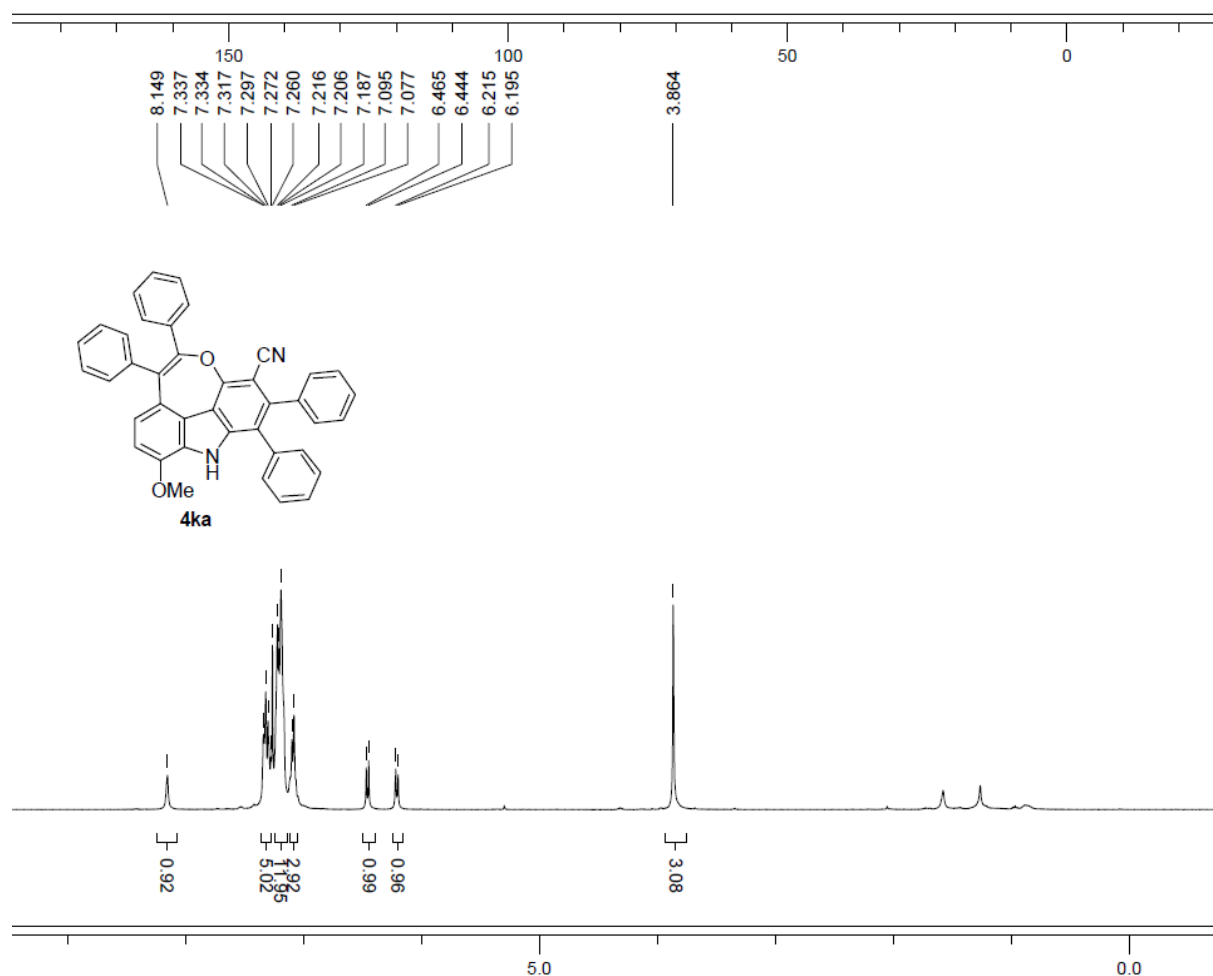

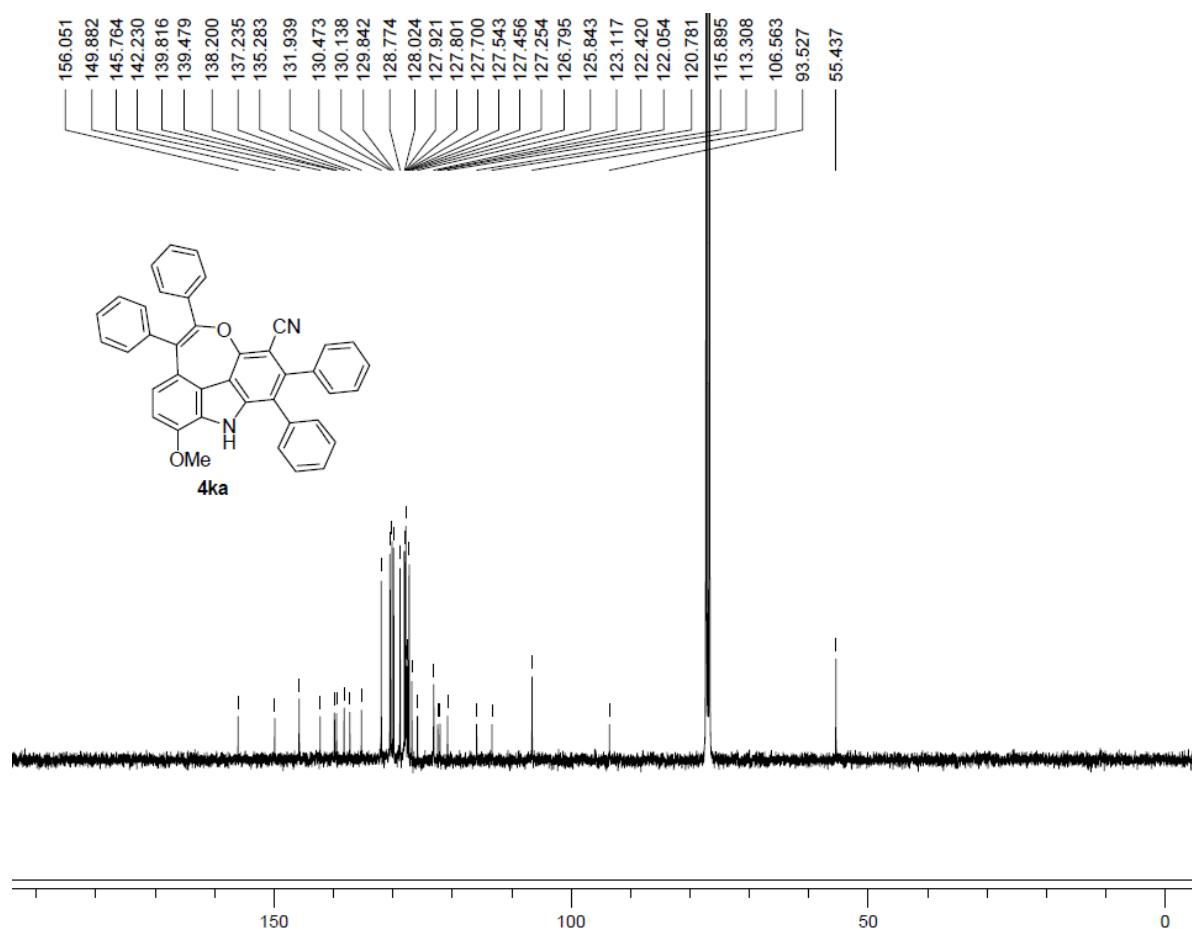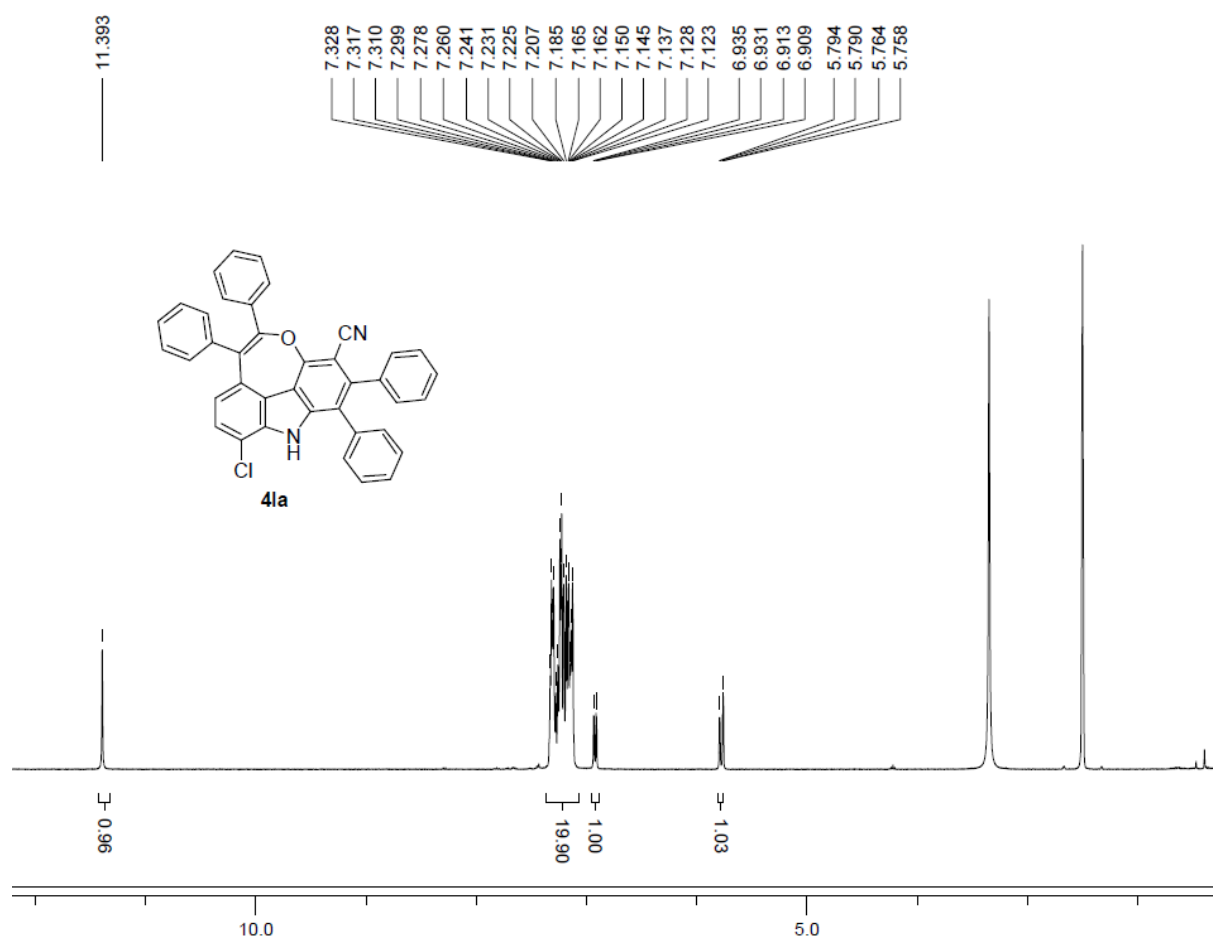

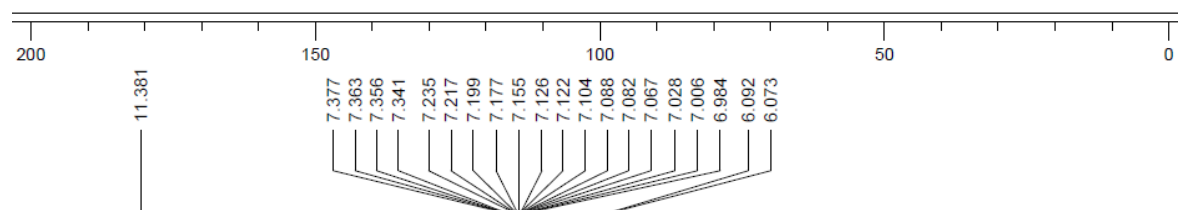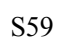

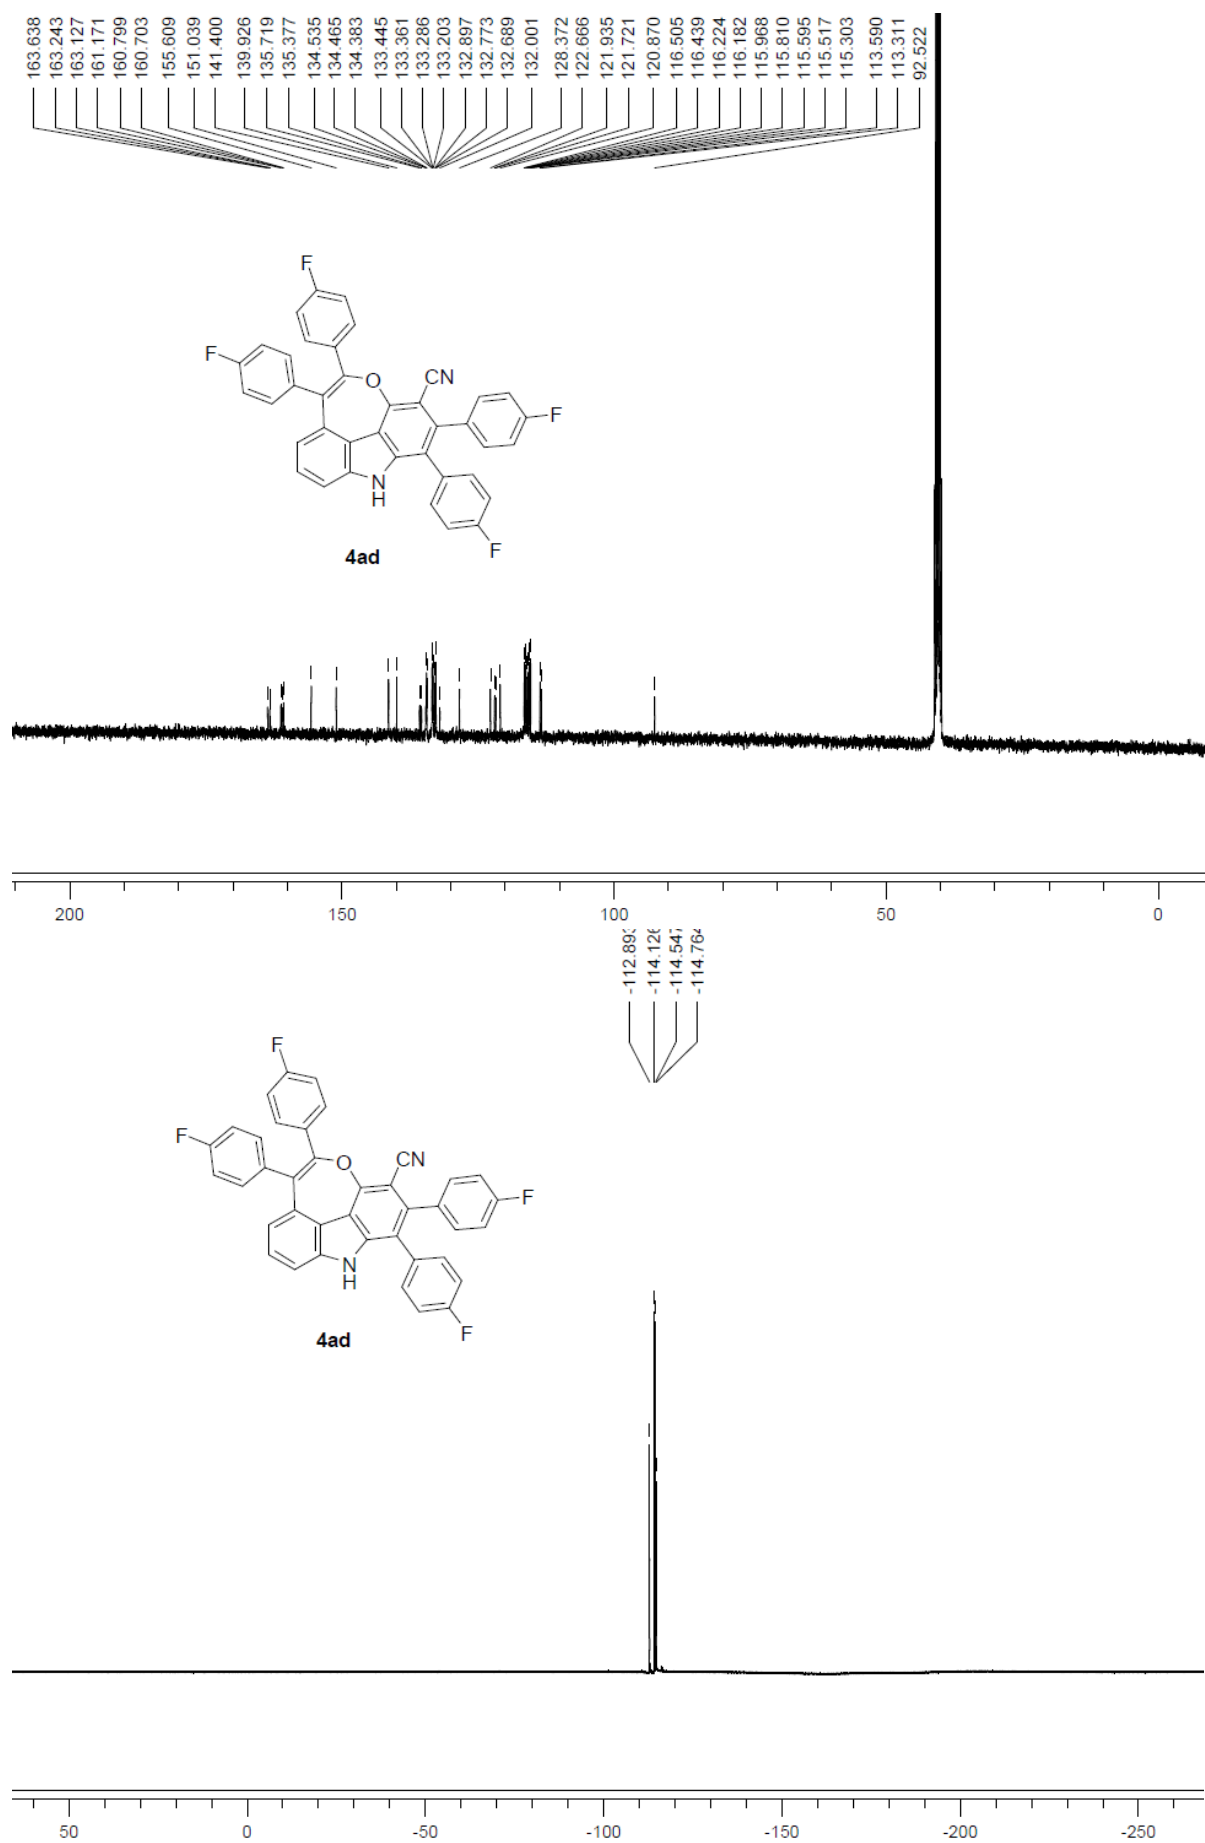

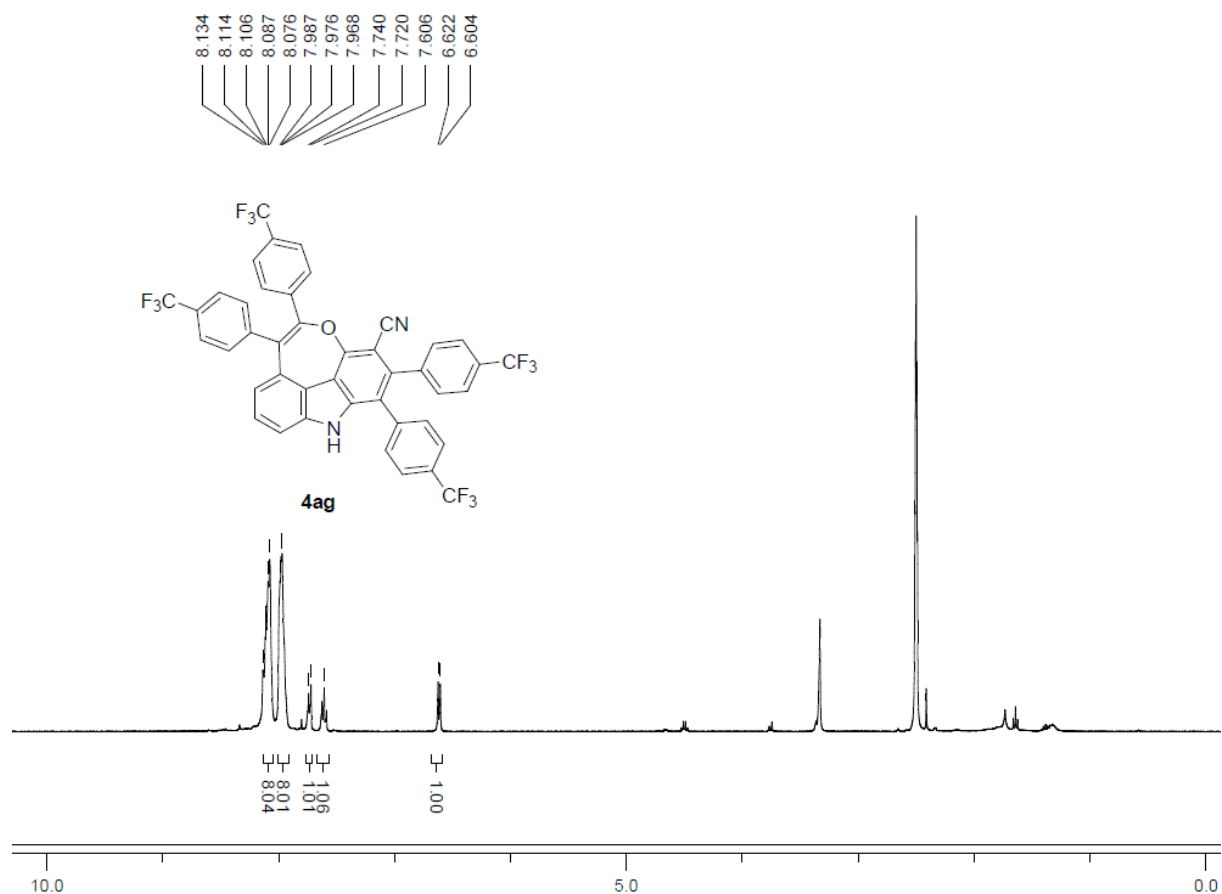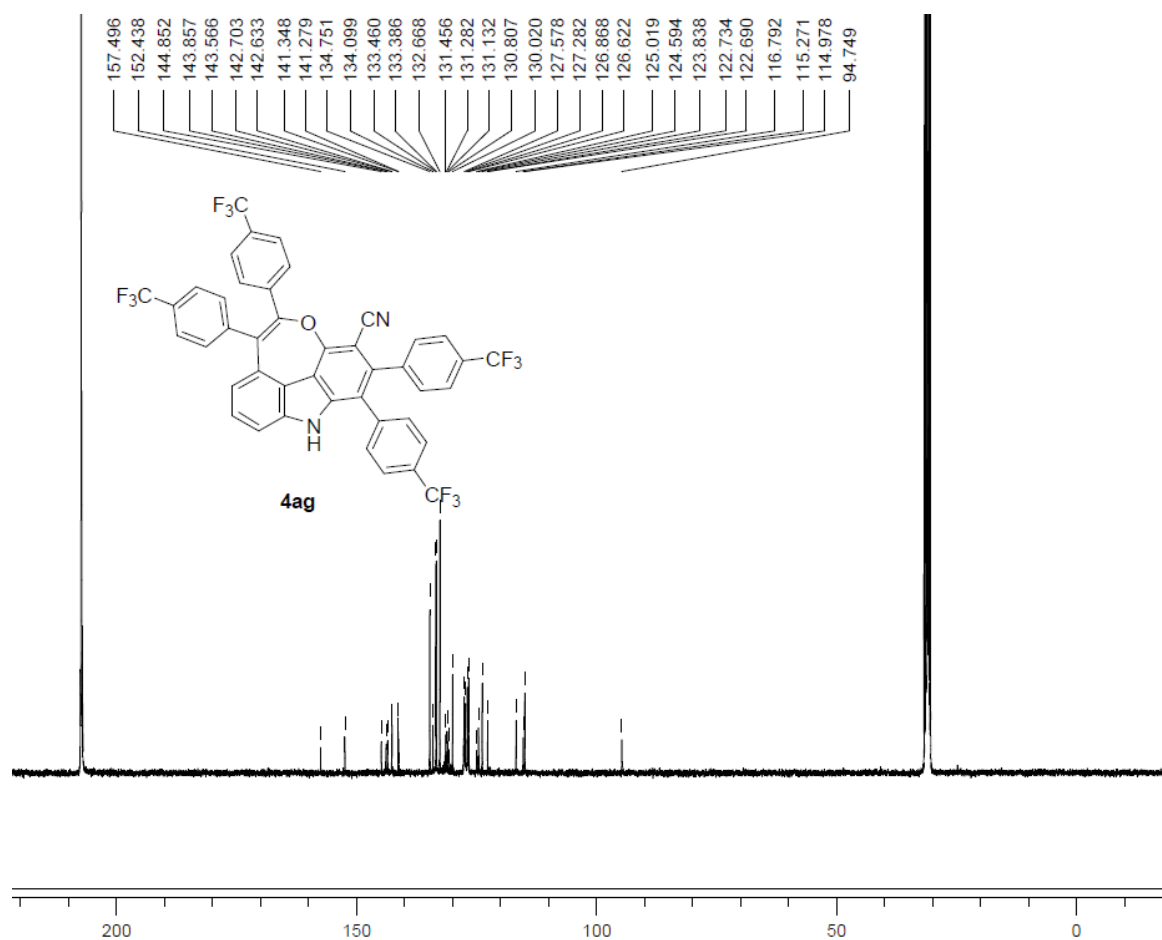



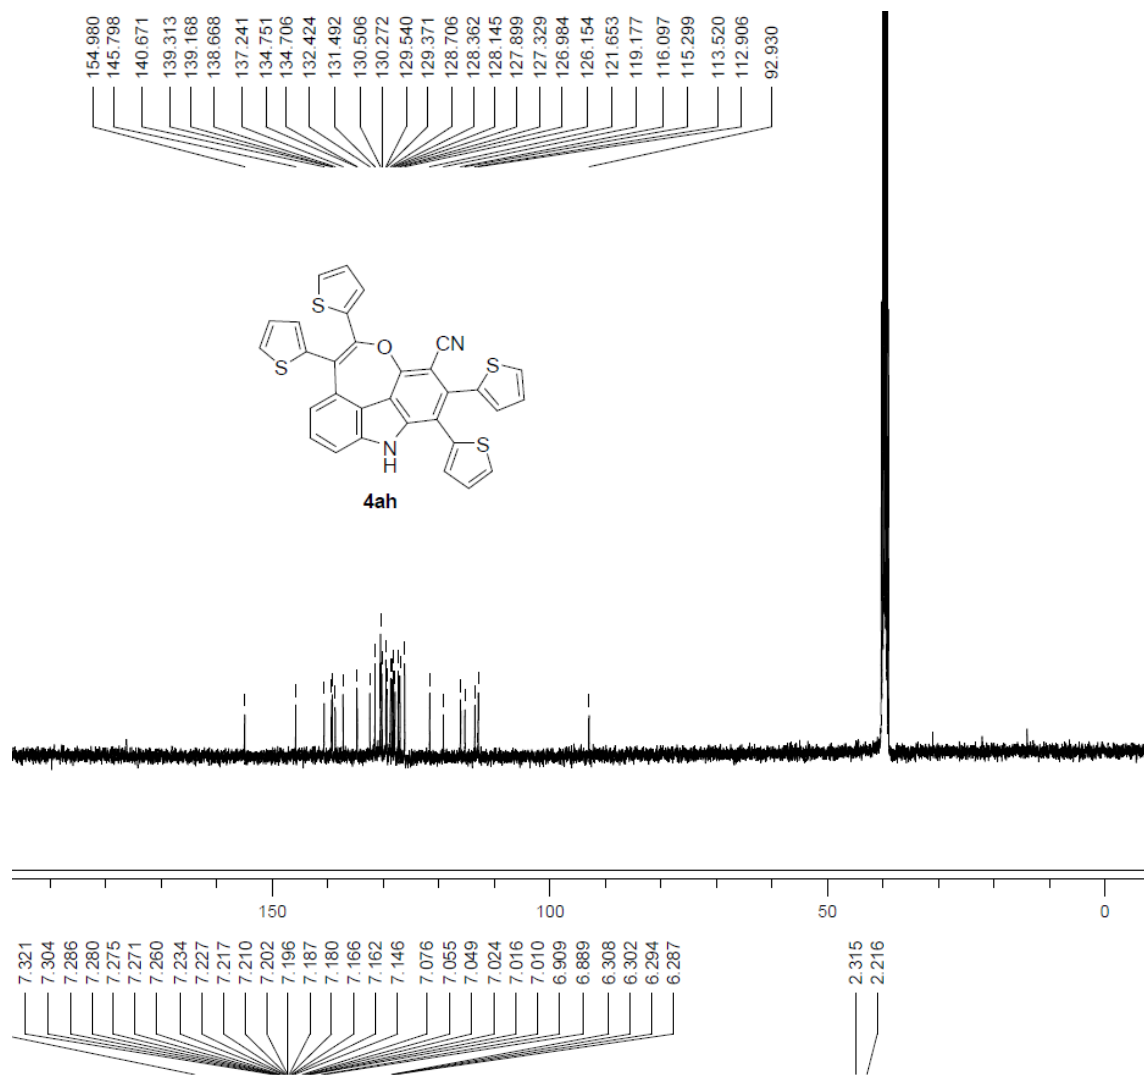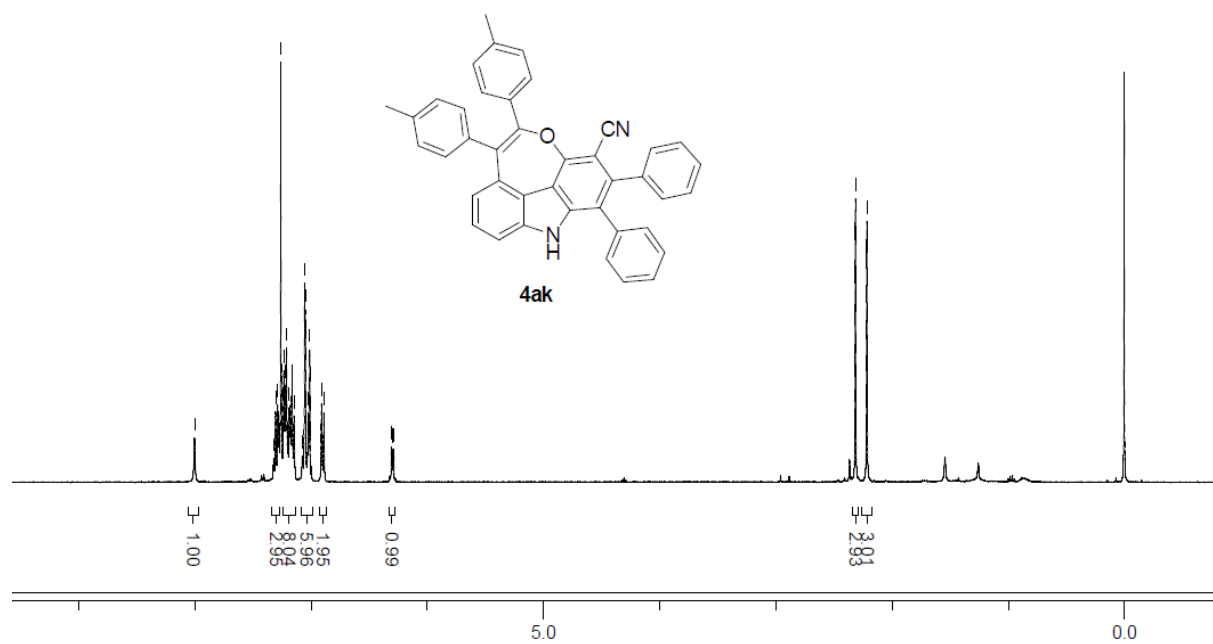

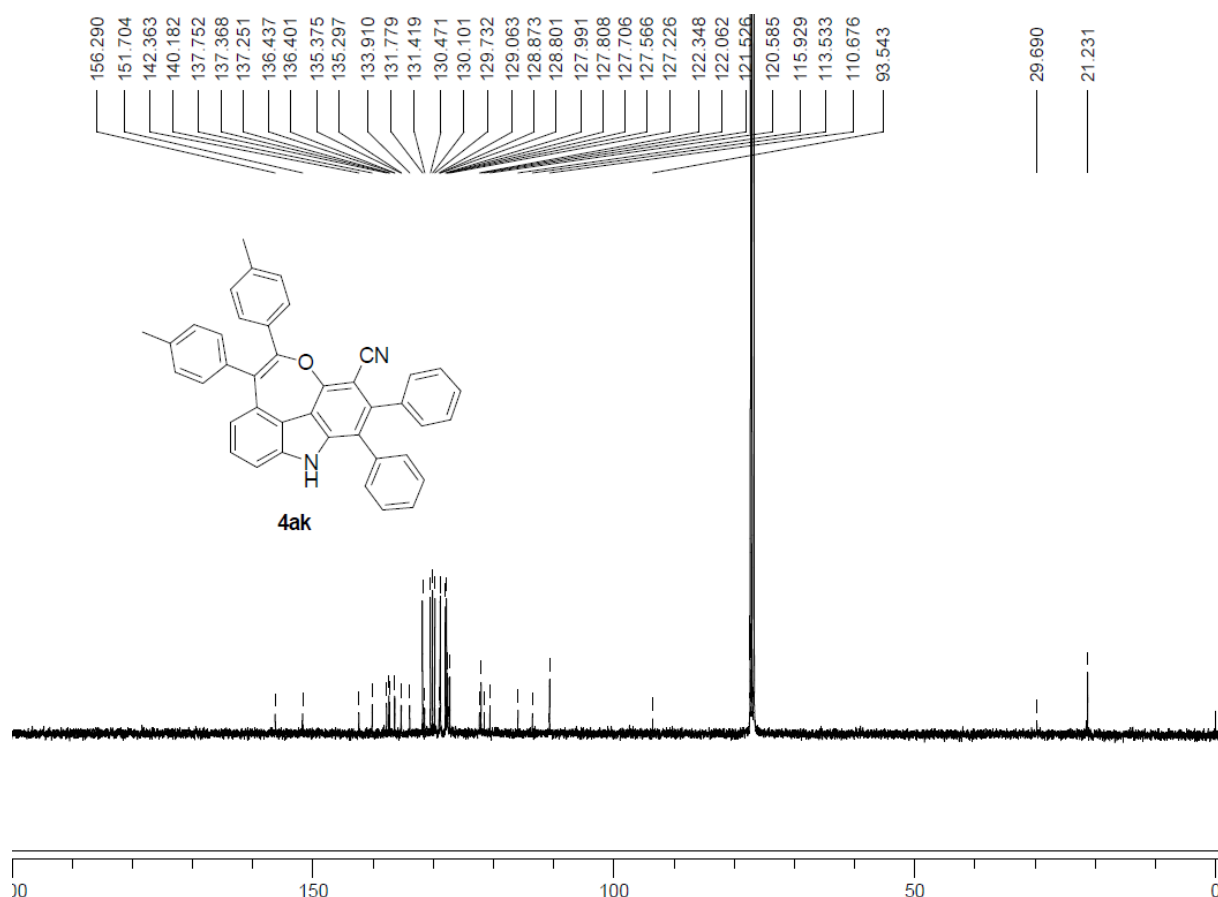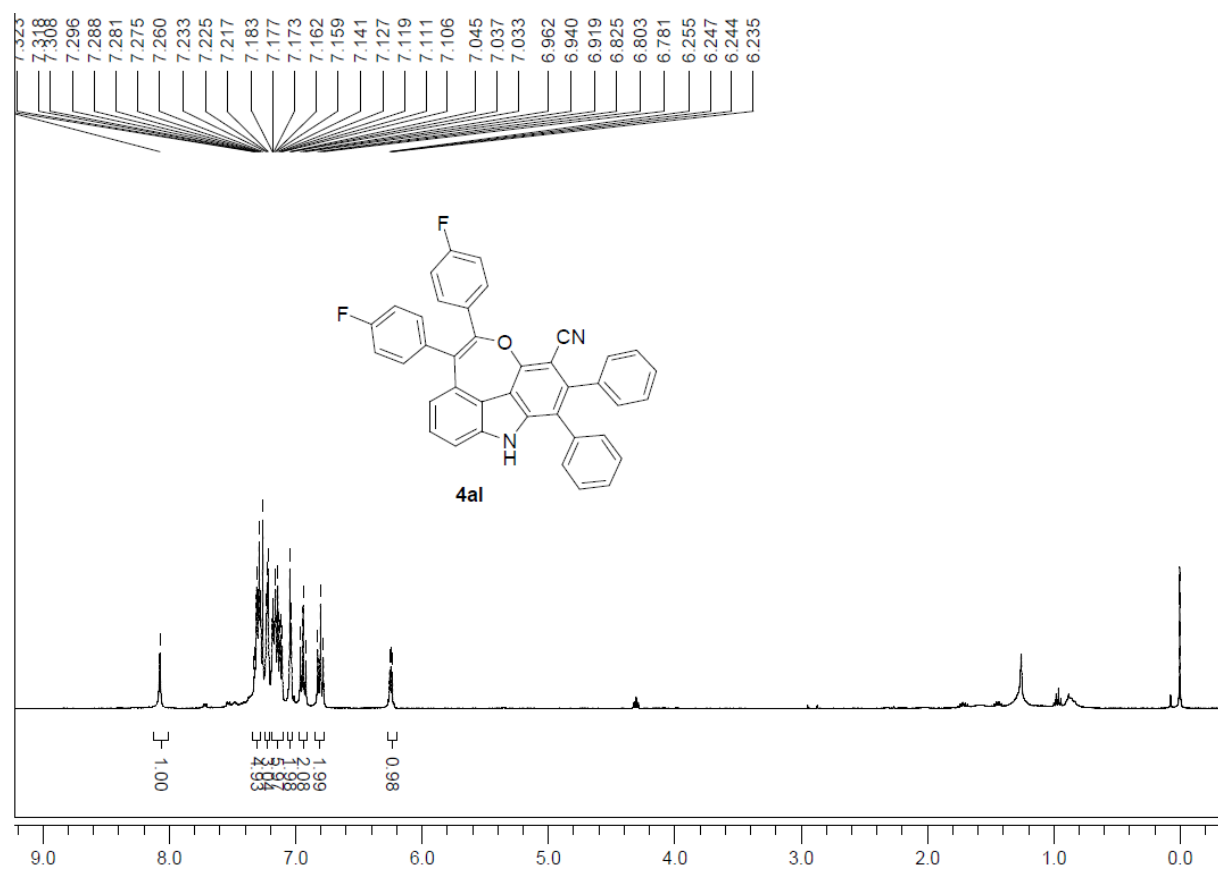



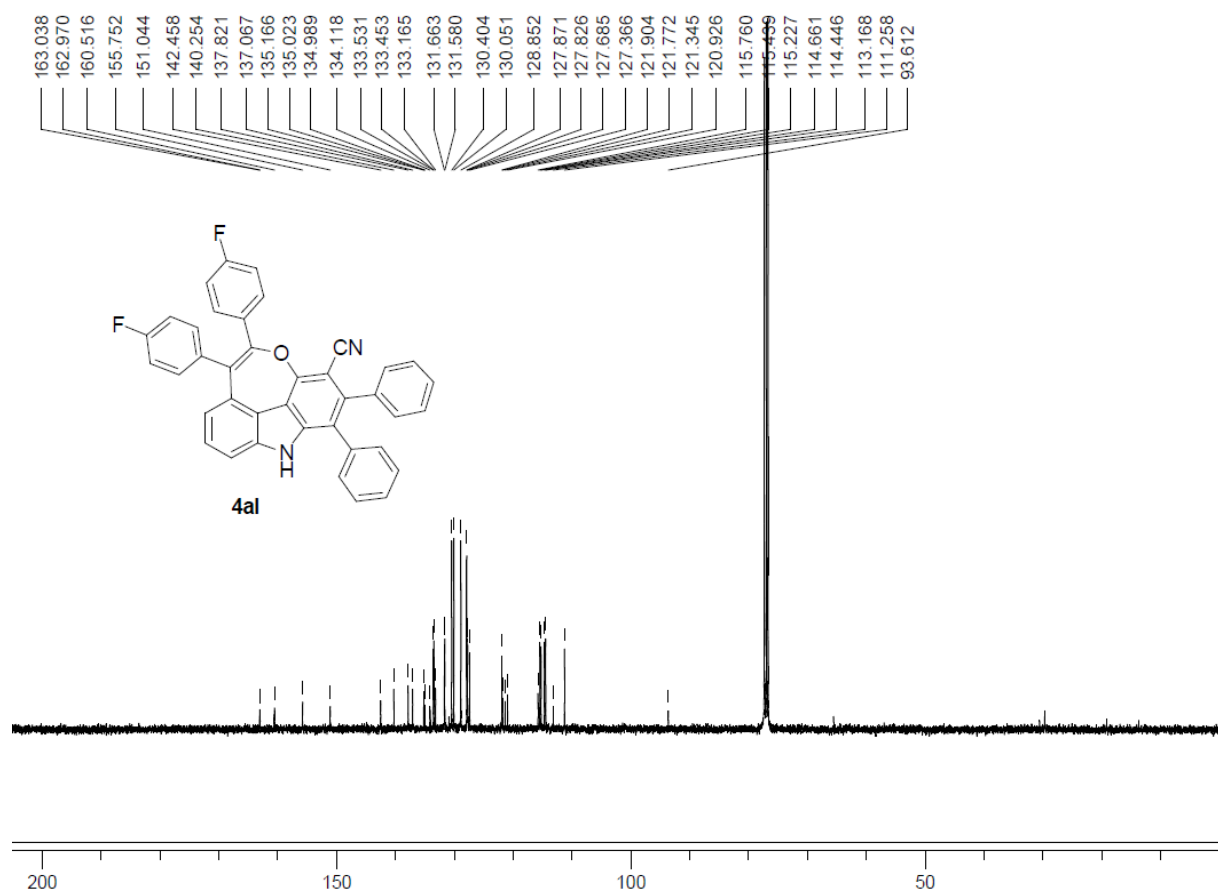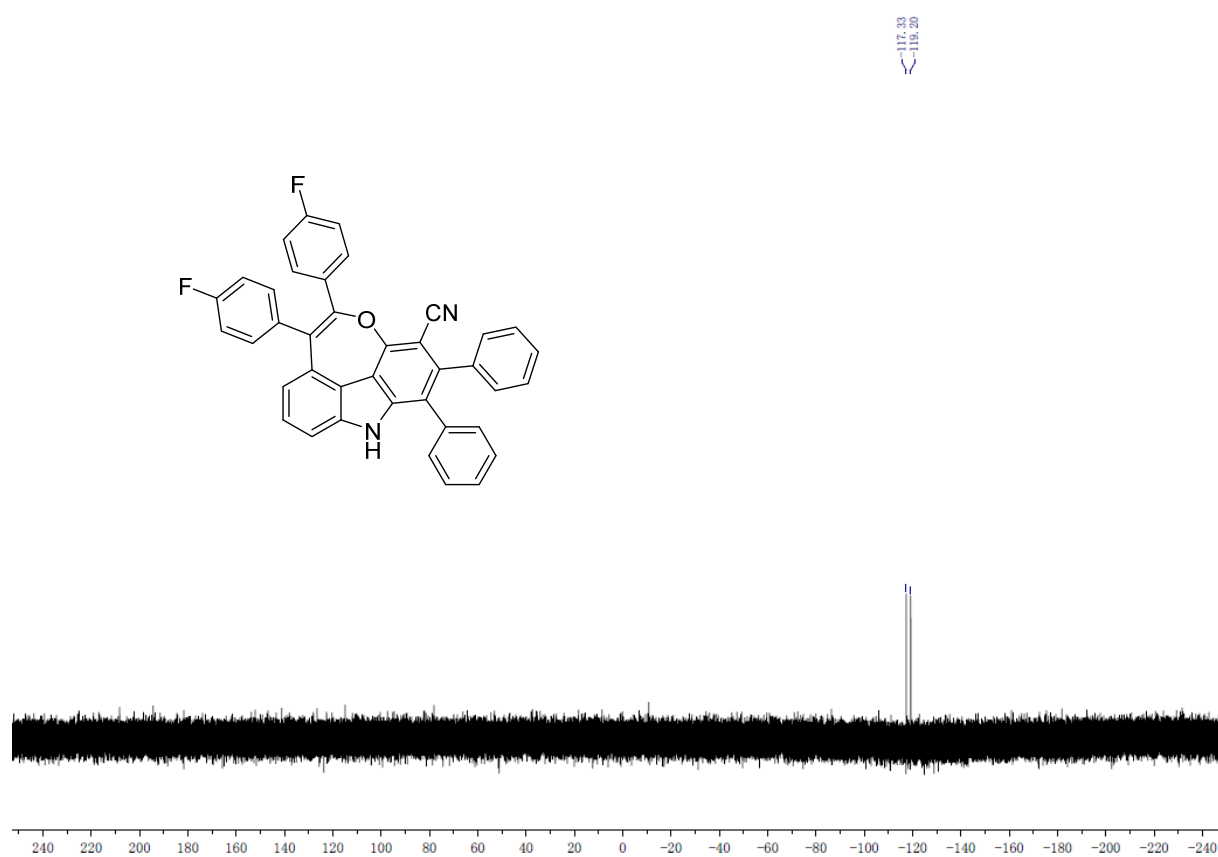

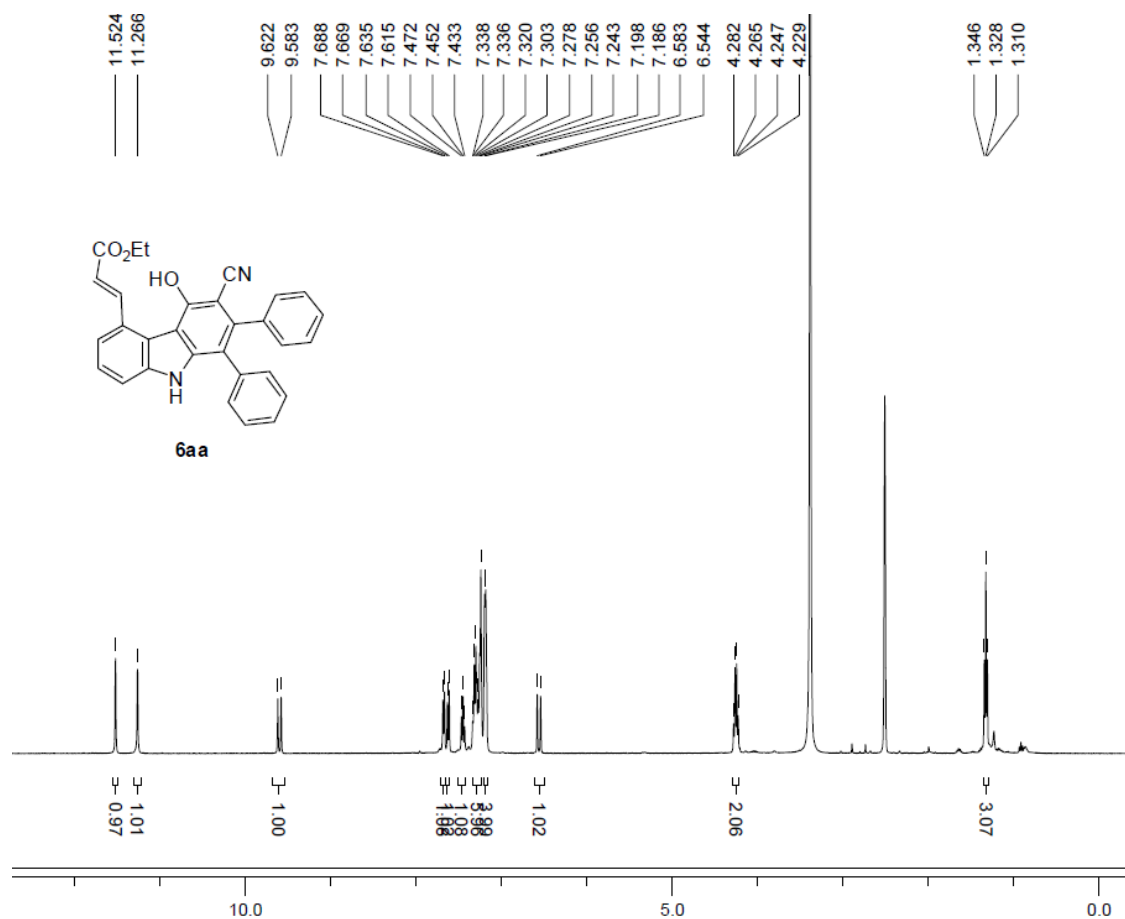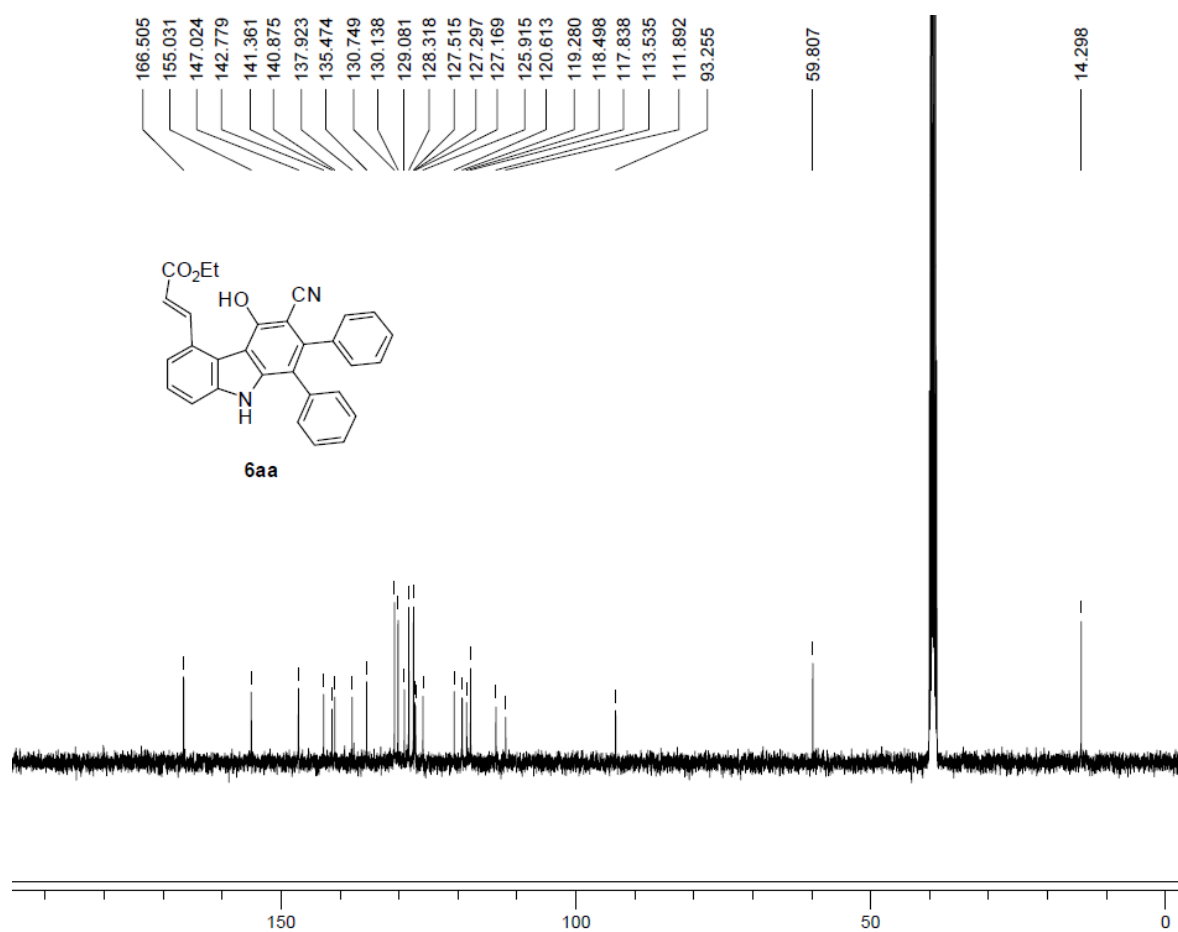



**References:**

1. C. White, A. Yates and P. M. Maitlis, *Inorg. Synth.* 1992, **29**, 228.
2. J. Slätt, I. Romero and J. Bergman, *Synthesis* 2004, **16**, 2760.
